# Supplementary material for: Draft genome assembly of the invasive cane toad, Rhinella marina
Source: PubMed Central journal article supplement (PMC6145236; doi:10.1093/gigascience/giy095), 2018-08-07

# GigaScience

## Draft genome assembly of the invasive cane toad, *Rhinella marina*

--Manuscript Draft--

|                                                      |                                                                                                                                                                                                                                                                                                                                                                                                                                                                                                                                                                                                                                                                                                                                                                                                                                                                                                                                                                                                                                                                                                                                                                                                                                                                                                                                                                                                                                                                                                                                                                                                               |                                          |
|------------------------------------------------------|---------------------------------------------------------------------------------------------------------------------------------------------------------------------------------------------------------------------------------------------------------------------------------------------------------------------------------------------------------------------------------------------------------------------------------------------------------------------------------------------------------------------------------------------------------------------------------------------------------------------------------------------------------------------------------------------------------------------------------------------------------------------------------------------------------------------------------------------------------------------------------------------------------------------------------------------------------------------------------------------------------------------------------------------------------------------------------------------------------------------------------------------------------------------------------------------------------------------------------------------------------------------------------------------------------------------------------------------------------------------------------------------------------------------------------------------------------------------------------------------------------------------------------------------------------------------------------------------------------------|------------------------------------------|
| <b>Manuscript Number:</b>                            | GIGA-D-18-00104R2                                                                                                                                                                                                                                                                                                                                                                                                                                                                                                                                                                                                                                                                                                                                                                                                                                                                                                                                                                                                                                                                                                                                                                                                                                                                                                                                                                                                                                                                                                                                                                                             |                                          |
| <b>Full Title:</b>                                   | Draft genome assembly of the invasive cane toad, <i>Rhinella marina</i>                                                                                                                                                                                                                                                                                                                                                                                                                                                                                                                                                                                                                                                                                                                                                                                                                                                                                                                                                                                                                                                                                                                                                                                                                                                                                                                                                                                                                                                                                                                                       |                                          |
| <b>Article Type:</b>                                 | Data Note                                                                                                                                                                                                                                                                                                                                                                                                                                                                                                                                                                                                                                                                                                                                                                                                                                                                                                                                                                                                                                                                                                                                                                                                                                                                                                                                                                                                                                                                                                                                                                                                     |                                          |
| <b>Funding Information:</b>                          | Australian Research Council (DP160102991)                                                                                                                                                                                                                                                                                                                                                                                                                                                                                                                                                                                                                                                                                                                                                                                                                                                                                                                                                                                                                                                                                                                                                                                                                                                                                                                                                                                                                                                                                                                                                                     | Dr. Lee A Rollins<br>Prof. Richard Shine |
|                                                      | Australian Research Council (DE150101393)                                                                                                                                                                                                                                                                                                                                                                                                                                                                                                                                                                                                                                                                                                                                                                                                                                                                                                                                                                                                                                                                                                                                                                                                                                                                                                                                                                                                                                                                                                                                                                     | Dr. Lee A Rollins                        |
|                                                      | Australian Research Council (FL170100022)                                                                                                                                                                                                                                                                                                                                                                                                                                                                                                                                                                                                                                                                                                                                                                                                                                                                                                                                                                                                                                                                                                                                                                                                                                                                                                                                                                                                                                                                                                                                                                     | Prof. Edward C Holmes                    |
|                                                      | Australian Research Council (LE150100031)                                                                                                                                                                                                                                                                                                                                                                                                                                                                                                                                                                                                                                                                                                                                                                                                                                                                                                                                                                                                                                                                                                                                                                                                                                                                                                                                                                                                                                                                                                                                                                     | Prof. Marc R Wilkins                     |
|                                                      | Australian Research Council (FL120100074)                                                                                                                                                                                                                                                                                                                                                                                                                                                                                                                                                                                                                                                                                                                                                                                                                                                                                                                                                                                                                                                                                                                                                                                                                                                                                                                                                                                                                                                                                                                                                                     | Prof. Richard Shine                      |
|                                                      | The National Council for Scientific and Technological Development (CNPq) (302892/2016-8)                                                                                                                                                                                                                                                                                                                                                                                                                                                                                                                                                                                                                                                                                                                                                                                                                                                                                                                                                                                                                                                                                                                                                                                                                                                                                                                                                                                                                                                                                                                      | Assoc. Prof. Marcelo Vallinoto           |
|                                                      | Bioplatforms Australia                                                                                                                                                                                                                                                                                                                                                                                                                                                                                                                                                                                                                                                                                                                                                                                                                                                                                                                                                                                                                                                                                                                                                                                                                                                                                                                                                                                                                                                                                                                                                                                        | Not applicable                           |
| <b>Abstract:</b>                                     | <p>Background: The cane toad (<i>Rhinella marina</i> formerly <i>Bufo marinus</i>) is a species native to Central and South America that has spread across many regions of the globe. Cane toads are known for their rapid adaptation and deleterious impacts on native fauna in invaded regions. However, despite an iconic status, there are major gaps in our understanding of cane toad genetics. The availability of a genome would help to close these gaps and accelerate cane toad research. Findings: We report a draft genome assembly for <i>R. marina</i>, the first of its kind for the Bufonidae family. We used a combination of long read PacBio RS II and short read Illumina HiSeq X sequencing to generate a total of 359.5 Gb of raw sequence data. The final hybrid assembly of 31,392 scaffolds was 2.55 Gb in length with a scaffold N50 of 168 kb. BUSCO analysis revealed that the assembly included full length or partial fragments of 90.6% of tetrapod universal single-copy orthologs (n=3950), illustrating that the gene-containing regions have been well-assembled. Annotation predicted 58,302 protein coding genes, with 25,846 similar to known proteins in SwissProt. Repeat sequences were estimated to account for 63.9% of the assembly. Conclusion: The <i>R. marina</i> draft genome assembly will be an invaluable resource that can be used to further probe the biology of this invasive species. Future analysis of the genome will provide insights into cane toad evolution and enrich our understanding of their interplay with the ecosystem at large.</p> |                                          |
| <b>Corresponding Author:</b>                         | Peter White, Ph.D.<br>University of New South Wales<br>Sydney, NSW AUSTRALIA                                                                                                                                                                                                                                                                                                                                                                                                                                                                                                                                                                                                                                                                                                                                                                                                                                                                                                                                                                                                                                                                                                                                                                                                                                                                                                                                                                                                                                                                                                                                  |                                          |
| <b>Corresponding Author Secondary Information:</b>   |                                                                                                                                                                                                                                                                                                                                                                                                                                                                                                                                                                                                                                                                                                                                                                                                                                                                                                                                                                                                                                                                                                                                                                                                                                                                                                                                                                                                                                                                                                                                                                                                               |                                          |
| <b>Corresponding Author's Institution:</b>           | University of New South Wales                                                                                                                                                                                                                                                                                                                                                                                                                                                                                                                                                                                                                                                                                                                                                                                                                                                                                                                                                                                                                                                                                                                                                                                                                                                                                                                                                                                                                                                                                                                                                                                 |                                          |
| <b>Corresponding Author's Secondary Institution:</b> |                                                                                                                                                                                                                                                                                                                                                                                                                                                                                                                                                                                                                                                                                                                                                                                                                                                                                                                                                                                                                                                                                                                                                                                                                                                                                                                                                                                                                                                                                                                                                                                                               |                                          |
| <b>First Author:</b>                                 | Richard J Edwards                                                                                                                                                                                                                                                                                                                                                                                                                                                                                                                                                                                                                                                                                                                                                                                                                                                                                                                                                                                                                                                                                                                                                                                                                                                                                                                                                                                                                                                                                                                                                                                             |                                          |
| <b>First Author Secondary Information:</b>           |                                                                                                                                                                                                                                                                                                                                                                                                                                                                                                                                                                                                                                                                                                                                                                                                                                                                                                                                                                                                                                                                                                                                                                                                                                                                                                                                                                                                                                                                                                                                                                                                               |                                          |
| <b>Order of Authors:</b>                             | Richard J Edwards                                                                                                                                                                                                                                                                                                                                                                                                                                                                                                                                                                                                                                                                                                                                                                                                                                                                                                                                                                                                                                                                                                                                                                                                                                                                                                                                                                                                                                                                                                                                                                                             |                                          |
|                                                      | Daniel Enosi Tuipulotu                                                                                                                                                                                                                                                                                                                                                                                                                                                                                                                                                                                                                                                                                                                                                                                                                                                                                                                                                                                                                                                                                                                                                                                                                                                                                                                                                                                                                                                                                                                                                                                        |                                          |
|                                                      | Timothy G Amos                                                                                                                                                                                                                                                                                                                                                                                                                                                                                                                                                                                                                                                                                                                                                                                                                                                                                                                                                                                                                                                                                                                                                                                                                                                                                                                                                                                                                                                                                                                                                                                                |                                          |
|                                                      |                                                                                                                                                                                                                                                                                                                                                                                                                                                                                                                                                                                                                                                                                                                                                                                                                                                                                                                                                                                                                                                                                                                                                                                                                                                                                                                                                                                                                                                                                                                                                                                                               |                                          |

|                                                |                                                                                                                                                                                                                                                                                                                                                                                                                                                                                                                                                                                                                                                                                                                                                                                                                                                                                                                                                                                                                                                                                                                                                                                                                                                                                                                                                                                                                                                                                                                                                                                                                                                                                                                                                                                                                                                                                                                                                                                                                                                                                                                                                                                                                                                                                                                                                                                                                                                                                                                                                                                                                                                                                                                                                                    |
|------------------------------------------------|--------------------------------------------------------------------------------------------------------------------------------------------------------------------------------------------------------------------------------------------------------------------------------------------------------------------------------------------------------------------------------------------------------------------------------------------------------------------------------------------------------------------------------------------------------------------------------------------------------------------------------------------------------------------------------------------------------------------------------------------------------------------------------------------------------------------------------------------------------------------------------------------------------------------------------------------------------------------------------------------------------------------------------------------------------------------------------------------------------------------------------------------------------------------------------------------------------------------------------------------------------------------------------------------------------------------------------------------------------------------------------------------------------------------------------------------------------------------------------------------------------------------------------------------------------------------------------------------------------------------------------------------------------------------------------------------------------------------------------------------------------------------------------------------------------------------------------------------------------------------------------------------------------------------------------------------------------------------------------------------------------------------------------------------------------------------------------------------------------------------------------------------------------------------------------------------------------------------------------------------------------------------------------------------------------------------------------------------------------------------------------------------------------------------------------------------------------------------------------------------------------------------------------------------------------------------------------------------------------------------------------------------------------------------------------------------------------------------------------------------------------------------|
|                                                | Denis O'Meally                                                                                                                                                                                                                                                                                                                                                                                                                                                                                                                                                                                                                                                                                                                                                                                                                                                                                                                                                                                                                                                                                                                                                                                                                                                                                                                                                                                                                                                                                                                                                                                                                                                                                                                                                                                                                                                                                                                                                                                                                                                                                                                                                                                                                                                                                                                                                                                                                                                                                                                                                                                                                                                                                                                                                     |
|                                                | Mark F Richardson                                                                                                                                                                                                                                                                                                                                                                                                                                                                                                                                                                                                                                                                                                                                                                                                                                                                                                                                                                                                                                                                                                                                                                                                                                                                                                                                                                                                                                                                                                                                                                                                                                                                                                                                                                                                                                                                                                                                                                                                                                                                                                                                                                                                                                                                                                                                                                                                                                                                                                                                                                                                                                                                                                                                                  |
|                                                | Tonia L Russell                                                                                                                                                                                                                                                                                                                                                                                                                                                                                                                                                                                                                                                                                                                                                                                                                                                                                                                                                                                                                                                                                                                                                                                                                                                                                                                                                                                                                                                                                                                                                                                                                                                                                                                                                                                                                                                                                                                                                                                                                                                                                                                                                                                                                                                                                                                                                                                                                                                                                                                                                                                                                                                                                                                                                    |
|                                                | Marcelo Vallinoto                                                                                                                                                                                                                                                                                                                                                                                                                                                                                                                                                                                                                                                                                                                                                                                                                                                                                                                                                                                                                                                                                                                                                                                                                                                                                                                                                                                                                                                                                                                                                                                                                                                                                                                                                                                                                                                                                                                                                                                                                                                                                                                                                                                                                                                                                                                                                                                                                                                                                                                                                                                                                                                                                                                                                  |
|                                                | Miguel Carneiro                                                                                                                                                                                                                                                                                                                                                                                                                                                                                                                                                                                                                                                                                                                                                                                                                                                                                                                                                                                                                                                                                                                                                                                                                                                                                                                                                                                                                                                                                                                                                                                                                                                                                                                                                                                                                                                                                                                                                                                                                                                                                                                                                                                                                                                                                                                                                                                                                                                                                                                                                                                                                                                                                                                                                    |
|                                                | Nuno Ferrand                                                                                                                                                                                                                                                                                                                                                                                                                                                                                                                                                                                                                                                                                                                                                                                                                                                                                                                                                                                                                                                                                                                                                                                                                                                                                                                                                                                                                                                                                                                                                                                                                                                                                                                                                                                                                                                                                                                                                                                                                                                                                                                                                                                                                                                                                                                                                                                                                                                                                                                                                                                                                                                                                                                                                       |
|                                                | Marc R Wilkins                                                                                                                                                                                                                                                                                                                                                                                                                                                                                                                                                                                                                                                                                                                                                                                                                                                                                                                                                                                                                                                                                                                                                                                                                                                                                                                                                                                                                                                                                                                                                                                                                                                                                                                                                                                                                                                                                                                                                                                                                                                                                                                                                                                                                                                                                                                                                                                                                                                                                                                                                                                                                                                                                                                                                     |
|                                                | Fernando Sequeira                                                                                                                                                                                                                                                                                                                                                                                                                                                                                                                                                                                                                                                                                                                                                                                                                                                                                                                                                                                                                                                                                                                                                                                                                                                                                                                                                                                                                                                                                                                                                                                                                                                                                                                                                                                                                                                                                                                                                                                                                                                                                                                                                                                                                                                                                                                                                                                                                                                                                                                                                                                                                                                                                                                                                  |
|                                                | Lee A Rollins                                                                                                                                                                                                                                                                                                                                                                                                                                                                                                                                                                                                                                                                                                                                                                                                                                                                                                                                                                                                                                                                                                                                                                                                                                                                                                                                                                                                                                                                                                                                                                                                                                                                                                                                                                                                                                                                                                                                                                                                                                                                                                                                                                                                                                                                                                                                                                                                                                                                                                                                                                                                                                                                                                                                                      |
|                                                | Edward C Holmes                                                                                                                                                                                                                                                                                                                                                                                                                                                                                                                                                                                                                                                                                                                                                                                                                                                                                                                                                                                                                                                                                                                                                                                                                                                                                                                                                                                                                                                                                                                                                                                                                                                                                                                                                                                                                                                                                                                                                                                                                                                                                                                                                                                                                                                                                                                                                                                                                                                                                                                                                                                                                                                                                                                                                    |
|                                                | Richard Shine                                                                                                                                                                                                                                                                                                                                                                                                                                                                                                                                                                                                                                                                                                                                                                                                                                                                                                                                                                                                                                                                                                                                                                                                                                                                                                                                                                                                                                                                                                                                                                                                                                                                                                                                                                                                                                                                                                                                                                                                                                                                                                                                                                                                                                                                                                                                                                                                                                                                                                                                                                                                                                                                                                                                                      |
|                                                | Peter A White                                                                                                                                                                                                                                                                                                                                                                                                                                                                                                                                                                                                                                                                                                                                                                                                                                                                                                                                                                                                                                                                                                                                                                                                                                                                                                                                                                                                                                                                                                                                                                                                                                                                                                                                                                                                                                                                                                                                                                                                                                                                                                                                                                                                                                                                                                                                                                                                                                                                                                                                                                                                                                                                                                                                                      |
| <b>Order of Authors Secondary Information:</b> |                                                                                                                                                                                                                                                                                                                                                                                                                                                                                                                                                                                                                                                                                                                                                                                                                                                                                                                                                                                                                                                                                                                                                                                                                                                                                                                                                                                                                                                                                                                                                                                                                                                                                                                                                                                                                                                                                                                                                                                                                                                                                                                                                                                                                                                                                                                                                                                                                                                                                                                                                                                                                                                                                                                                                                    |
| <b>Response to Reviewers:</b>                  | <p>Please note that text within quotation marks is new or amended text taken directly from the revised manuscript.</p> <p>1. Where I think the authors fall short is on not reporting any insights about (or derived from) the genome (aside from repeat content), despite having the first-hand look at it. It is a data note and therefore no requirements for biological analyses, but surely something can be said about the genes you have predicted? E.g. any gene families stand out? Are there genes in your genome draft that could explain, at least partially, the enormous success this species has in non-native environments? For instance, what is known about the gene(s) involved in the production of the toxic secretions you mentioned? Are there any clues from the resources you are sharing with the community?</p> <p>We have had an incredible amount of interest from researchers with requests for access to this genome assembly for further biological studies. Thus, the main driving factor for submission was to make our data publicly available for more detailed analysis by the scientific community. Given that this is a data note, we believe that comprehensive biological analyses are best suited for follow-up publications. Further analysis will delay publication and prevent sharing of this highly petitioned dataset. However, we have released the genome in a WebApollo genome browser and included additional analysis of the predicted proteins, which will hope will encourage community annotation and curation of the genome which will aid such biological analyses (lines 286-291):</p> <p>"Future work will be needed to improve the quality of gene annotation. We have included all of the MAKER2 predictions in our annotation and a full table of protein statistics and top blastp hits from this analysis for further biological analyses (Table S3). Annotation has also been made available via a WebApollo [53] genome browser (<a href="http://edwapollo.babs.unsw.edu.au/">http://edwapollo.babs.unsw.edu.au/</a>) and an associated search tool (<a href="http://www.slimsuite.unsw.edu.au/servers/apollo.php">http://www.slimsuite.unsw.edu.au/servers/apollo.php</a>). This will facilitate community curation and annotation of genes of interest."</p> <p>2. I look at the supporting data available on the FTP server and everything checks out. I do have a recommendation for an additional file (see below).</p> <p>We have added a high-confidence gene set as recommended (see point 4, below).</p> <p>3. The authors claim that the draft genome "sets a milestone in the field of anuran genetics". I would like the authors to describe why it is so, in their conclusion.</p> |

Both reviewer 1 and 3 have made a comment regarding the use of the word "milestone". This has been omitted from the sentence.

4. Typically, for genome papers, a high-confidence gene set is also reported/provided (in addition to what is presented, often based on AED and other criteria). A high confidence set would be a very useful resource to have, reduce the gene space in the process and present a more focused, gold standard list of better-annotated genes. This set stands a higher chance of yielding valuable and meaningful insights for your and future studies, set that would hold against scientific scrutiny (In the process weeding out the many, potentially spurious, gene predictions reported herein).

We have created a high confidence gene set as recommended by the reviewer. This is based on MAKER2 Annotation Edit Distance (AED) and reciprocal high coverage BLAST hits to reference proteomes. We have also generated a table (Supplementary Table S4) with additional supporting data for each predicted gene to make it easier for users to identify subsets that meet confidence criteria appropriate to their own goals. The high confidence gene set has been uploaded to GigaDB (lines 291-294):

"For researchers who would like to use cane toad proteins in general evolutionary analyses, we have also created a "high quality" dataset of 6,580 protein-coding genes with an AED no greater than 0.25 and at least 90% reciprocal coverage of its top QFO blastp hit, excluding possible viral and transposon proteins, available from the GigaScience database."

As an additional resource, we have generated predicted orthologue multiple sequence alignments and maximum likelihood trees for this high quality proteins, which have also been uploaded to GigaDB. A phylogenetic supertree (Figure 8 & Figure S1) has been constructed from these trees and replaced the tree in Fig 1B, which had been made from published data. This is described in a new results section, "Phylogenetic analysis of high quality proteins" (lines 295-310):

"To further validate the high-quality protein data set, GOPHER [54] v3.4.2 was used to predict orthologues for each protein. QFO (04/18) [52] eukaryotic reference proteomes were supplemented with Uniprot Reference proteomes for *Lithobates catesbeiana* (UP000228934) [14] and *Xenopus laevis* (UP000186698) [17] and the annotated protein sequences of *Nanorana parkeri* v2 [15]. GOPHER orthologues were predicted with default settings based on a modified mutual best hit algorithm that accounts for one-to-many or many-to-many orthologous relationships and retains the closest orthologue from each species. The closest orthologues were aligned with MAFFT [55] v7.310 (default settings) and phylogenetic trees inferred with IQ-TREE [56] v1.6.1 (default settings) for alignments containing at least three sequences. Phylogenetic trees were inferred in this manner for 6,417 of the 6,580 high quality proteins. A supertree was then constructed from the 6,417 individual protein trees using CLANN [57] v4.2.2 (DFIT Most Similar Supertree Algorithm) (Figure 8, Figure S1). Branch consistency was calculated for each branch as the proportion of source trees with taxa either side of the branch that have no conflicts in terms of the placement of those taxa. The supertree supports the known phylogeny for amphibians used in this study, giving additional confidence in the quality and utility of these protein annotations. All alignments and trees are available in supplementary data via the GigaScience database."

5. The sentence on line 240 starting with "Critically.." is not accurate and needs to be re-worked. FYI some short read assemblers are able to assemble through repeats larger than read length with the help of paired-end information. You could rephrase to something like "The average length (XX +/- Std. dev.) of most (XX%) of these repeat classes exceeds that of the Illumina reads used in our study (Paired-end 150bp), making the short read assembly difficult in these regions. This is reflected by the low assembly contiguity (contig N50 length = 583bp)."

We agree with the reviewer that this sentence over-states the problems presented to short read assembly and have rephrased that sentence (now lines 316-319):

"The mean repeat length is 406 bp, which exceeds the Illumina read length used in our study (mean 140.6 bp paired-end). This makes short-read assembly of these regions difficult, as reflected by the poor ABySS contiguity (contig N50 = 583 bp, Table 2), and emphasises the need for long read data in this organism."

6. Though I must say that such a low contiguity figure is very untypical for an ABySS assembly, even for a highly repeated genome. Especially since your library captures sizes as long as 800bp. I am concerned about gDNA content/representation, as you seem to only have constructed a single paired-end library. Building multiple libraries from the same tissue source, preferably from 2 or more samples, prevent possible sampling/lab manipulation biases and ensures you have captured the entire genomic content. I also recommend building libraries of various insert sizes: 500, 2kbp, 5kbp whenever possible, especially when it is your only source of long-range information for assembly. This helps short read assemblers resolve repeats and increase the contiguity of the resulting assembly. Since you mainly used the ABySS short-read assembly for improving the accuracy of the DBG2OLC long read one, it might be ok in this case (especially since you recover many complete BUSCOs), but it also explains why a hybrid assembly approach does not improve the N50 length metric of the long-read DBG2OLC assembly - where I think it should.

We agree with the reviewer that the ABySS assembly is not as good as one might expect given its performance in other species. This was reflected by comparatively poor performance by other short read assembly attempts. We have had much better success using the same library preparation, PE strategy and ABySS assembly in other species. We think that the difficulties we've experienced whilst attempting to assemble the genome from short read data is most probably related to its high repeat content (see point 5, above). We acknowledge that it could also be influenced by gDNA representation, although the high BUSCO coverage gives us confidence of good coverage.

We agree that multiple insert sizes have improved the short-read assembly. However, we decided that generating more long read data was more useful. The reviewer is correct that we "mainly used the ABySS short-read assembly for improving the accuracy of the DBG2OLC long read one". We acknowledge that this is not a final, complete cane toad genome, and trust that future sequencing efforts will be able to improve upon our assembly. Despite this, the draft genome in its current state will be enormously useful to the community.

7. The cane toad reference transcriptome was published by the Authors and used as direct evidence for MAKER gene prediction. The Authors briefly mentioned it as a "multi-tissue" from tadpoles and adults. It would be good to provide more information (2-3 sentences) on this evidence in the present study (so readers readily know what went in the gene prediction tools), especially if that information could be used to gain insights on cane toad genetics.

The following sentence has been added to the MS (lines 211-213).

"Whole-tadpoles and the brain, liver, spleen, muscle, ovary and testes of adult toads from Australia and Brazil were used to prepare cDNA libraries for the multi-tissue transcriptome sequencing."

8. line 219, typo, should read "Approximately"

This has been fixed in the manuscript.

9. Make sure you report to single digit (or double) consistently, throughout.

Table 2 has been fixed to give all percentage values to 1 d.p. Elsewhere, we have tried to consistently use the number of significant figures or decimal places that we consider to be appropriate for given values.

Reviewer #2

1. Although BUSCO analysis can be used for genome completeness, it is based on protein coding genes, so I think 'Assessment of genome completeness' would be better to be merged with 'Genome annotation and gene prediction' section.

We respectfully disagree with the reviewer on this point. BUSCO is a set of software and data for "assessing genome assembly and annotation completeness with single-copy orthologs". An explicit objective of the tool is assessing genome completeness. It is also an important part of our manuscript's narrative that our draft genome is capturing the majority of protein-coding regions well, despite being quite fragmented when contig statistics alone are considered. However, we acknowledge that BUSCO can also be used to assess annotation completeness and have added the BUSCO short score for the MAKER2 gene set to the 'Genome annotation and gene prediction' section, along with more discussion of observed differences (see point 2, below).

2. In previous publication with *R. marina* transcriptome (Richardson, et al., GigaScience, 2018; doi: 10.1093/gigascience/gix114; Ref #18 on current manuscript), it was reported that 1.7% of BUSCO genes were fragmented, and 7.4% of them were missing on their 62,202 CDS transcripts. These numbers look better than genome-based result described in this manuscript (7.5% of fragmented, and 9.5% of missing). Authors may need to discuss the difference among these two annotations.

These differences are consistent with results from the BUSCO manuscript, in which it states: "Nevertheless, the fact that some genome assemblies appear less complete than their corresponding gene sets (e.g. *H. sapiens* Table 1) reveals limitations of the BUSCO gene prediction step." ... "Thus, it should be noted that while BUSCO assessments aim to robustly estimate completeness of the datasets, technical limitations (particularly gene prediction) may inflate proportions of 'fragmented' and 'missing' BUSCOs, especially for large genomes." Deeper analysis of our BUSCO results to confirm this have now been included in the discussion of BUSCO results.

Lines 153-158: "It should be noted that these numbers mask some underlying complexity of BUSCO assessments; aggregate improvements in BUSCO scores with polishing include some losses as well as gains. Taking the best rating for each BUSCO in v2.0, v2.1 or v2.2 reduces the number of missing BUSCO genes to 326 (8.3%) and increases the complete number to 3366 (85.2%) (Figure 3, "*R. marina* (combined)"). This is explored further in the "Genome annotation and prediction" section, below."

Lines 270-285: "We ran BUSCO v2.0.1 (short mode, lineage tetrapoda\_odb9, BLAST+ v2.2.31 [28], HMMer v3.1b2 [29], AUGUSTUS v3.2.2 [30], EMBL v6.5.7 [31]) on the MAKER2 transcriptome and proteome and retained the most complete rating for each gene (Figure 7A, Table S2, "Annotation"). MAKER annotation had fewer missing BUSCO genes than the v2.2 assembly (314 vs 375) but many more fragmented (561 vs 296). Equivalent BUSCO analysis of the Richardson et al. transcriptome [18] was only missing 296 genes. However, as seen with the assembly versions, these values mask hidden complexity. Combined BUSCO analysis of our hybrid assembly (v2.0, v2.1, v2.2) and annotation, revealed only 181 missing genes (Figure 7A, Table S2, "GigaDB"). Furthermore, >50% of the 279 genes "Missing" in the transcriptome are found in the genome and/or its annotation (Figure 7B, Table S2). When the transcriptome and our genome are combined, only 68 BUSCO genes (1.7%) are "Missing" and 3845 (97.3%) are "Complete" (Figure 7B, Table S2, "CaneToad"). This highlights the usefulness of our assembly, and illustrates the complementary nature of genome and transcriptome data: the former is more comprehensive but more difficult to assemble and annotate, whereas the latter is easier to assemble into full-length coding sequences but will miss some tissue-specific and lowly expressed genes. Some of the remaining "Missing" BUSCO genes may be present but too fragmented to reach the score threshold."

3.The analysis of 'unknown function' genes with published de novo transcriptome (p.9 line 229-) seems to have a circularity. Authors used all RNA-seq data already on their annotation, which are also used for de novo transcriptome construction (p.9 line 206). So instead of analyzing their matched length, I recommend to analyze their expression level from RNA-seq data. If 'unknown function' genes were mis-annotated genes as authors thought, it should have lower level of evidence for expression, compared to 'known function' genes.

We disagree with the reviewer that there is circularity in our argument. The same RNA-Seq data was used for prediction of both annotated and "unknown function" genes, so there is no reason for any difference in how well different subsets of predicted genes map to the transcriptome. (The transcriptome data was not pre-filtered at any step based on annotation.) Nevertheless, we agree that it is useful to look at expression levels. This has been incorporated into our extended analysis of the predicted genes (lines 247-254):

"We also reanalysed the multi-tissue RNA-Seq data from Richardson et al. [18] by mapping the reads onto the MAKER predicted transcripts. Filtered reads (adaptor sequences and reads with avg. Phred < 30 removed) were mapped with Salmon v0.8.0 [51] (Quasi-mapping default settings, IU libtype parameter). Read counts were converted into transcripts per million (TPM) by normalising by transcript length, dividing by the sum of the length-normalised read counts, and then multiplying by one million. We observed lower expression levels overall in the "unknown" set (Figure 6). With the caveat that real proteins may have very low expression, this is also consistent with the "unknown" gene set containing false annotations."

4.'3 s.f (significant figure) notation on table headers make the reader confused. It is obvious to recognize by looking at numbers on table, so it would be better to remove it.

Reviewer 3 disagrees with this reviewer and has asked to place the shorthand 's.f.' in the abbreviation list. We have kept 's.f.' in the manuscript.

5.In Table 4, qPCR value is also the average of two experiments (p.8, line 190-191), so it would be fair to present min/max values for that.

These have now been included in the main text (line 193-195):

"Genome sizes were generated from the formulae outlined by [41] and the average of two estimates (2.81 Gb and 1.94 Gb) were used to obtain a genome size of 2.38 Gb."

#### Reviewer #3

1.p. 11; line 226: The authors identified 32,456 genes with unknown function in addition to the 25,846 predicted genes. The number of these unknown genes seem to much more than expected, but their explanation for it is insufficient. They mentioned that the median length is 171 aa, but what is the cut-off length of amino acids, and what is their range (the minimum and maximum)? In which regions in the genome sequence are those genes located? That is, are those genes scattered in the unique sequence in the genome or localized in the regions with repetitive sequences, transposable elements, or some other specific sequences? If the authors use the same strategy of pipelines for gene annotation with the *X. laevis* and *X. tropicalis* genome sequences, how many genes with unknown function could be identified and what percentage of them could be orthologous to those of *R. marina*?

We have expanded our analysis of the predicted genes, including analysis on the number of genes with of unknown function which have homologues in the *Xenopus tropicalis* reference proteome. (See also responses to Reviewer 1 (point 4), and Reviewer 2 (points 2 and 3).

Lines 235-242: "Further review of the predicted protein descriptions revealed 4,357 with likely origins in transposable elements (including 4,114 LINE-1 ORFs) and 215 from viruses, however many of these may be bona fide functional members of the cane toad proteome.

Poor quality protein predictions are generally shorter (generated from fragmented or random ORFs) and have a larger Annotation Edit Distance (AED) when compared to real proteins. Consistent with this, the predicted proteins of unknown function are shorter in sequence (median length 171 aa) to those with Swissprot hits (median length 388 aa) (Figure 5A) and have a greater AED (median 0.37 versus 0.2) (Figure 5B)."

Lines 255-269: "To investigate the role of fragmented ORFs, we downloaded the Quest For Orthologues (QFO) reference proteomes (QFO 04/18) [52] and used BLAST+ v2.2.31 [28] blastp (e-value < 10<sup>-7</sup>) to identify the top hit for each predicted protein in (a) all eukaryote reference proteomes, and (b) the *Xenopus tropicalis* reference proteome. BLAST results were converted into global coverage with GABLAM v2.28.3 [50]. As expected, the vast majority (99.6%) of "similar" proteins had a blastp hit the QFO proteomes (data not shown). Perhaps surprisingly, nearly two thirds (66.5%) of "unknown" proteins also had a blastp hit, but these had lower coverage of the reference proteins than did proteins in the "similar" class (data not shown). A "combined coverage" score was calculated for each protein, taking the minimum percentage coverage of either the query protein or its top QFO hit. This metric was related to annotation quality, showing an inverse relationship with AED (data not shown). Excluding proteins with annotation indicating possible viral or transposable element origin, 45.7% of "similar" proteins and 96.8% of "unknown" proteins had the same closest *X. tropicalis* blastp hit as another predicted protein. Consistent with this being related to gene fragmentation, there was a negative relationship between the number of cane toad proteins sharing a given *X. tropicalis* top hit, and how much of the *X. tropicalis* hit was covered by each cane toad protein."

Re-annotation of the *Xenopus* genomes would be a major undertaking and is beyond the scope of this paper.

2. Figure 5: The authors need to compare the data in Figure 5 with those of other amphibian species.

We agree with the reviewer that such a comparison would be interesting, but disagree that it is necessary. We are currently unable to generate the required data with sufficient rigor to be confident of a fair comparison and this is not the direct focus of the Data Note.

3. Is *Rhinella marina* the same as *Rhinella marinus* and *Bufo marinus*? The authors need to describe this in the abstract and introduction for clarification.

They are the same organism. *Bufo marinus* is an old scientific descriptor and has been replaced with *Rhinella marina*. This has been clarified in the abstract (line 52) and the introduction (line 76).

4. The genome size usually means the size of haploid DNA, but, in the text and table, the authors mentioned "a haploid genome size." When the authors simply use "the genome size," does this mean "a haploid genome size?" If so, better not to use "a haploid genome size."

"haploid genome size" has been changed to "genome size" throughout the manuscript.

5. p. 10, line 179: If PCR conditions are nothing special, those could be written in the legend of Tables or Figures, or deposited to "protocol.io."

PCR conditions have been moved to the legend of Table S1.

6. The authors should include s.f. and other abbreviations, if any, that are not listed, in the list of abbreviations.

AED, BLAST, HMM, lncRNA, ORF, QFO, TE, TPM, and s.f. have been added to the abbreviations list.

Reviewer #4

1. The authors take a hybrid assembly approach and mix a single sized 350 bp fragment Illumina library with larger fragment PacBio libraries. They extracted DNA from liver from an adult female. Liver is known to endoreduplicate, which can create rearrangements and problems for de novo assembly projects. However, BUSCO analysis indicates that many of the single genes have been identified in the assembly and their results are comparable to *X. tropicalis*, arguably the most well assembled and annotated amphibian genome available.

We agree with the reviewer that the BUSCO analysis is sound and that our results compare well with *X. tropicalis* and we hope to improve our assembly in the near future by sequencing of variety of tissue types. See also response to reviewer 1, point 6.

2. They used ABySS to assemble the genome but given that this genome note format is highly technical, it might be useful to report comparisons with other assemblers that they no doubt tried and/or provide more explanation for using ABySS relative to other assemblers.

We believe such comparisons are more appropriate for a technical note than a data note. The reviewer is correct that multiple assemblies and options were tried. However, we do not feel confident that we can use these data to provide robust technical insight.

3. Regarding their metrics in Table 2. I was confused by the %N reporting for their assembly and long read libraries. The authors report 0.0% of the assembly is in gaps, which is surprising given how repetitive amphibian genomes are, how poorly assembled the toad genome is (though comparably poor to other amphibians which have Ns) and nearly all vertebrate genome assemblies (including the human genome) have some bases unresolved and/or in gaps marked by a series of Ns. The proportion in gaps is an important metric of assembly quality. If the genome really does not have any Ns, it might be useful to highlight this unique attribute somewhere in the text and provide some explanation for how they were able to eliminate gaps.

The hybrid assembly produced is primarily error-corrected long read contigs, not scaffolds. As such, the lack of Ns represents an inability of the hybrid assembler to scaffold the contigs using the ABySS assembly (see reviewer 1, point 6), rather than gap elimination.

4. Their k-mer genome size estimation analysis shows the effect of kmer size and quality trimming but remains far from the estimated genome size based on flow cytometry and other experiments. The authors follow this up with a nice qPCR experiment and provide explanation for how far they are off. Given that the genome assembly size deviates substantially from the reported size, I would worry about using this assembly to analyze repeat content (as the authors state in the manuscript).

We agree with the reviewer's reservations. We report the repeat content of the assembly, not the genome. We explicitly do not claim that this assembly is a final and completely accurate representation of the true genome sequence. We draw attention to the difficulty that the repeats present for accurate assembly.



5.As an additional confirmatory experiment to help build confidence in their results, I wonder if a syntenic analysis with *Xenopus tropicalis* would be useful. Such a comparison might help reveal more about overall syntenic and/or continuity and further strengthen their assembly results.

This is a great idea but beyond the scope of this paper.

6.Line 193-199: Here there is discussion about first estimate of genome size using either k-mer or qPCR analysis. This is not the first genome size estimate based on kmer distributions. Perhaps the authors want to state that this is the first amphibian genome estimated in this way? Maybe downplaying this sentence, or more clearly defining what they want to say here would be useful.

This sentence has been modified as per the reviewer's suggestion for better clarity (lines 199-200):

"Given this is the first estimate of the cane toad genome size using either k-mer or qPCR analysis, ..."

7.There are a number of sentences in the text that oversell the results a bit and these should be corrected (for example: line 54-55---consider eliminating the line about iconic status and major gaps in understanding cane toad genetics.....this is the case for nearly all organisms; line 248---the fragmented draft assembly, early stage protein-coding annotation results, and estimates that deviate from expectation is contributing to additional fragmented amphibian assemblies; a milestone should go further than what is reported in the manuscript).

Line 54-55: in our opinion this is not over-selling. No results have been presented and only facts are stated.

Line 248 (now line 326): we agree with the reviewer and the sentence has been modified to remove 'milestone'.

8.The authors use MAKER2 for their gene annotation pipeline combined with their reference transcriptome. Given their abundant RNA-Seq, I was surprised that they did not use BRAKER1, which typically provides superior annotations compared to MAKER2. This might explain why it appears they have highly over-predicted the number of genes in the toad genome, though it could also stem from poor assembly. MAKER is widely used but their abundant RNA-Seq data is perfect for using BRAKER1 and they may obtain superior annotations using this tool.

We did consider BRAKER1 during the annotation phase. It is our understanding that later releases of Maker perform just as well as BRAKER1, with the additional benefit of repeat masking and protein alignments which BRAKER does not generate. We hope that making the data freely available, others will be able to improve on the annotations in time. To aid with this endeavour, we have also released the genome in a WebApollo genome browser, as pointed out in the response to point 1 by reviewer 1.

9.In some locations of the text, genus and species are italicized, in other locations they are not. Fix according to journal format requirements.

This has been fixed throughout the manuscript.

**Additional Information:**

**Question**

**Response**

Are you submitting this manuscript to a special series or article collection?

No

|                                                                                                                                                                                                                                                                                                                                                                                                                                                                                                                                                         |            |
|---------------------------------------------------------------------------------------------------------------------------------------------------------------------------------------------------------------------------------------------------------------------------------------------------------------------------------------------------------------------------------------------------------------------------------------------------------------------------------------------------------------------------------------------------------|------------|
| <p><b>Experimental design and statistics</b></p> <p>Full details of the experimental design and statistical methods used should be given in the Methods section, as detailed in our <a href="#">Minimum Standards Reporting Checklist</a>. Information essential to interpreting the data presented should be made available in the figure legends.</p> <p>Have you included all the information requested in your manuscript?</p>                                                                                                                      | <p>Yes</p> |
| <p><b>Resources</b></p> <p>A description of all resources used, including antibodies, cell lines, animals and software tools, with enough information to allow them to be uniquely identified, should be included in the Methods section. Authors are strongly encouraged to cite <a href="#">Research Resource Identifiers</a> (RRIDs) for antibodies, model organisms and tools, where possible.</p> <p>Have you included the information requested as detailed in our <a href="#">Minimum Standards Reporting Checklist</a>?</p>                     | <p>Yes</p> |
| <p><b>Availability of data and materials</b></p> <p>All datasets and code on which the conclusions of the paper rely must be either included in your submission or deposited in <a href="#">publicly available repositories</a> (where available and ethically appropriate), referencing such data using a unique identifier in the references and in the “Availability of Data and Materials” section of your manuscript.</p> <p>Have you have met the above requirement as detailed in our <a href="#">Minimum Standards Reporting Checklist</a>?</p> | <p>Yes</p> |

[Click here to view linked References](#)

GigaScience: Data Note

1 **Draft genome assembly of the invasive cane toad, *Rhinella marina***

2 **Richard J Edwards<sup>1</sup>, Daniel Enosi Tuipulotu<sup>1†</sup>, Timothy G Amos<sup>1†</sup>, Denis O'Meally<sup>2</sup>, Mark F**  
3 **Richardson<sup>3,4</sup>, Tonia L Russell<sup>5</sup>, Marcelo Vallinoto<sup>6,7</sup>, Miguel Carneiro<sup>6</sup>, Nuno Ferrand<sup>6,8,9</sup>, Marc**  
4 **R Wilkins<sup>1,5</sup>, Fernando Sequeira<sup>6</sup>, Lee A Rollins<sup>3,10</sup>, Edward C Holmes<sup>11</sup>, Richard Shine<sup>12</sup> and**  
5 **Peter A White<sup>1,\*</sup>**

6  
7 †These authors contributed equally to the work.

8  
9 <sup>1</sup>School of Biotechnology and Biomolecular Sciences, University of New South Wales, Sydney, NSW,  
10 Australia

11 <sup>2</sup>Sydney School of Veterinary Science, Faculty of Science, University of Sydney, Camperdown, New  
12 South Wales, Australia

13 <sup>3</sup>School of Life and Environmental Sciences, Centre for Integrative Ecology, Deakin University,  
14 Geelong, VIC, Australia

15 <sup>4</sup>Bioinformatics Core Research Group, Deakin University, Geelong, VIC, Australia

16 <sup>5</sup>Ramaciotti Centre for Genomics, University of New South Wales, Sydney, NSW, Australia

17 <sup>6</sup>CIBIO/*InBIO*, Centro de Investigação em Biodiversidade e Recursos Genéticos, Universidade do  
18 Porto, Vairão, Portugal

19 <sup>7</sup>Laboratório de Evolução, Instituto de Estudos Costeiros (IECOS), Universidade Federal do Pará,  
20 Bragança, Pará, Brazil

21 <sup>8</sup>Departamento de Biologia, Faculdade de Ciências, Universidade do Porto, Porto, Portugal

22 <sup>9</sup>Department of Zoology, Faculty of Sciences, University of Johannesburg, Auckland Park, South  
23 Africa

24 <sup>10</sup>Evolution and Ecology Research Centre, School of Biological Earth and Environmental Sciences,  
25 University of New South Wales, Sydney, NSW, Australia

26 <sup>11</sup>Marie Bashir Institute for Infectious Diseases and Biosecurity, Charles Perkins Centre, School of Life  
27 and Environmental Sciences and Sydney Medical School, University of Sydney, Sydney, NSW,  
28 Australia

29 <sup>12</sup>School of Life and Environmental Sciences, Faculty of Science, University of Sydney, Camperdown,  
30 New South Wales, Australia

31  
32 Emails of all authors: richard.edwards@unsw.edu.au (RJE), d.enedi@unsw.edu.au (DET),  
33 t.amos@unsw.edu.au (TGA), omeally@gmail.com (DO), m.richardson@deakin.edu.au (MFR),  
34 t.russell@unsw.edu.au (TLR), mvallinoto@cibio.up.pt (MV), miguel.carneiro@cibio.up.pt (MC),  
35 nferrand@cibio.up.pt (NF), m.wilkins@unsw.edu.au (MRW), fsequeira@cibio.up.pt (FS),  
36 l.rollins@unsw.edu.au (LAR), edward.holmes@sydney.edu.au (ECH), rick.shine@sydney.edu.au  
37 (RS), p.white@unsw.edu.au (PAW).

38  
39 \*Corresponding author address: School of Biotechnology and Biomolecular Sciences, University of  
40 New South Wales, Sydney, NSW, Australia. Tel: +61-293853780; Email: [p.white@unsw.edu.au](mailto:p.white@unsw.edu.au)

## 51 Abstract

52 **Background:** The cane toad (*Rhinella marina* formerly *Bufo marinus*) is a species native to Central  
53 and South America that has spread across many regions of the globe. Cane toads are known for their  
54 rapid adaptation and deleterious impacts on native fauna in invaded regions. However, despite an iconic  
55 status, there are major gaps in our understanding of cane toad genetics. The availability of a genome  
56 would help to close these gaps and accelerate cane toad research. **Findings:** We report a draft genome  
57 assembly for *R. marina*, the first of its kind for the Bufonidae family. We used a combination of long  
58 read PacBio RS II and short read Illumina HiSeq X sequencing to generate a total of 359.5 Gb of raw  
59 sequence data. The final hybrid assembly of 31,392 scaffolds was 2.55 Gb in length with a scaffold  
60 N50 of 168 kb. BUSCO analysis revealed that the assembly included full length or partial fragments of  
61 90.6% of tetrapod universal single-copy orthologs (n=3950), illustrating that the gene-containing  
62 regions have been well-assembled. Annotation predicted 58,302 protein coding genes, with 25,846  
63 similar to known proteins in SwissProt. Repeat sequences were estimated to account for 63.9% of the  
64 assembly. **Conclusion:** The *R. marina* draft genome assembly will be an invaluable resource that can  
65 be used to further probe the biology of this invasive species. Future analysis of the genome will provide  
66 insights into cane toad evolution and enrich our understanding of their interplay with the ecosystem at  
67 large.

68  
69 **Keywords:** cane toad; *Rhinella marina*; sequencing; hybrid assembly; genome; annotation

## 74 **Data Description**

### 75 **Introduction**

76 The cane toad (*Rhinella marina* formerly *Bufo marinus*) (Figure 1) is a true toad (Bufonidae) native to  
77 Central and South America that has been introduced to many areas across the globe [1]. Since its  
78 introduction into Queensland in 1935, the cane toad has spread widely and now occupies more than 1.2  
79 million square kilometres of the Australian continent, fatally poisoning predators like the northern quoll,  
80 freshwater crocodiles, and several species of native lizards and snakes [1-5]. The ability of cane toads  
81 to kill predators with toxic secretions has contributed to the success of their invasion [1]. To date,  
82 research on cane toads has focused primarily on ecological impacts, rapid evolution of phenotypic traits,  
83 and population genetics using neutral markers [6, 7], with limited knowledge of the genetic changes  
84 that allow the cane toad to thrive in the Australian environment [8-11]. A reference genome will be  
85 useful for studying loci subject to rapid evolution and could provide valuable insights into how invasive  
86 species adapt to new environments. Amphibian genomes have a preponderance of repetitive DNA [12,  
87 13], confounding assembly with the limited read lengths of first- and second-generation sequencing  
88 technologies. Here, we employ a hybrid assembly of PacBio long reads and Illumina short reads (Figure  
89 2) to overcome assembly challenges presented by the repetitive nature of the cane toad genome. Using  
90 this approach, we assembled a draft genome of *R. marina* that is comparable in contiguity and  
91 completeness to other published anuran genomes [14-17]. We used our previously published  
92 transcriptomic data [18] and other published anuran sequences to annotate the genome. Our draft cane  
93 toad assembly will serve as a reference for genetic and evolutionary studies, and provides a template  
94 for continued refinement with additional sequencing efforts.

### 95 **Sample collection, library construction and sequencing**

96 Adult female cane toads were collected by hand from Forrest River in Ombulgurri, WA (15.1818°S,  
97 127.8413°E) in June 2015. Toads were placed in individual damp cloth bags and transported by plane  
98 to Sydney, NSW before they were anaesthetised by refrigeration for four hours and killed by subsequent  
99 freezing. High-molecular weight genomic DNA (gDNA) was extracted from the liver of a single female

100 using the genomic-tip 100/G kit (Qiagen, Hilden, Germany). This was performed with supplemental  
101 RNase (Astral Scientific, Taren Point, Australia) and proteinase K (NEB, Ipswich, MA, USA)  
102 treatment, as per the manufacturer's instructions. Isolated genomic DNA was further purified using  
103 AMPure XP beads (Beckman Coulter, Brea, CA, USA) to eliminate sequencing inhibitors. DNA  
104 quantity was assessed using the Quanti-iT PicoGreen dsDNA kit (Thermo Fisher Scientific, Waltham,  
105 MA, USA), DNA purity was calculated using a Nanodrop spectrophotometer (Thermo Fisher  
106 Scientific), and molecular integrity assessed by pulse-field gel electrophoresis.

107 For short read sequencing, a paired-end library was constructed from the gDNA using the TruSeq PCR-  
108 free library preparation kit (Illumina, San Diego, CA, USA). Insert sizes ranged between 200-800 bp.  
109 This library was sequenced ( $2 \times 150$  bp) on the HiSeq X Ten platform (Illumina) to generate  
110 approximately 282.9 Gb of raw data (Table 1). Illumina short sequencing reads were assessed for  
111 quality using FastQC v0.10.1 [19]. Low quality reads filtered were trimmed using Trimmomatic v0.36  
112 [20] with a Q30 threshold (LEADING:30, TRAILING:30, SLIDINGWINDOW:4:30) and a minimum  
113 100 bp read length, leaving 64.9% of the reads generated, of which 75.2% were in retained read pairs.

114 For long read sequencing, we utilised the single-molecule real time (SMRT) sequencing technology  
115 (Pacific Biosciences, Menlo Park, CA, USA). Four SMRTbell libraries were prepared from gDNA  
116 using the SMRTBell template preparation kit 1.0 (Pacific Biosciences). To increase subread length,  
117 either 15-50 kb or 20-50 kb BluePippin size selection (Sage Science, Beverly, MA, USA) was  
118 performed on each library. Recovered fragments were sequenced using P6C4 sequencing chemistry on  
119 the RS II platform (240 min movie time). The four SMRTbell libraries were sequenced on a total of 97  
120 SMRT cells to generate 7,745,233 subreads for a total of 76.6 Gb of raw data. Collectively, short and  
121 long read sequencing produced around 359.5 Gb of data (Table 1).

## 122 **Genome assembly**

123 We employed a hybrid *de novo* whole genome assembly strategy, combining both short read and long  
124 read data. Trimmed Q30-filtered short reads were *de novo* assembled with ABySS v1.3.6 [21] using  
125  $k=64$  and default parameters (contig N50 = 583 bp) (Table 2). Long sequence reads were *de novo*

126 assembled using the program DBG2OLC [22] (k 17 AdaptiveTh 0.0001 KmerCovTh 2 MinOverlap 20  
1 RemoveChimera 1) (contig N50 = 167.04 kbp) (Table 2). Following this, both assemblies were merged  
2  
3  
4 128 together using the hybrid assembler ('sparc') tool of DBG2OLC with default parameters, combining  
5  
6 129 the contiguity of the long read data with the improved accuracy of the high coverage Illumina assembly.  
7  
8  
9 130 This hybrid assembly (v2.0) was twice 'polished' to remove errors. In the first round, the Q30 trimmed  
10  
11 131 Illumina reads were mapped to the hybrid assembly with bowtie v2.2.9 [23] and filtered for proper pairs  
12  
13 132 using samtools v1.3.1 [24]. **Scaffolds** were polished with Pilon v1.21 [25] to generate the second  
14  
15 133 iteration of the assembled genome (v2.1). In the second round, PacBio subreads were mapped to  
16  
17 134 assembly v2.1 for error correction using SMRT analysis software (Pacific Biosciences): PacBio  
18  
19 135 subreads for each library were converted to BAM format with bax2bam v0.0.08 and aligned to the  
20  
21 136 genome using palign v.0.3.0. BAM alignment files were combined using samtools merge v1.3.1 and  
22  
23  
24 137 the **scaffolds** polished with Arrow v2.1.0 to generate the final genome assembly (v2.2). Our final draft  
25  
26 138 assembly of the cane toad genome (v2.2) has 31,392 scaffolds with an N50 of 167 kb (Table 2). The  
27  
28 139 GC content (43.23%) is within 1% of the published estimate of 44.17%, determined by flow cytometry  
29  
30  
31 140 [26].  
32  
33

### 141 **Assessment of genome completeness**

142 BUSCO [27] analysis of conserved single copy orthologues is widely used as a proxy for genome  
143 completeness and accuracy. While direct comparisons are only truly valid within an organism,  
144 comparing BUSCO scores to genomes from related organisms provides a useful benchmark. We ran  
145 BUSCO v2.0.1 (short mode, lineage tetrapoda\_odb9, BLAST+ v2.2.31 [28], HMMer v3.1b2 [29],  
146 AUGUSTUS v3.2.2 [30], EMBOSS v6.5.7 [31]) on each of our assemblies, along with four published  
147 anuran genomes (Figure 3, Table 2). The hybrid assembly combined the completeness of the long read  
148 assembly with the accuracy of the short read assembly, providing an enormous boost in BUSCO  
149 completeness from less than 50% full and partial orthologs to over 90%. Error correction through pilon  
150 and arrow polishing had a positive effect on the BUSCO measurement of genome completeness, with  
151 an increase of 7.8% in the number of full and partial orthologs between v2.0 and 2.2. For the polished  
152 assembly (v2.2), 3279 (83.0%) of the 3950 ultra-conserved tetrapod genes were complete, 296 (7.5%)



153 were fragmentary and 375 (9.5%) were missing. It should be noted that these numbers mask some  
154 underlying complexity of BUSCO assessments; aggregate improvements in BUSCO scores with  
155 polishing include some losses as well as gains. Taking the best rating for each BUSCO in v2.0, v2.1 or  
156 v2.2 reduces the number of missing BUSCO genes to 326 (8.3%) and increases the complete number  
157 to 3366 (85.2%) (Figure 3, “*R. marina* (combined)”). This is explored further in the “Genome  
158 annotation and prediction” section, below. Overall, BUSCO metrics indicate that our draft *R. marina*  
159 genome is approaching the quality and completeness of the widely used anuran amphibian reference  
160 genomes for *X. laevis* (v9.2) [17] and *X. tropicalis* (v9.1) [16] and compares well to the recently  
161 published neobatrachian genomes of *Nanorana parkeri* (v2) [15] and *Lithobates catesbeianus* (v2.1)  
162 [14].

### 163 **Estimation of *R. marina* genome size**

164 Previous reports have estimated the size of the cane toad genome from 3.98-5.65 Gb using either  
165 densitometry or flow cytometry analysis of stained nuclei within erythrocytes, hepatocytes and renal  
166 cells [26, 32-38]. We employed two alternative strategies to measure the genome size, using short read  
167 k-mer distributions and qPCR of single copy genes. K-mer frequencies were calculated for both raw  
168 and trimmed Q30-filtered paired-end short reads (Table 1) with Jellyfish v2.2.3 [39] using  $k=21$  and  
169  $k=23$ , and a maximum k-mer count of 10,000. K-mer distributions were analysed using GenomeScope  
170 [40] with mean read lengths of 148 bp (raw) or 141 bp (Q30) and k-mer coverage cut-offs of 1000 and  
171 10,000 (Table 3, Figure 4). GenomeScope gave genome size estimates ranging from 1.77 Gb to 2.30  
172 Gb with the raw reads giving consistently larger estimates (1.85 Gb to 2.30 Gb) than the trimmed and  
173 filtered reads (1.77 Gb to 2.10 Gb). Estimates of the unique (single copy) region of the genome were  
174 more consistent, ranging from 1.31 Gb to 1.46 Gb, with  $k=23$  estimates 99 Mb (raw) or 80 Mb (Q30)  
175 higher than  $k=21$ . Increasing the GenomeScope maximum k-mer coverage threshold had the greatest  
176 effect on predicted genome size, increasing repeat length estimates by 274 Mb to 385 Mb.  
177 GenomeScope predictions are affected by non-uniform repeat distributions and this difference could  
178 indicate high copy number repeats in the genome that are difficult to model accurately. It is possible  
179 that high frequency repeats with raw sequencing counts exceeding 10,000 are resulting in an

180 underestimate of total repeat length and therefore genome size, compared to the previous densitometry  
181 and flow cytometry predictions.

182 In the second approach, the *zfp292* (zinc finger protein 292) gene was selected from our BUSCO  
183 analysis as a single-copy target for genome estimation by qPCR [41]. First, PCR was used to amplify a  
184 326 bp region of *zfp292* (scaffold 6589, position 345,750-346,075) in a 25  $\mu$ L reaction that contained  
185 50 ng of gDNA, 200  $\mu$ M dNTP, 0.625 units of Taq polymerase (Invitrogen), 10  $\times$  Taq polymerase  
186 buffer (Invitrogen) and 0.4  $\mu$ M of each primer (Table S1). The amplicon was cloned into the pGEM-T  
187 Easy vector (Promega, Madison, WI, USA) and the resultant plasmid was linearised with NdeI before  
188 being serially diluted to generate a qPCR standard ( $10^1$ - $10^9$  copies/ $\mu$ L). To amplify a smaller region  
189 (120 bp) within *zfp292* (scaffold 6589, position 345,858-345,977) gDNA (10-25 ng) or 1  $\mu$ L of the  
190 diluted standards were used as a template for a 20  $\mu$ L qPCR reaction containing 2  $\times$  iTaq SYBR Green  
191 mastermix (BioRad, Hercules, CA, USA) and 0.5  $\mu$ M of each primer (Table S1). Cycle threshold values  
192 obtained for each plasmid dilution were used to generate a standard curve and infer the number of  
193 *zfp292* amplicons generated from the template gDNA of known quantity. **Genome sizes were generated**  
194 **from the formulae outlined by [41] and the average of two estimates (2.81 Gb and 1.94 Gb) were used**  
195 **to obtain a genome size of 2.38 Gb.** This genome size provides an estimated combined 151X sequencing  
196 coverage (119X Illumina and 32X PacBio) (Table 4).

197 Our genome size estimation of 1.98 to 2.38 Gbp is smaller than the 2.55 Gbp assembly size, and differs  
198 significantly from previously published estimates of 4 Gbp or more for this species. We suggest this is  
199 a result of the repetitive nature of the genome (see below). **Given this is the first estimate of the cane**  
200 **toad genome size using either k-mer or qPCR analysis,** further investigations are required to more  
201 clearly understand the discrepancy in our estimates with respect to published genome sizes. Here we  
202 estimate the depth of sequencing coverage using both sequence-based and cytometric genome size  
203 measures (Table 4).

## 204 Genome annotation and gene prediction

205 Annotation of the draft genome was performed using MAKER2 v2.31.6 [42], BLAST+ v2.2.31 [28],  
206 AUGUSTUS v3.2.2 [30], Exonerate v2.2.0 [43], RepeatMasker v4.0.6 [44] (DFAM [45], Library  
207 Dfam\_1.2; RMLibrary v20150807), RepeatModeler v1.0.8 [46] and SNAP v2013-11-29 [47] using all  
208 SwissProt protein sequences (downloaded 2017-02-23)[48] . AUGUSTUS was trained using BUSCO  
209 v2.0.1 (long mode, lineage tetrapoda\_odb9) and a multi-tissue reference transcriptome we previously  
210 generated from tadpoles and six adult cane toad tissues [18] (available from GigaDB [49], Genbank  
211 accession PRJNA383966). **Whole-tadpoles and the brain, liver, spleen, muscle, ovary and testes of adult**  
212 **toads from Australia and Brazil were used to prepare cDNA libraries for the multi-tissue transcriptome**  
213 **sequencing.** After the initial training run, two further iterations of MAKER2 were run using HMMs  
214 from SNAP training created from the previous run. Functional annotation of protein-coding genes  
215 predicted by MAKER2 were generated using Interproscan 5.25-64.0, with the following settings: -dp -  
216 t p -pa -goterms -iplookup -appl TIGRFAM, SFLD, Phobius, SUPERFAMILY, PANTHER, Gene3D,  
217 Hamap, ProSiteProfiles, Coils, SMART, CDD, PRINTS, ProSitePatterns, SignalP\_EUK, Pfam,  
218 ProDom, MobiDBLite, PIRSF, TMHMM. BLAST+ v2.6.0 [28] was used to annotate predicted genes  
219 using all Swissprot proteins (release 2017\_08, downloaded 2017-09-01) [48] using the following  
220 settings: -evaluate 0.000001 -seg yes -soft\_masking true -lcase\_masking -max\_hsps 1.

221 In total, 58,302 protein-coding genes were predicted by the MAKER pipeline with an average of 5.3  
222 exons and 4.3 introns per gene (Table 5). Of these, 5,225 are single exon genes, giving 4.7 introns per  
223 multi-exon gene with an average intron length of 4.08 kb. Predicted coding sequences make up 2.38%  
224 of the assembly. MAKER predicted considerably more than the **approximately** twenty thousand genes  
225 expected for a typical vertebrate genome. There are two likely explanations for this: (1) artefactual  
226 duplications in the genome assembly, either through under-assembly or legitimate assembly of two  
227 heterozygous diploid copies; (2) over-prediction of proteins during genome annotation, including  
228 pseudogenes with high homology to functional genes, **proteins from transposable elements or other**  
229 **repeats, and multiple fragments of open reading frames (ORFs) from the same gene (due to**  
230 **fragmentation of the genome) and lncRNA genes that have been incorrectly assigned a coding sequence.**

231 Of the 3,279 complete BUSCO genes identified (Table 2), only 85 (2.59%) were duplicated. This  
232 suggests that there is not widespread duplication in the assembly. Only 25,846 predicted genes were  
233 annotated as similar to known proteins in SwissProt, with the remaining 32,456 predictions “of  
234 unknown function”. This is consistent with over-prediction being the primary cause of inflated gene  
235 numbers. Further review of the predicted protein descriptions revealed 4,357 with likely origins in  
236 transposable elements (including 4,114 LINE-1 ORFs) and 215 from viruses, however many of these  
237 may be bona fide functional members of the cane toad proteome.

238 Poor quality protein predictions are generally shorter (generated from fragmented or random ORFs)  
239 and have a larger Annotation Edit Distance (AED) when compared to real proteins. Consistent with  
240 this, the predicted proteins of unknown function are shorter in sequence (median length 171 aa) to those  
241 with Swissprot hits (median length 388 aa) (Figure 5A) and have a greater AED (median 0.37 versus  
242 0.2) (Figure 5B). To investigate this further, predicted transcript and protein sequences were searched  
243 against the published *de novo* assembled transcriptome [18] using BLAST+ v2.2.31 [28] blastn or  
244 tblastn (top 10 hits, e-value <  $10^{-10}$ ) and compiled with GABLAM v2.28.3 [50]. For 56.5% of proteins  
245 with functional annotation, 95%+ of the protein length mapped to the top transcript hit (Table 6). Only  
246 27.1% of unknown proteins had 95%+ coverage in the top transcript hit, which is again consistent with  
247 over-prediction. We also reanalysed the multi-tissue RNA-Seq data from Richardson *et al.* [18] by  
248 mapping the reads onto the MAKER predicted transcripts. Filtered reads (adaptor sequences and reads  
249 with avg. Phred < 30 removed) were mapped with Salmon v0.8.0 [51] (Quasi-mapping default settings,  
250 IU libtype parameter). Read counts were converted into transcripts per million (TPM) by normalising  
251 by transcript length, dividing by the sum of the length-normalised read counts, and then multiplying by  
252 one million. We observed lower expression levels overall in the “unknown” set (Figure 6). With the  
253 caveat that real proteins may have very low expression, this is also consistent with the “unknown” gene  
254 set containing false annotations.

255 To investigate the role of fragmented ORFs, we downloaded the Quest For Orthologues (QFO)  
256 reference proteomes (QFO 04/18) [52] and used BLAST+ v2.2.31 [28] blastp (e-value <  $10^{-7}$ ) to identify  
257 the top hit for each predicted protein in (a) all eukaryote reference proteomes, and (b) the *Xenopus*

258 *tropicalis* reference proteome. BLAST results were converted into global coverage with GABLAM  
259 v2.28.3 [50]. As expected, the vast majority (99.6%) of “similar” proteins had a blastp hit the QFO  
260 proteomes (data not shown). Perhaps surprisingly, nearly two thirds (66.5%) of “unknown” proteins  
261 also had a blastp hit, but these had lower coverage of the reference proteins than did proteins in the  
262 “similar” class (data not shown). A “combined coverage” score was calculated for each protein, taking  
263 the minimum percentage coverage of either the query protein or its top QFO hit. This metric was related  
264 to annotation quality, showing an inverse relationship with AED (data not shown). Excluding proteins  
265 with annotation indicating possible viral or transposable element origin, 45.7% of “similar” proteins  
266 and 96.8% of “unknown” proteins had the same closest *X. tropicalis* blastp hit as another predicted  
267 protein. Consistent with this being related to gene fragmentation, there was a negative relationship  
268 between the number of cane toad proteins sharing a given *X. tropicalis* top hit, and how much of the *X.*  
269 *tropicalis* hit was covered by each cane toad protein.

270 We ran BUSCO v2.0.1 (short mode, lineage tetrapoda\_odb9, BLAST+ v2.2.31 [28], HMMer v3.1b2  
271 [29], AUGUSTUS v3.2.2 [30], EMBOSS v6.5.7 [31]) on the MAKER2 transcriptome and proteome  
272 and retained the most complete rating for each gene (Figure 7A, Table S2, “Annotation”). MAKER  
273 annotation had fewer missing BUSCO genes than the v2.2 assembly (314 vs 375) but many more  
274 fragmented (561 vs 296). Equivalent BUSCO analysis of the Richardson *et al.* transcriptome [18] was  
275 only missing 296 genes. However, as seen with the assembly versions, these values mask hidden  
276 complexity. Combined BUSCO analysis of our hybrid assembly (v2.0, v2.1, v2.2) and annotation,  
277 revealed only 181 missing genes (Figure 7A, Table S2, “GigaDB”). Furthermore, >50% of the 279  
278 genes “Missing” in the transcriptome are found in the genome and/or its annotation (Figure 7B, Table  
279 S2). When the transcriptome and our genome are combined, only 68 BUSCO genes (1.7%) are  
280 “Missing” and 3845 (97.3%) are “Complete” (Figure 7B, Table S2, “CaneToad”). This highlights the  
281 usefulness of our assembly, and illustrates the complementary nature of genome and transcriptome data:  
282 the former is more comprehensive but more difficult to assemble and annotate, whereas the latter is  
283 easier to assemble into full-length coding sequences but will miss some tissue-specific and lowly

284 expressed genes. Some of the remaining "Missing" BUSCO genes may be present but too fragmented  
1  
2 285 to reach the score threshold.  
3

4  
5 286 Future work will be needed to improve the quality of gene annotation. We have included all of the  
6  
7 287 MAKER2 predictions in our annotation and a full table of protein statistics and top blastp hits from this  
8  
9 288 analysis for further biological analyses (Table S3). Annotation has also been made available via a  
10  
11 289 WebApollo [53] genome browser (<http://edwapollo.babs.unsw.edu.au/>) and an associated search tool  
12  
13 290 (<http://www.slimsuite.unsw.edu.au/servers/apollo.php>). This will facilitate community curation and  
14  
15 291 annotation of genes of interest. For researchers who would like to use cane toad proteins in general  
16  
17 292 evolutionary analyses, we have also created a "high quality" dataset of 6,580 protein-coding genes with  
18  
19 293 an AED no greater than 0.25 and at least 90% reciprocal coverage of its top QFO blastp hit, excluding  
20  
21 294 possible viral and transposon proteins, available from the *GigaScience* database.  
22  
23  
24  
25

### 26 295 **Phylogenetic analysis of high quality proteins**

  
27

28  
29 296 To further validate the high-quality protein data set, GOPHER [54] v3.4.2 was used to predict  
30  
31 297 orthologues for each protein. QFO (04/18) [52] eukaryotic reference proteomes were supplemented  
32  
33 298 with Uniprot Reference proteomes for *Lithobates catesbeiana* (UP000228934) [14] and *Xenopus laevis*  
34  
35 299 (UP000186698) [17] and the annotated protein sequences of *Nanorana parkeri* v2 [15]. GOPHER  
36  
37 300 orthologues were predicted with default settings based on a modified mutual best hit algorithm that  
38  
39 301 accounts for one-to-many or many-to-many orthologous relationships and retains the closest orthologue  
40  
41 302 from each species. The closest orthologues were aligned with MAFFT [55] v7.310 (default settings)  
42  
43 303 and phylogenetic trees inferred with IQ-TREE [56] v1.6.1 (default settings) for alignments containing  
44  
45 304 at least three sequences. Phylogenetic trees were inferred in this manner for 6,417 of the 6,580 high  
46  
47 305 quality proteins. A supertree was then constructed from the 6,417 individual protein trees using CLANN  
48  
49 306 [57] v4.2.2 (DFIT Most Similar Supertree Algorithm) (Figure 8, Figure S1). Branch consistency was  
50  
51 307 calculated for each branch as the proportion of source trees with taxa either side of the branch that have  
52  
53 308 no conflicts in terms of the placement of those taxa. The supertree supports the known phylogeny for  
54  
55 309 amphibians used in this study, giving additional confidence in the quality and utility of these protein  
56  
57 310 annotations. All alignments and trees are available in supplementary data via the *GigaScience* database.  
58  
59  
60  
61  
62  
63  
64  
65

311

1  
2  
3  
4  
5  
6  
7  
8  
9  
10  
11  
12  
13  
14  
15  
16  
17  
18  
19  
20  
21  
22  
23  
24  
25  
26  
27  
28  
29  
30  
31  
32  
33  
34  
35  
36  
37  
38  
39  
40  
41  
42  
43  
44  
45  
46  
47  
48  
49  
50  
51  
52  
53  
54  
55  
56  
57  
58  
59  
60  
61  
62  
63  
64  
65

## 312 Repeat identification and analysis

313 The cane toad genome has proven very difficult to assemble using short reads alone, which suggests a  
314 high frequency of repetitive sequences, as for other amphibians [12, 13]. RepeatMasker annotations  
315 from the MAKER pipeline support this interpretation, with over 4.1 million repeat sequences detected,  
316 accounting for 63.9% of the assembly (Table 5). **The mean repeat length is 406 bp, which exceeds the  
317 Illumina read length used in our study (mean 140.6 bp paired-end). This makes short-read assembly of  
318 these regions difficult, as reflected by the poor ABySS contiguity (contig N50 = 583 bp, Table 2), and  
319 emphasises the need for long read data in this organism.** The most abundant class of repeat elements  
320 are of unknown type (1.61 million elements covering 32.28% of the assembly), with DNA transposons  
321 the most abundant known class of element (817,262 repeats; 19.17% coverage). Of these, the most  
322 abundant are of the hAT-Ac (231,332 copies) and TcMar-Tc1 (226,145 copies) superfamilies (Table  
323 S4). Accounting for overlaps between repeat and gene features, 18.7% of the assembly (479,397,014  
324 bp) has no annotation (Figure 9).

## 325 Conclusion

326 This draft genome assembly will be an invaluable tool for advancing knowledge of anuran biology,  
327 genetics and the evolution of invasive species. Furthermore, we envisage these data will facilitate the  
328 development of biocontrol strategies that reduce the impact of cane toads on native fauna.

## 329 Availability of supporting data

330 Raw genomic sequencing data (Illumina and PacBio) and assembled scaffolds have been deposited in  
331 the ENA with the study accession PRJEB24695 and assembly accession GCA\_900303285. The genome  
332 assembly and annotation are also available in the *GigaScience* database, **and via a WebApollo [53]  
333 genome browser and an associated search tool (<http://www.slimsuite.unsw.edu.au/servers/apollo.php>).**

334 **List of abbreviations**

1  
2  
3 335 **AED: annotation edit distance**; BUSCO: Benchmarking Universal Single-Copy Orthologs; **BLAST:**  
4  
5 336 **Basic Local Alignment Search Tool**, qPCR: quantitative polymerase chain reaction, **HMM: hidden**  
6  
7 337 **Markov model**, CDS: coding sequence; bp: base pair; gDNA: genomic DNA; **ORF: open reading frame**;  
8  
9 338 **QFO: Quest For Orthologues**; SMRT: single-molecule real time; SINE: short interspersed nuclear  
10  
11 339 element; LINE: long interspersed nuclear element, LTR: long terminal repeat; **TE: transposable**  
12  
13  
14 340 **elements**; **TPM: transcripts per million**; UTR: untranslated region, **s.f.: significant figure**

16  
17 341 **Additional files**

18  
19  
20 342 **Figure S1. Phylogenetic supertree constructed from phylogenetic trees for 6,417 high confidence cane**  
21  
22 343 **toad proteins.**

23  
24  
25 344 Table S1. Primers used for genome size estimation by single copy gene qPCR.

26  
27 345 **Table S2. Individual and combined full BUSCO gene ratings for cane toad assemblies, annotation,**  
28  
29  
30 346 **transcriptome.**

31  
32 347 **Table S3. Sequence statistics, top BLAST hits, and classification for MAKER2 annotations.**

33  
34  
35 348 Table S4. RepeatMasker statistics broken down by repeat category.

36  
37  
38  
39 349 **Ethics approval and consent to participate**

40  
41 350 All experimentation was performed under the approval of the University of Sydney Animal Ethics  
42  
43  
44 351 Committee.

45  
46  
47 352 **Consent for publication**

48  
49  
50 353 Not applicable

51  
52  
53 354 **Competing interests**

54  
55  
56 355 The authors declare that they have no competing interests.



## 356 **Funding**

1  
2  
3 357 This work was supported by the Cane Toad Genome Consortium and Bioplatforms Australia. Funding  
4  
5 358 was provided by the Australian Research Council (DP160102991). L.A.R. is funded by ARC DECRA  
6  
7 359 Fellowship (DE150101393). R.S. is funded by ARC Australian Laureate Fellowship (FL120100074).  
8  
9 360 E.C.H. is funded by ARC Australian Laureate Fellowship (FL170100022). M.R.W. and the Ramaciotti  
10  
11 361 Centre for Genomics acknowledge infrastructure funding from the Australian Research Council  
12  
13 362 (LE150100031), the Australian Government NCRIS scheme administered by Bioplatforms Australia  
14  
15 363 and the New South Wales Government RAAP scheme. M.V. is supported by a CNPq fellowship  
16  
17 364 (302892/2016-8). M.C. is supported by a FCT investigator grant (IF/00283/2014/CP1256/CT0012).  
18  
19  
20 365 F.S. is supported by FEDER (COMPETE, POCI-01-0145-FEDER-006821) and FCT  
21  
22 366 (UID/BIA/50027/2013) funds. D.E.T. was supported through an Australian Government Research  
23  
24 367 Training Program (RTP) scholarship.

## 28 368 **Author's contributions**

29  
30  
31 369 P.A.W coordinated the project. P.A.W, R.S, E.C.H, L.A.R, R.J.E, M.W. designed the study. P.A.W,  
32  
33 370 R.S, E.C.H, L.A.R, R.J.E and F.S funded the project. R.S provided the cane toad samples. D.E.T  
34  
35 371 performed the genomic DNA extraction, PCR experiments and data analysis. T.L.R performed the  
36  
37 372 sequencing. R.J.E and T.G.A performed the genome assemblies and primary data analysis. D.O and  
38  
39 373 T.G.A. performed the genome annotation. R.J.E, D.E.T, T.G.A and P.A.W and wrote the manuscript.  
40  
41 374 All authors edited and approved the final manuscript.  
42  
43  
44

## 45 375 **Acknowledgements**

46  
47  
48 376 We thank the Ramaciotti Centre for Genomics, UNSW and the Kinghorn Centre for Clinical Genomics  
49  
50 377 at the Garvan Institute of Medical Research who performed the sequencing in this study. This project  
51  
52 378 was undertaken with the assistance of resources and services from the National Computational  
53  
54 379 Infrastructure (NCI), which is supported by the Australian Government. This project used  
55  
56 380 computational resources from Intersect, which were in part supported by the Australian Research  
57  
58 381 Council. The authors acknowledge UNSW Science's high performance computing cluster (Katana), the  
59  
60

UNSW School of Biotechnology and Biomolecular Sciences high memory node, the Sydney Informatics Hub and the University of Sydney's high performance computing cluster (Artemis) providing the high performance computing resources that have contributed to the research results reported within this paper. We thank the members of the UNSW Science Faculty Computing unit, particularly Duncan Smith, for all his help getting software installed and running on the katana computer cluster. We thank Dr Andrew Kelly for early discussions on cane toad genome size and technical assistance with gDNA extractions.

## References

1. Shine R. The ecological impact of invasive cane toads (*Bufo marinus*) in Australia. *The Quarterly Review of Biology*. 2010;85 3:253-91.
2. Phillips BL, Brown GP, Greenlees M, Webb JK and Shine R. Rapid expansion of the cane toad (*Bufo marinus*) invasion front in tropical Australia. *Austral Ecology*. 2007;32 2:169-76.
3. Phillips BL, Brown GP and Shine R. Assessing the potential impact of cane toads on Australian snakes. *Conservation Biology*. 2003;17 6:1738-47.
4. Smith JG and Phillips BL. Toxic tucker: the potential impact of cane toads on Australian reptiles. *Pacific Conservation Biology*. 2006;12 1:40-9.
5. Urban MC, Phillips BL, Skelly DK and Shine R. The cane toad's (*Chaunus* [*Bufo*] *marinus*) increasing ability to invade Australia is revealed by a dynamically updated range model. *Proceedings of the Royal Society of London B: Biological Sciences*. 2007;274 1616:1413-9.
6. Slade R and Moritz C. Phylogeography of *Bufo marinus* from its natural and introduced ranges. *Proceedings of the Royal Society of London B: Biological Sciences*. 1998;265 1398:769-77.
7. Sequeira F, Sodr e D, Ferrand N, Bernardi JA, Sampaio I, Schneider H, et al. Hybridization and massive mtDNA unidirectional introgression between the closely related Neotropical toads *Rhinella marina* and *R. schneideri* inferred from mtDNA and nuclear markers. *BMC evolutionary biology*. 2011;11 1:264.
8. Rollins LA, Richardson MF and Shine R. A genetic perspective on rapid evolution in cane toads (*Rhinella marina*). *Molecular Ecology*. 2015;24 9:2264-76.
9. Estoup A, Baird SJ, Ray N, Currat M, CORNUET J, Santos F, et al. Combining genetic, historical and geographical data to reconstruct the dynamics of bioinvasions: application to the cane toad *Bufo marinus*. *Molecular ecology resources*. 2010;10 5:886-901.
10. Trumbo DR, Epstein B, Hohenlohe PA, Alford RA, Schwarzkopf L and Storfer A. Mixed population genomics support for the central marginal hypothesis across the invasive range of the cane toad (*Rhinella marina*) in Australia. *Molecular ecology*. 2016;25 17:4161-76.
11. Leblois R, Rousset F, Tikel D, Moritz C and Estoup A. Absence of evidence for isolation by distance in an expanding cane toad (*Bufo marinus*) population: an individual-based analysis of microsatellite genotypes. *Molecular Ecology*. 2000;9 11:1905-9.
12. Bozzoni I and Beccari E. Clustered and interspersed repetitive DNA sequences in four amphibian species with different genome size. *Biochimica et Biophysica Acta (BBA)-Nucleic Acids and Protein Synthesis*. 1978;520 2:245-52.
13. Olmo E. Genome variations in the transition from amphibians to reptiles. *Journal of molecular evolution*. 1991;33 1:68-75.
14. Hammond SA, Warren RL, Vandervalk BP, Kucuk E, Khan H, Gibb EA, et al. The North American bullfrog draft genome provides insight into hormonal regulation of long noncoding RNA. *Nature Communications*. 2017;8 1:1433.

- 426 15. Sun Y-B, Xiong Z-J, Xiang X-Y, Liu S-P, Zhou W-W, Tu X-L, et al. Whole-genome sequence  
1 427 of the Tibetan frog *Nanorana parkeri* and the comparative evolution of tetrapod genomes.  
2 428 Proceedings of the National Academy of Sciences. 2015;112 11:E1257-E62.
- 3 429 16. Hellsten U, Harland RM, Gilchrist MJ, Hendrix D, Jurka J, Kapitonov V, et al. The genome of  
4 430 the Western clawed frog *Xenopus tropicalis*. Science. 2010;328 5978:633-6.
- 5 431 17. Session AM, Uno Y, Kwon T, Chapman JA, Toyoda A, Takahashi S, et al. Genome evolution  
6 432 in the allotetraploid frog *Xenopus laevis*. Nature. 2016;538 7625:336.
- 7 433 18. Richardson MF, Sequeira F, Selechnik D, Carneiro M, Vallinoto M, Reid JG, et al. Improving  
8 434 amphibian genomic resources: a multi-tissue reference transcriptome of an iconic invader.  
9 435 GigaScience. 2017;7 1:1-7.
- 10 436 19. Andrews S. FastQC: a quality control tool for high throughput sequence data. 2010.
- 11 437 20. Bolger AM, Lohse M and Usadel B. Trimmomatic: a flexible trimmer for Illumina sequence  
12 438 data. Bioinformatics. 2014;30 15:2114-20.
- 13 439 21. Simpson JT, Wong K, Jackman SD, Schein JE, Jones SJ and Birol I. ABySS: a parallel  
14 440 assembler for short read sequence data. Genome research. 2009;19 6:1117-23.
- 15 441 22. Ye C, Hill CM, Wu S, Ruan J and Ma ZS. DBG2OLC: efficient assembly of large genomes  
16 442 using long erroneous reads of the third generation sequencing technologies. Scientific reports.  
17 443 2016;6:31900.
- 18 444 23. Langmead B and Salzberg SL. Fast gapped-read alignment with Bowtie 2. Nature methods.  
19 445 2012;9 4:357-9.
- 20 446 24. Li H, Handsaker B, Wysoker A, Fennell T, Ruan J, Homer N, et al. The sequence  
21 447 alignment/map format and SAMtools. Bioinformatics. 2009;25 16:2078-9.
- 22 448 25. Walker BJ, Abeel T, Shea T, Priest M, Abouelliel A, Sakthikumar S, et al. Pilon: an integrated  
23 449 tool for comprehensive microbial variant detection and genome assembly improvement. PloS  
24 450 one. 2014;9 11:e112963.
- 25 451 26. Vinogradov AE. Genome size and GC-percent in vertebrates as determined by flow cytometry:  
26 452 The triangular relationship. Cytometry Part A. 1998;31 2:100-9.
- 27 453 27. Simão FA, Waterhouse RM, Ioannidis P, Kriventseva EV and Zdobnov EM. BUSCO:  
28 454 assessing genome assembly and annotation completeness with single-copy orthologs.  
29 455 Bioinformatics. 2015;31 19:3210-2.
- 30 456 28. Camacho C, Coulouris G, Avagyan V, Ma N, Papadopoulos J, Bealer K, et al. BLAST+:  
31 457 architecture and applications. BMC bioinformatics. 2009;10 1:421.
- 32 458 29. Mistry J, Finn RD, Eddy SR, Bateman A and Punta M. Challenges in homology search:  
33 459 HMMER3 and convergent evolution of coiled-coil regions. Nucleic acids research. 2013;41  
34 460 12:e121-e.
- 35 461 30. Keller O, Kollmar M, Stanke M and Waack S. A novel hybrid gene prediction method  
36 462 employing protein multiple sequence alignments. Bioinformatics. 2011;27 6:757-63.
- 37 463 31. Rice P, Longden I and Bleasby A. EMBOSS: the European molecular biology open software  
38 464 suite. Elsevier Current Trends, 2000.
- 39 465 32. Bachmann K. Specific nuclear DNA amounts in toads of the genus *Bufo*. Chromosoma.  
40 466 1970;29 3:365-74.
- 41 467 33. Camper J, Ruedas L, Bickham J and Dixon J. The relationship of genome size with  
42 468 developmental rates and reproductive strategies in five families of neotropical bufonoid frogs.  
43 469 Life Sci Adv. 1993;12:79-87.
- 44 470 34. Bachmann K. Nuclear DNA and developmental rate in frogs. Quarterly Journal of the Florida  
45 471 Academy of Sciences. 1972;35 4:225-31.
- 46 472 35. Chipman AD, Khaner O, Haas A and Tchernov E. The evolution of genome size: what can be  
47 473 learned from anuran development? Journal of Experimental Zoology Part A: Ecological  
48 474 Genetics and Physiology. 2001;291 4:365-74.
- 49 475 36. Griffin C, Scott D and Papworth D. The influence of DNA content and nuclear volume on the  
50 476 frequency of radiation-induced chromosome aberrations in *Bufo* species. Chromosoma.  
51 477 1970;30 2:228-49.
- 52 478 37. Goin OB, Goin CJ and Bachmann K. DNA and amphibian life history. Copeia. 1968:532-40.

- 479 38. MacCulloch RD, Upton DE and Murphy RW. Trends in nuclear DNA content among  
1 480 amphibians and reptiles. *Comparative Biochemistry and Physiology Part B: Biochemistry and*  
2 481 *Molecular Biology*. 1996;113 3:601-5.
- 3 482 39. Marçais G and Kingsford C. A fast, lock-free approach for efficient parallel counting of  
4 483 occurrences of k-mers. *Bioinformatics*. 2011;27 6:764-70.
- 5 484 40. Vurture GW, Sedlazeck FJ, Nattestad M, Underwood CJ, Fang H, Gurtowski J, et al.  
6 485 GenomeScope: fast reference-free genome profiling from short reads. *Bioinformatics*. 2017;33  
7 486 14:2202-4.
- 8 487 41. Wilhelm J, Pingoud A and Hahn M. Real-time PCR-based method for the estimation of genome  
9 488 sizes. *Nucleic Acids Research*. 2003;31 10:e56-e.
- 10 489 42. Holt C and Yandell M. MAKER2: an annotation pipeline and genome-database management  
11 490 tool for second-generation genome projects. *BMC bioinformatics*. 2011;12 1:491.
- 12 491 43. Slater GSC and Birney E. Automated generation of heuristics for biological sequence  
13 492 comparison. *BMC bioinformatics*. 2005;6 1:31.
- 14 493 44. Smit AFA, Hubley R and Green P. 2013–2015. RepeatMasker Open-4.0. 2013.  
15 494 <http://www.repeatmasker.org/>.
- 16 495 45. Hubley R, Finn RD, Clements J, Eddy SR, Jones TA, Bao W, et al. The Dfam database of  
17 496 repetitive DNA families. *Nucleic acids research*. 2015;44 D1:D81-D9.
- 18 497 46. Smit AFA and Hubley R. 2008–2015. RepeatModeler Open-1.0. 2008.  
19 498 <http://www.repeatmasker.org/>.
- 20 499 47. Korf I. Gene finding in novel genomes. *BMC bioinformatics*. 2004;5 1:59.
- 21 500 48. Apweiler R, Bairoch A, Wu CH, Barker WC, Boeckmann B, Ferro S, et al. UniProt: the  
22 501 Universal Protein knowledgebase. *Nucleic Acids Research*. 2004;32 suppl\_1:D115-D9.  
23 502 doi:10.1093/nar/gkh131.
- 24 503 49. Richardson MF, Sequeira F, Selechnik D, Carneiro M, Vallinoto M, Reid JG, et al. Supporting  
25 504 data for “Improving amphibian genomic resources: a multitissue reference transcriptome of an  
26 505 iconic invader.” *Giga-Science Database* 2017. <http://dx.doi.org/10.5524/100374>.
- 27 506 50. Davey NE, Shields DC and Edwards RJ. SLiMDisc: short, linear motif discovery, correcting  
28 507 for common evolutionary descent. *Nucleic acids research*. 2006;34 12:3546-54.
- 29 508 51. Patro R, Duggal G, Love MI, Irizarry RA and Kingsford C. Salmon provides fast and bias-  
30 509 aware quantification of transcript expression. *Nature methods*. 2017;14 4:417.
- 31 510 52. Altenhoff AM, Boeckmann B, Capella-Gutierrez S, Dalquen DA, DeLuca T, Forslund K, et al.  
32 511 Standardized benchmarking in the quest for orthologs. *Nature methods*. 2016;13 5:425.
- 33 512 53. Lee E, Helt GA, Reese JT, Munoz-Torres MC, Childers CP, Buels RM, et al. Web Apollo: a  
34 513 web-based genomic annotation editing platform. *Genome biology*. 2013;14 8:R93.
- 35 514 54. Davey NE, Edwards RJ and Shields DC. The SLiMDisc server: short, linear motif discovery in  
36 515 proteins. *Nucleic acids research*. 2007;35 suppl\_2:W455-W9.
- 37 516 55. Katoh K and Standley DM. MAFFT multiple sequence alignment software version 7:  
38 517 improvements in performance and usability. *Molecular biology and evolution*. 2013;30 4:772-  
39 518 80.
- 40 519 56. Nguyen L-T, Schmidt HA, von Haeseler A and Minh BQ. IQ-TREE: a fast and effective  
41 520 stochastic algorithm for estimating maximum-likelihood phylogenies. *Molecular biology and*  
42 521 *evolution*. 2014;32 1:268-74.
- 43 522 57. Creevey C and McInerney JO. Clann: investigating phylogenetic information through supertree  
44 523 analyses. *Bioinformatics*. 2004;21 3:390-2.
- 45 524 58. Rambaut A. FigTree v1.4. *Molecular evolution, phylogenetics and epidemiology* Edinburgh,  
46 525 UK: University of Edinburgh, Institute of Evolutionary Biology. 2012.

529

530

## 531 Tables

532 **Table 1.** Summary statistics of generated whole genome shotgun sequencing data. Bold rows indicate  
 533 data used for assembly.

| Platform                         | Library Type | Mean insert size (kb) | Mean read length (bp) | Number of reads      | Number of bases (Gb) |
|----------------------------------|--------------|-----------------------|-----------------------|----------------------|----------------------|
| HiSeqX (raw)                     | Paired-end   | 0.35                  | 147.7                 | 1,857,762,090        | 282.92               |
| <b>HiSeqX (filtered)</b>         |              |                       | <b>140.6</b>          | <b>1,205,616,705</b> | <b>169.47</b>        |
| PacBio RS II                     | SMRTbell     | 15-50                 | 8,852                 | 2,794,391            | 24.736               |
| PacBio RS II                     | SMRTbell     | 15-50                 | 9,085                 | 595,447              | 5.409                |
| PacBio RS II                     | SMRTbell     | 15-50                 | 10,432                | 1,867,543            | 19.482               |
| PacBio RS II                     | SMRTbell     | 20-50                 | 10,834                | 2,487,852            | 26.952               |
| <b>PacBio Total</b>              |              |                       | <b>9,887</b>          | <b>7,745,233</b>     | <b>76.58</b>         |
| <b>PacBio Unique<sup>1</sup></b> |              |                       | <b>10,987</b>         | <b>6,167,714</b>     | <b>67.77</b>         |

534 1. Longest read per sequenced molecule (SMRT ZMW).

535

536

537

538

539

540

541

542

543

544

**Table 2.** Summary of genome assemblies. For comparison, statistics are provided for two existing neobatrachian genomes, *Nanorana parkeri* (v2) [15] and *Lithobates catesbeianus* (v2.1)[14], and two anuran reference genomes, *Xenopus tropicalis* (v9.1) [16] and *Xenopus laevis* (v9.2) [17]. Lengths are given to 3 s.f. All percentages are given to 1 d.p.

| Genome Assembly          | Hybrid (v2.2) | Short read | Long read | <i>N. parkeri</i> (v2.0) | <i>L. catesbeianus</i> (v2.1) | <i>X. tropicalis</i> (v9.1) | <i>X. laevis</i> (v9.2) |
|--------------------------|---------------|------------|-----------|--------------------------|-------------------------------|-----------------------------|-------------------------|
| Total Length (Gb)        | 2.55          | 3.75       | 2.69      | 2.07                     | 6.25                          | 1.44                        | 2.72                    |
| No. scaffolds            | 31,392        | 19.9 M*    | 31,392*   | 135,808                  | 1.54 M                        | 6,822                       | 108,033                 |
| Proportion gap (%N)      | 0.0%          | 0.1%       | 0.0%      | 3.9%                     | 11.6%                         | 4.9%                        | 11.4%                   |
| N50                      | 168 kb        | 583 bp     | 167 kb    | 1.06 Mb                  | 39.4 kb                       | 135 Mb                      | 137 Mb                  |
| L50                      | 3,373         | 715 k      | 3,531     | 555                      | 31,248                        | 5                           | 9                       |
| Longest scaffold         | 3.53 Mb       | 72.6 kb    | 3.64 Mb   | 8.61 Mb                  | 1.38 Mb                       | 195 Mb                      | 220 Mb                  |
| GC                       | 43.2%         | 43.3%      | 42.9%     | 42.6%                    | 43.1%                         | 40.1%                       | 39.0%                   |
| <b>BUSCO<sup>1</sup></b> |               |            |           |                          |                               |                             |                         |
| Complete Single copy     | 80.9%         | 15.5%      | 2.2%      | 83.4%                    | 42.3%                         | 87.5%                       | 52.9%                   |
| Complete Duplicate       | 2.2%          | 0.7%       | 0.0%      | 1.6%                     | 0.9%                          | 1.0%                        | 39.8%                   |
| Fragment                 | 7.5%          | 33.6%      | 2.2%      | 7.2%                     | 22.3%                         | 6.0%                        | 3.2%                    |

1. BUSCO v2.0.1 short summary statistics (n=3950).

\* Statistics for short and long read assemblies refer to contigs used for hybrid assembly.

551

552 **Table 3.** GenomeScope genome size estimates for *Rhinella marina* based on raw trimmed Illumina data  
 553 using different combinations of k and maximum k-mer coverage. Lengths are in megabases (0 d.p.).

| Data       | Max<br>kmer<br>coverage | Unique Length<br>(Mb) |       | Repeat Length<br>(Mb) |     | Genome Size (Mb) |       |
|------------|-------------------------|-----------------------|-------|-----------------------|-----|------------------|-------|
|            |                         | Min                   | Max   | Min                   | Max | Min              | Max   |
| Raw (k=21) | 1000                    | 1,365                 | 1,366 | 489                   | 489 | 1,853            | 1,855 |
| Raw (k=21) | 10000                   | 1,365                 | 1,365 | 874                   | 874 | 2,239            | 2,240 |
| Raw (k=23) | 1000                    | 1,453                 | 1,455 | 470                   | 471 | 1,924            | 1,926 |
| Raw (k=23) | 10000                   | 1,454                 | 1,454 | 842                   | 842 | 2,296            | 2,296 |
| Q30 (k=21) | 1000                    | 1,307                 | 1,308 | 462                   | 462 | 1,768            | 1,771 |
| Q30 (k=21) | 10000                   | 1,307                 | 1,308 | 749                   | 749 | 2,056            | 2,057 |
| Q30 (k=23) | 1000                    | 1,389                 | 1,391 | 438                   | 439 | 1,828            | 1,830 |
| Q30 (k=23) | 10000                   | 1,390                 | 1,391 | 713                   | 713 | 2,103            | 2,104 |

554

555

556

557

558

559

560

561

562

563

564 **Table 4.** Estimation of *Rhinella marina* genome size using various methods and the corresponding level  
 565 of sequencing coverage (3 s.f.). GenomeScope values in this table are mean values from the four setting  
 566 combinations.

| Method                | Estimated Genome Size (Gb) | Illumina coverage (X) | PacBio coverage (X) | Reference        |
|-----------------------|----------------------------|-----------------------|---------------------|------------------|
| Flow cytometry (mean) | 4.33                       | 65.3                  | 17.7                | [26, 33, 35, 38] |
| Flow cytometry (min)  | 3.98                       | 71.1                  | 19.2                | [38]             |
| Flow cytometry (max)  | 4.90                       | 57.7                  | 15.6                | [35]             |
| Densitometry (mean)   | 4.95                       | 57.1                  | 15.5                | [32, 34, 36, 37] |
| Densitometry (min)    | 4.06 <sup>#</sup>          | 69.7                  | 18.9                | [37]             |
| Densitometry (max)    | 5.65                       | 50.1                  | 13.6                | [32]             |
| GenomeScope (raw)     | 2.08                       | 136                   | 36.8                | -                |
| GenomeScope (Q30)     | 1.94                       | 146                   | 39.4                | -                |
| qPCR (zfp292)         | 2.38                       | 119                   | 32.1                | -                |
| Assembly (v2.2)       | 2.55                       | 111                   | 30.0                | -                |

567 # value adjusted to account for updated size of reference genome used to infer *R. marina* genome size.



576 **Table 5.** Summary statistics of consensus protein-coding gene predictions and predicted repeat  
 577 elements (including RNA genes) for the *Rhinella marina* v2.2 draft genome. Lengths are given to 3 s.f.  
 578 Coverage and mean depth statistics for PacBio and Q30-trimmed Illumina reads are given to 2 d.p.

| Element             | Count     | No. scaffolds | Avg. length | Total length | Genome coverage | PacBio depth (X) | Illumina depth (X) |
|---------------------|-----------|---------------|-------------|--------------|-----------------|------------------|--------------------|
| Protein-coding gene | 58,302    | 19,530        | 18.8 kb     | 1.10 Gb      | 42.91%          | 20.32            | 58.07              |
| Transcript          | 58,302    | 19,530        | 1.24 kb     | 72.3 Mb      | 2.83%           | 20.49            | 65.41              |
| - Similar to known  | 25,846    | 11,918        | 1.90 kb     | 49.1 Mb      | 1.92%           | 20.08            | 56.42              |
| - Unknown           | 32,456    | 15,213        | 714 bp      | 23.2 Mb      | 0.91%           | 20.98            | 68.82              |
| Exon                | 309,718   | 19,530        | 233 bp      | 72.3 Mb      | 2.83%           | 20.49            | 65.41              |
| - Coding            | 294,535   | 19,530        | 207 bp      | 60.8 Mb      | 2.38%           | 20.67            | 66.97              |
| Intron              | 251,416   | 18,509        | 4.08 kb     | 1.03 Gb      | 40.09%          | 20.30            | 57.55              |
| 5' UTR              | 15,855    | 8,839         | 208 bp      | 3.29 Mb      | 0.13%           | 18.69            | 53.86              |
| CDS                 | 58,302    | 19,530        | 1.04 kb     | 60.8 Mb      | 2.38%           | 20.67            | 66.97              |
| 3' UTR              | 11,965    | 5,780         | 682 bp      | 8.16 Mb      | 0.32%           | 19.91            | 58.52              |
| BUSCO SC Complete   | 3,194     | 2,014         | 32.6 kb     | 104 Mb       | 4.07%           | 19.89            | 53.01              |
| <b>Repeats</b>      |           |               |             |              |                 |                  |                    |
| SINE                | 21,620    | 9,322         | 338 bp      | 7.31 Mb      | 0.29%           | 19.45            | 58.23              |
| LINE                | 268,569   | 27,620        | 513 bp      | 138 Mb       | 5.38%           | 21.03            | 72.29              |
| LTR                 | 201,817   | 24,949        | 504 bp      | 102 Mb       | 3.98%           | 22.62            | 68.96              |
| DNA                 | 817,405   | 30,689        | 600 bp      | 490 Mb       | 19.17%          | 21.67            | 68.37              |
| Helitron            | 20,319    | 9,340         | 826 bp      | 16.8 Mb      | 0.66%           | 19.32            | 56.81              |
| Retroposon          | 1,042     | 829           | 549 bp      | 570 kb       | 0.02%           | 18.22            | 50.87              |
| Other               | 18        | 17            | 209 bp      | 3.7 kb       | 0.00%           | 14.27            | 24.60              |
| Unknown             | 1,610,883 | 30,966        | 513 bp      | 826 Mb       | 32.28%          | 20.12            | 59.39              |
| Satellite           | 25,557    | 10,270        | 440 bp      | 11.3 Mb      | 0.44%           | 18.38            | 54.21              |
| Simple repeats      | 968,947   | 30,620        | 56.9 bp     | 55.1 Mb      | 2.16%           | 18.88            | 48.51              |
| Low complexity      | 141,028   | 24,020        | 51.8 bp     | 7.30 Mb      | 0.29%           | 22.48            | 64.48              |
| rRNA                | 5,227     | 2,923         | 422 bp      | 2.20 Mb      | 0.09%           | 40.88            | 142.42             |
| tRNA                | 5,558     | 4,474         | 105 bp      | 583 kb       | 0.02%           | 29.15            | 140.06             |
| snRNA               | 21,788    | 9,432         | 546 bp      | 11.9 Mb      | 0.47%           | 24.63            | 89.12              |

|   |                          |           |        |         |         |       |       |        |
|---|--------------------------|-----------|--------|---------|---------|-------|-------|--------|
| 1 | srpRNA                   | 17        | 11     | 268 bp  | 4.55 kb | 0.00% | 22.11 | 140.44 |
| 2 | scRNA                    | 3         | 3      | 69.0 bp | 207 bp  | 0.00% | 15.53 | 47.29  |
| 3 | RNA                      | 418       | 266    | 482 bp  | 202 kb  | 0.01% | 32.65 | 173.99 |
| 4 |                          |           |        |         |         |       |       |        |
| 5 | <b>Repeat</b>            |           |        |         |         |       |       |        |
| 6 | <b>TOTAL<sup>1</sup></b> | 4,110,222 | 31,179 | 406 bp  | 1.63 Gb | 63.9% | 20.82 | 63.79  |

1. Values for repeat totals account for overlapping repeats.

7 579  
8  
9  
10  
11 580  
12  
13  
14 581  
15  
16  
17 582  
18  
19  
20 583  
21  
22  
23 584  
24  
25  
26 585  
27  
28  
29 586  
30  
31  
32 587  
33  
34  
35  
36 588  
37  
38  
39 589  
40  
41 590  
42  
43  
44 591  
45  
46 592  
47  
48 593  
49  
50  
51 594  
52  
53 595  
54  
55  
56 596  
57  
58 597  
59  
60  
61  
62  
63  
64  
65

598 **Table 6.** Proportions of predicted protein and transcript sequences exceeding 50%, 80%, 95% or 99%  
 599 coverage in the top BLAST+ hit from the published transcriptome [18], and combined coverage for the  
 600 top ten transcript hits. All percentages given to 3 s.f.

| Type                                | Count  | Coverage in top transcript hit |      |      |      | Coverage in top 10 transcript hits |      |      |      |
|-------------------------------------|--------|--------------------------------|------|------|------|------------------------------------|------|------|------|
|                                     |        | 50%+                           | 80%+ | 95%+ | 99%+ | 50%+                               | 80%+ | 95%+ | 99%+ |
| Protein<br>(similar to<br>known)    | 25,846 | 93.6                           | 76.7 | 56.5 | 40.7 | 97.5                               | 90.3 | 72.7 | 54.2 |
| Transcript<br>(similar to<br>known) | 25,846 | 75.0                           | 50.0 | 30.8 | 21.4 | 82.6                               | 73.1 | 57.2 | 40.9 |
| Protein<br>(unknown)                | 32,456 | 79.9                           | 49.8 | 27.1 | 15.8 | 85.7                               | 66.3 | 44.4 | 29.9 |
| Transcript<br>(unknown)             | 32,456 | 43.6                           | 21.5 | 12.1 | 8.61 | 52.6                               | 37.3 | 25.4 | 19.1 |

601

602

603

604

605

606

607

608

609

610

611

## 612 **Figure legends**

613 **Figure 1. *Rhinella marina*. An adult cane toad.**

614 **Figure 2. Schematic overview of project workflow.** A summary of the experimental methods used  
615 for sequencing, assembly, annotation and size estimation of the cane toad genome. Transcriptome data  
616 (orange segment) was obtained from our previous study [18].

617 **Figure 3. Assessment of genome assembly completeness.** BUSCO analysis of *Rhinella marina*  
618 genome assembly (v2.0 uncorrected, v2.1 pilon polishing, v2.2 pilon and arrow polishing, **combined**  
619 **v2.1, 2.2 and 2.2 ratings**), *Lithobates catesbeianus* (v2.1), *Nanorana parkeri* (v2.0), *Xenopus tropicalis*  
620 (v9.1) and *Xenopus leavis* (v9.2) genomes using the tetrapoda\_odb9 orthologue set (n=3950). The  
621 *Xenopus leavis* genome duplication is made clear by the large number of paralogs (light blue) with  
622 respect to other assemblies.

623 **Figure 4. GenomeScope k-mer frequency and log-transformed k-mer coverage profiles.** (A) raw  
624 Illumina data (k=23), (B) Q30 trimmed Illumina data (k=23). Profiles for k=21 are similar (data not  
625 shown).

626 **Figure 5. Key protein statistics for predicted genes with and without annotated similarity to**  
627 **known genes.** Histograms of (A) protein length, and (B) MAKER2 Annotation Edit Distance (AED),  
628 for “similar” (blue) and “unknown” (red) classes of predicted genes.

629 **Figure 6. Multi-tissue gene expression for predicted genes with and without annotated similarity**  
630 **to known genes.** (A) Histograms of RNA-Seq TPM for “similar” (blue) and “unknown” (red) classes  
631 of predicted genes, capped at 100 TPM. (B) “similar” and (C) “unknown” gene expression, rated as:  
632 Very low (<1 TPM), Low (1-9 TPM), Medium (10-99 TPM) or High (100+ TPM).

633 **Figure 7. Assessment of assembly annotation completeness.** BUSCO analysis for (A) all BUSCO  
634 tetrapoda genes (n=3950), and (B) the subset of BUSCO genes rated as “Missing” from the Richardson  
635 *et al.* transcriptome [18]. *R. marina* (combined): combined v2.0, v2.1 and v2.2 ratings; Annotation:

636 combined MAKER proteome and transcriptome ratings; GigaDB: combined assembly and annotation  
1 ratings; Cane Toad: combined assembly, annotation and Richardson *et al.* transcriptome [18].  
2  
3

638 **Figure 8. Phylogenetic supertree of 15 selected chordate taxa constructed from phylogenetic trees**  
4  
5  
6  
7  
8  
9  
10  
11  
12  
13  
14  
15  
16  
639 **for 6,417 high confidence cane toad proteins.** Branch labels indicate percentage consistency (see  
7  
8  
9  
10  
11  
12  
13  
14  
15  
16  
640 text), rounded down. Numbers following each taxon are the number and percentage of source trees  
17  
18  
19  
20  
21  
22  
23  
24  
25  
26  
641 containing that taxon. The tree has been rooted using fish as an outgroup and visualised with FigTree  
27  
28  
29  
30  
31  
32  
33  
34  
35  
36  
37  
38  
39  
40  
41  
42  
43  
44  
45  
46  
47  
48  
49  
50  
51  
52  
53  
54  
55  
56  
57  
58  
59  
60  
61  
62  
63  
64  
65  
642 [58]. The full supertree of 52 taxa is available as Figure S1.

643 **Figure 9. Summary of the main annotation classes for *Rhinella marina* genome assembly.**  
17  
18  
19  
20  
21  
22  
23  
24  
25  
26  
644 **Identified repeat classes exceeding 2% of assembly have been plotted separately (1 d.p.).** All other  
27  
28  
29  
30  
31  
32  
33  
34  
35  
36  
37  
38  
39  
40  
41  
42  
43  
44  
45  
46  
47  
48  
49  
50  
51  
52  
53  
54  
55  
56  
57  
58  
59  
60  
61  
62  
63  
64  
65  
645 repeats, including “Unknown”, have been grouped as “Other repeats”. The percentage for introns  
646 excludes any repeat sequences within those introns.

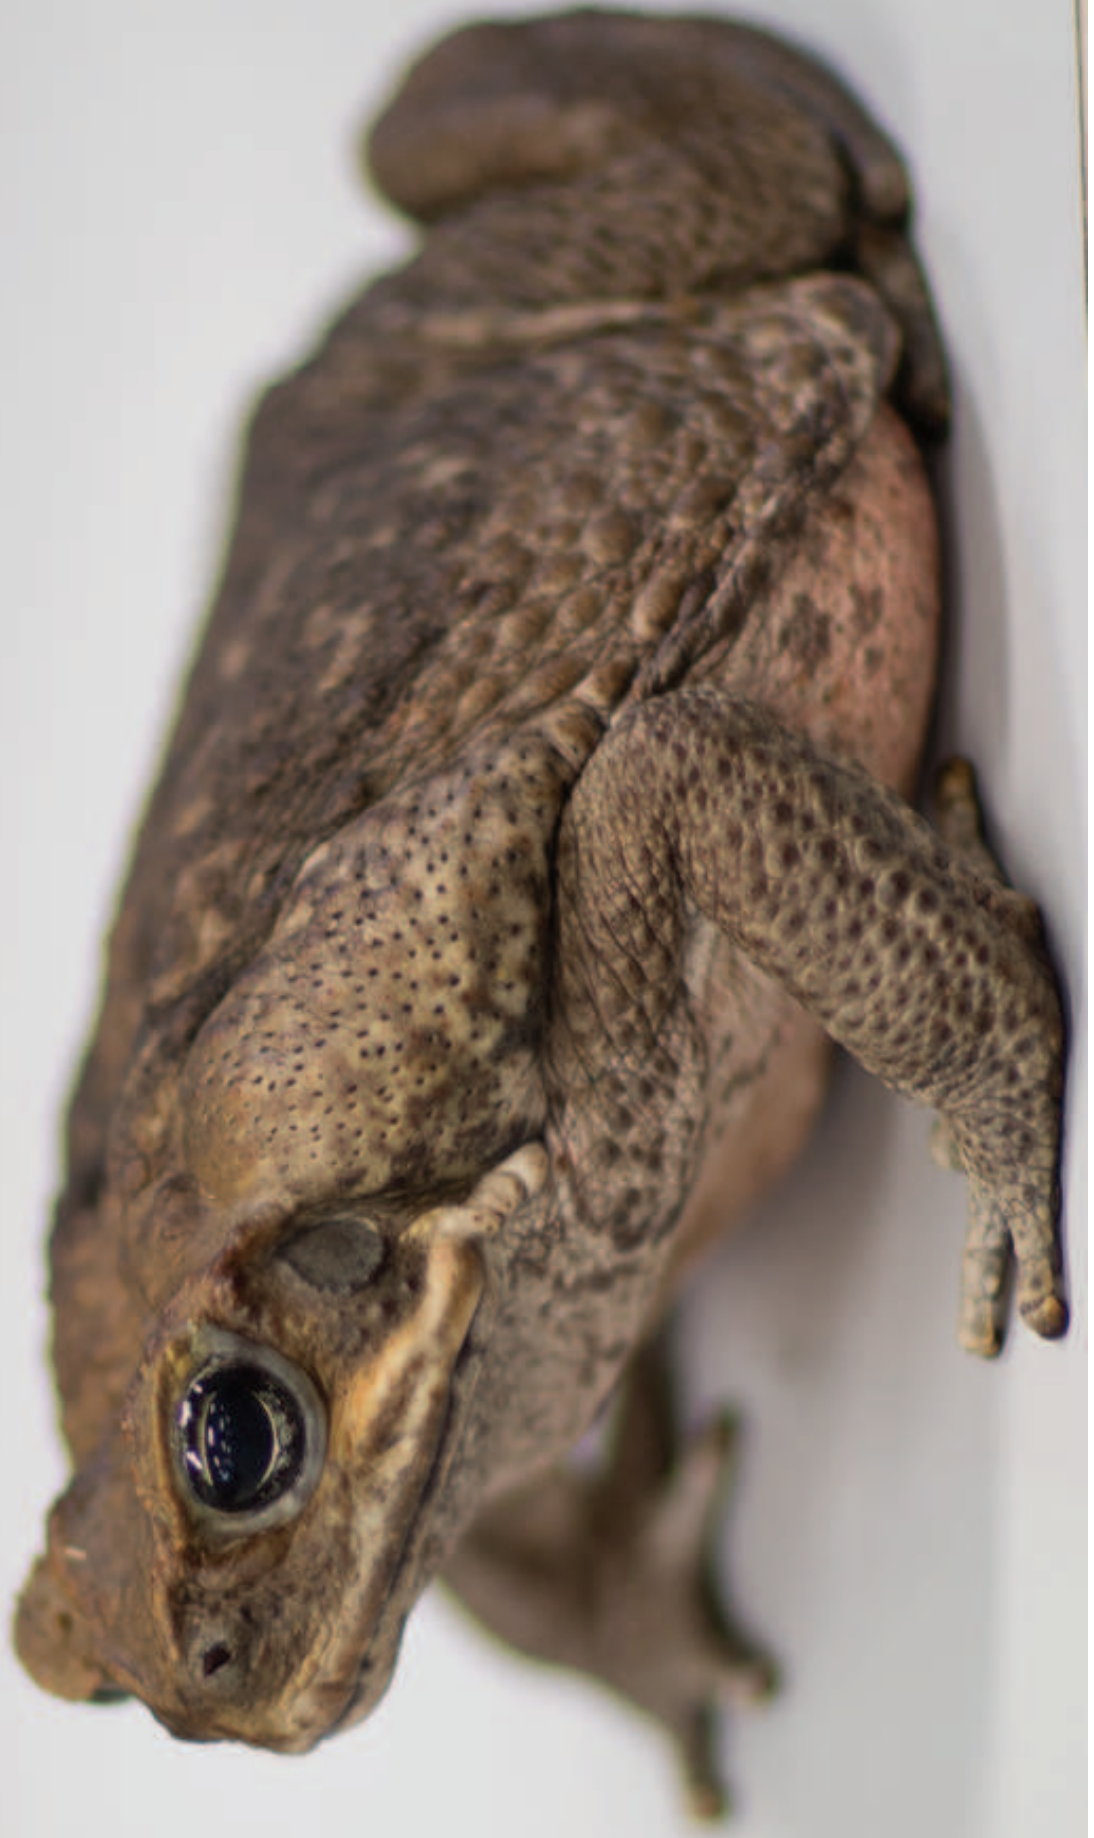

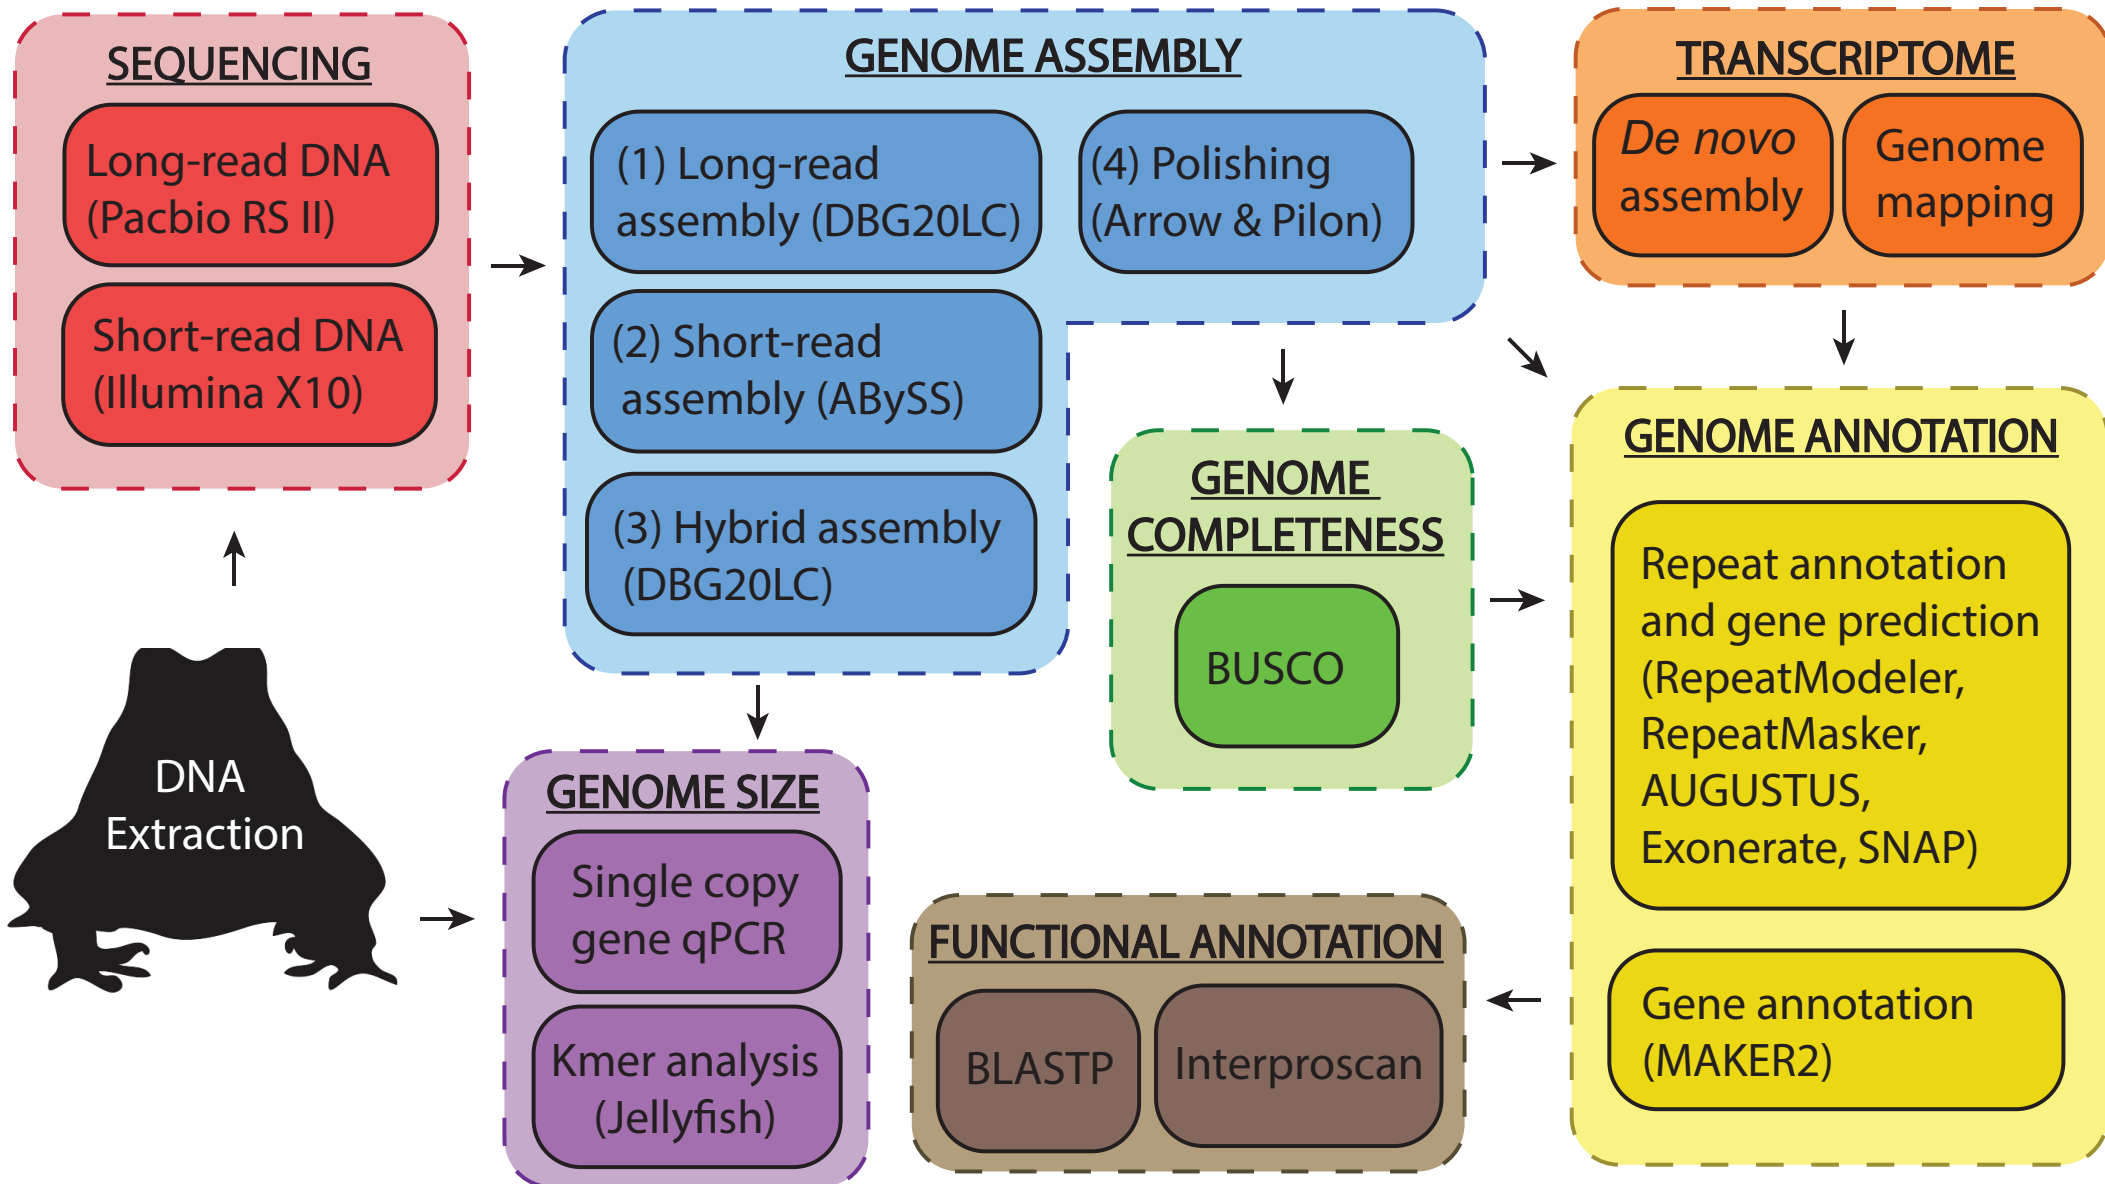

Figure 3

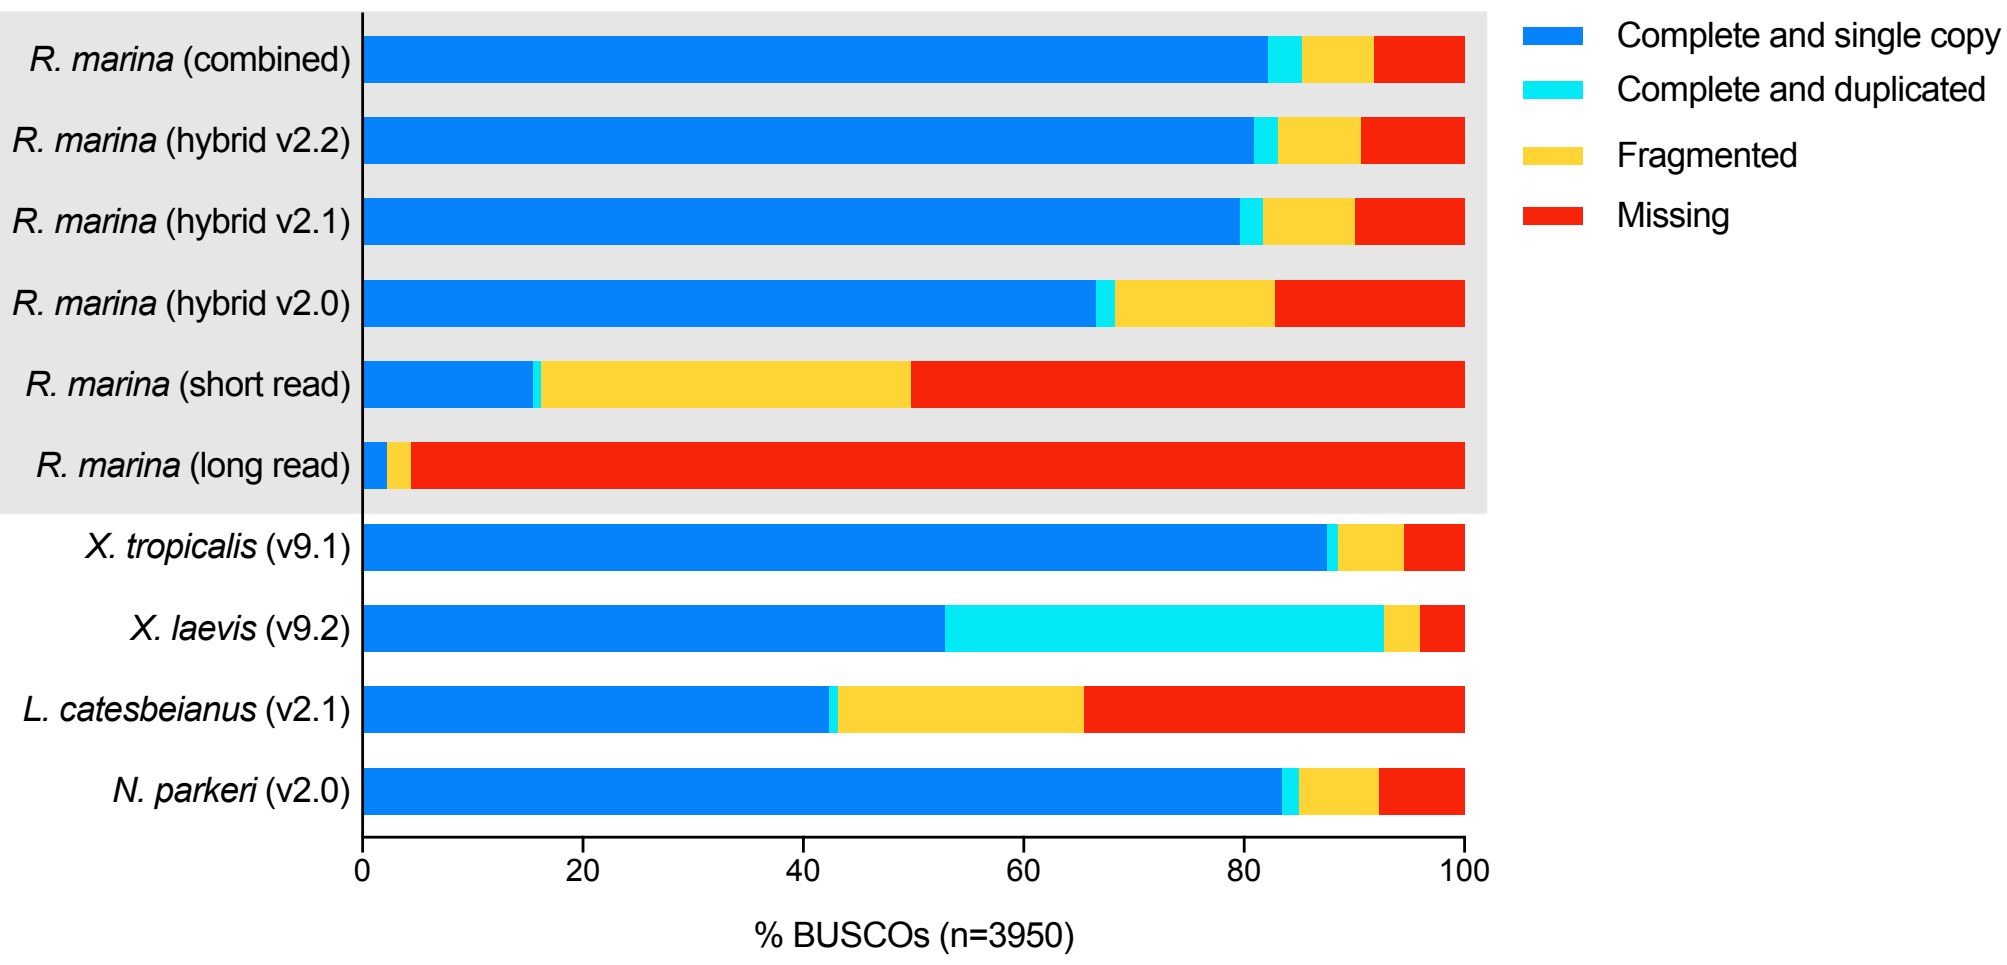



## A. Raw data (k=23)

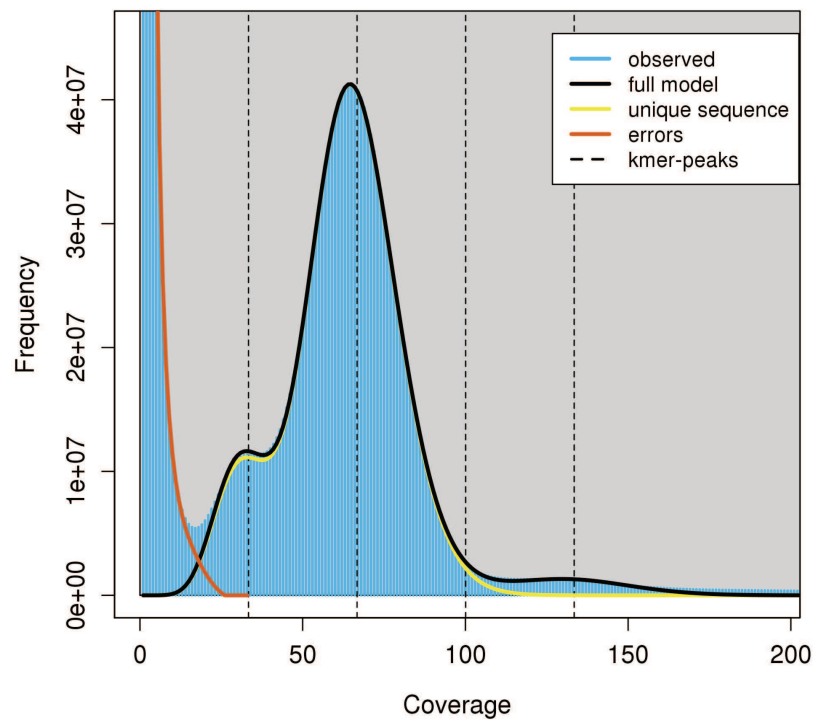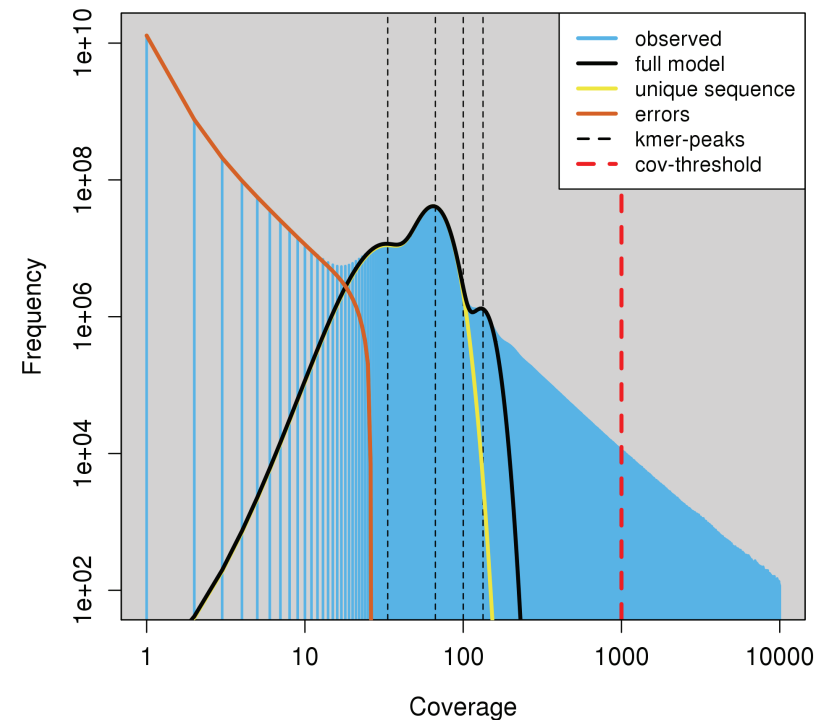

## B. Q30 trimmed data (k=23)

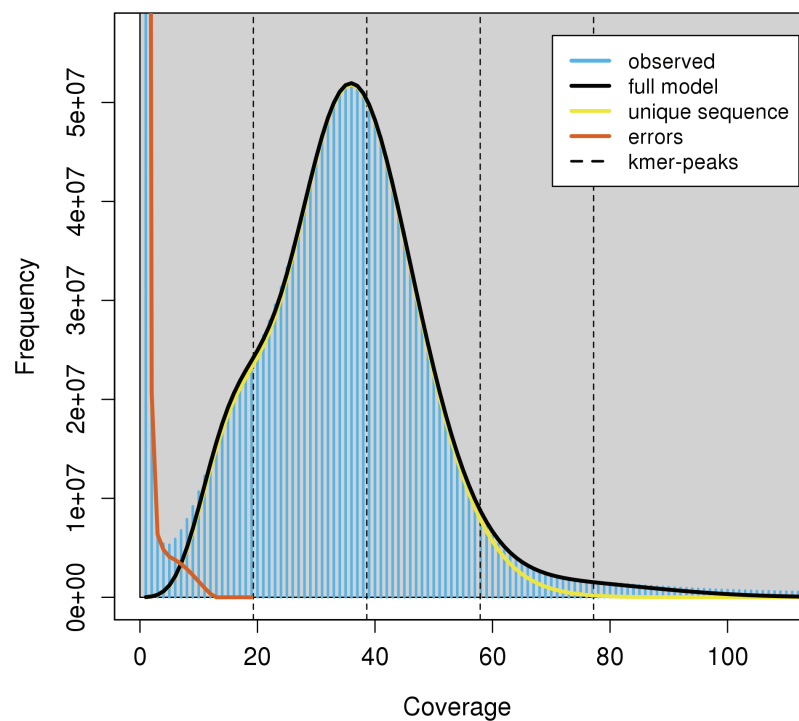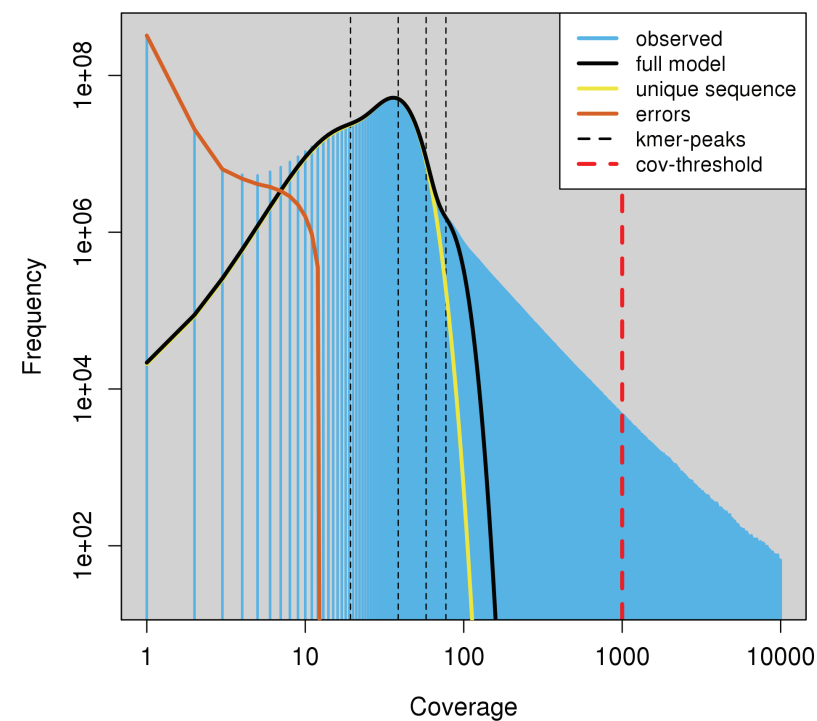

A.

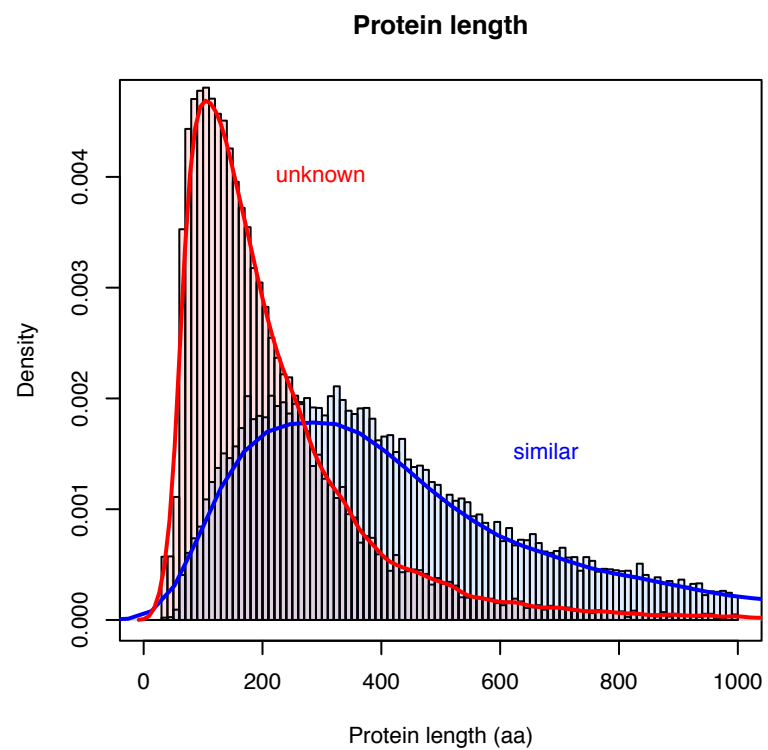

B.

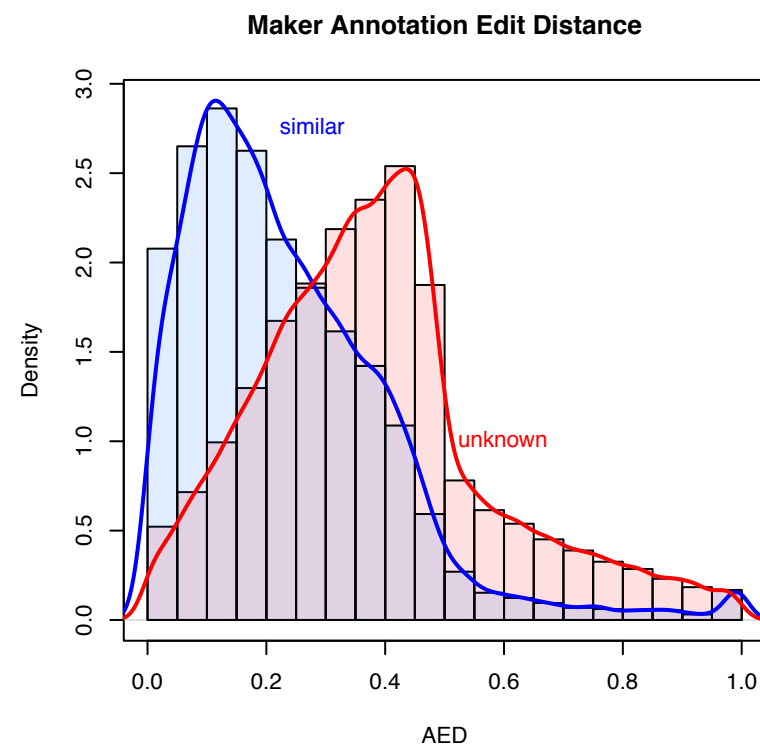

**A.**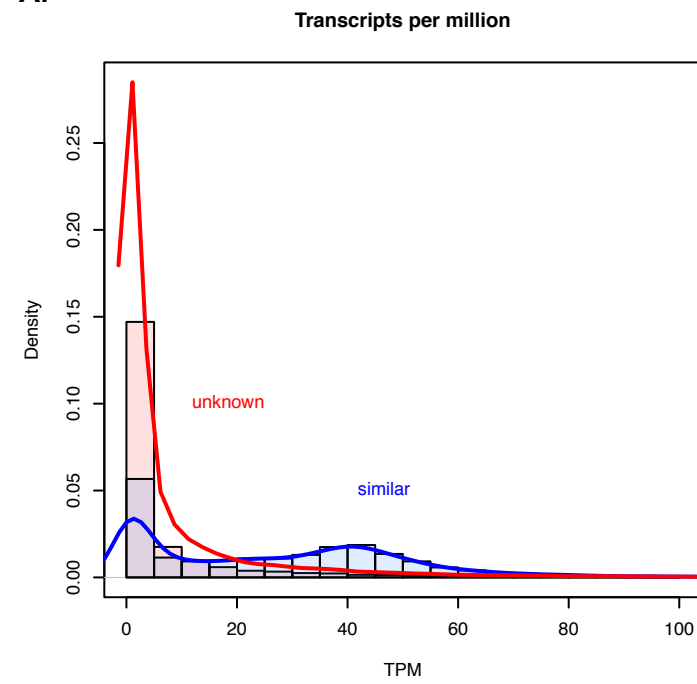**B.**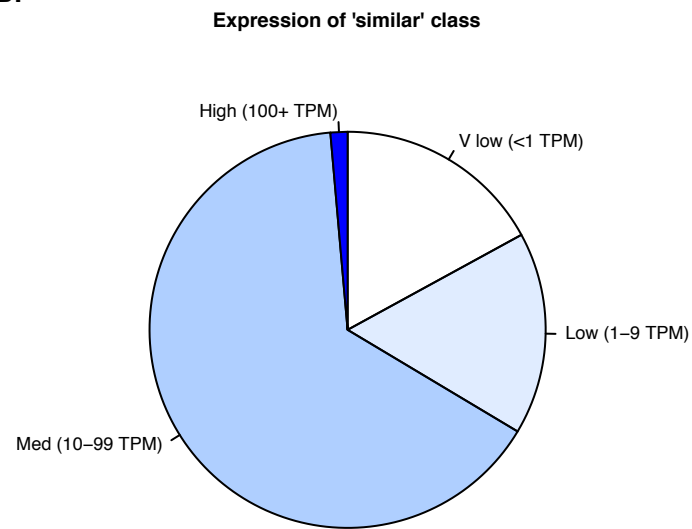**C.**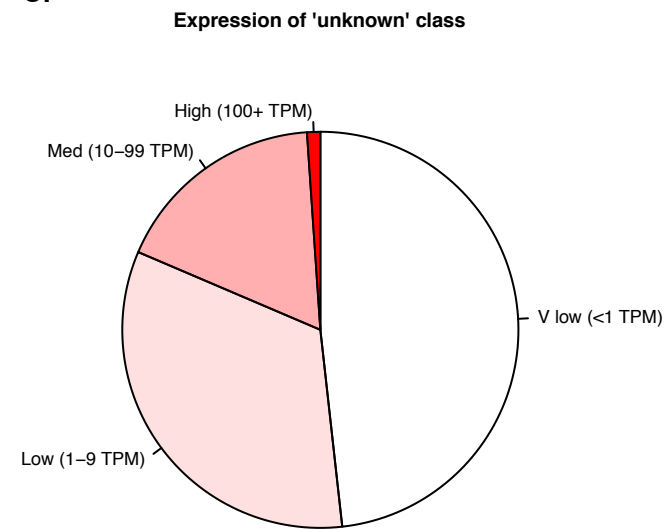

Figure 7

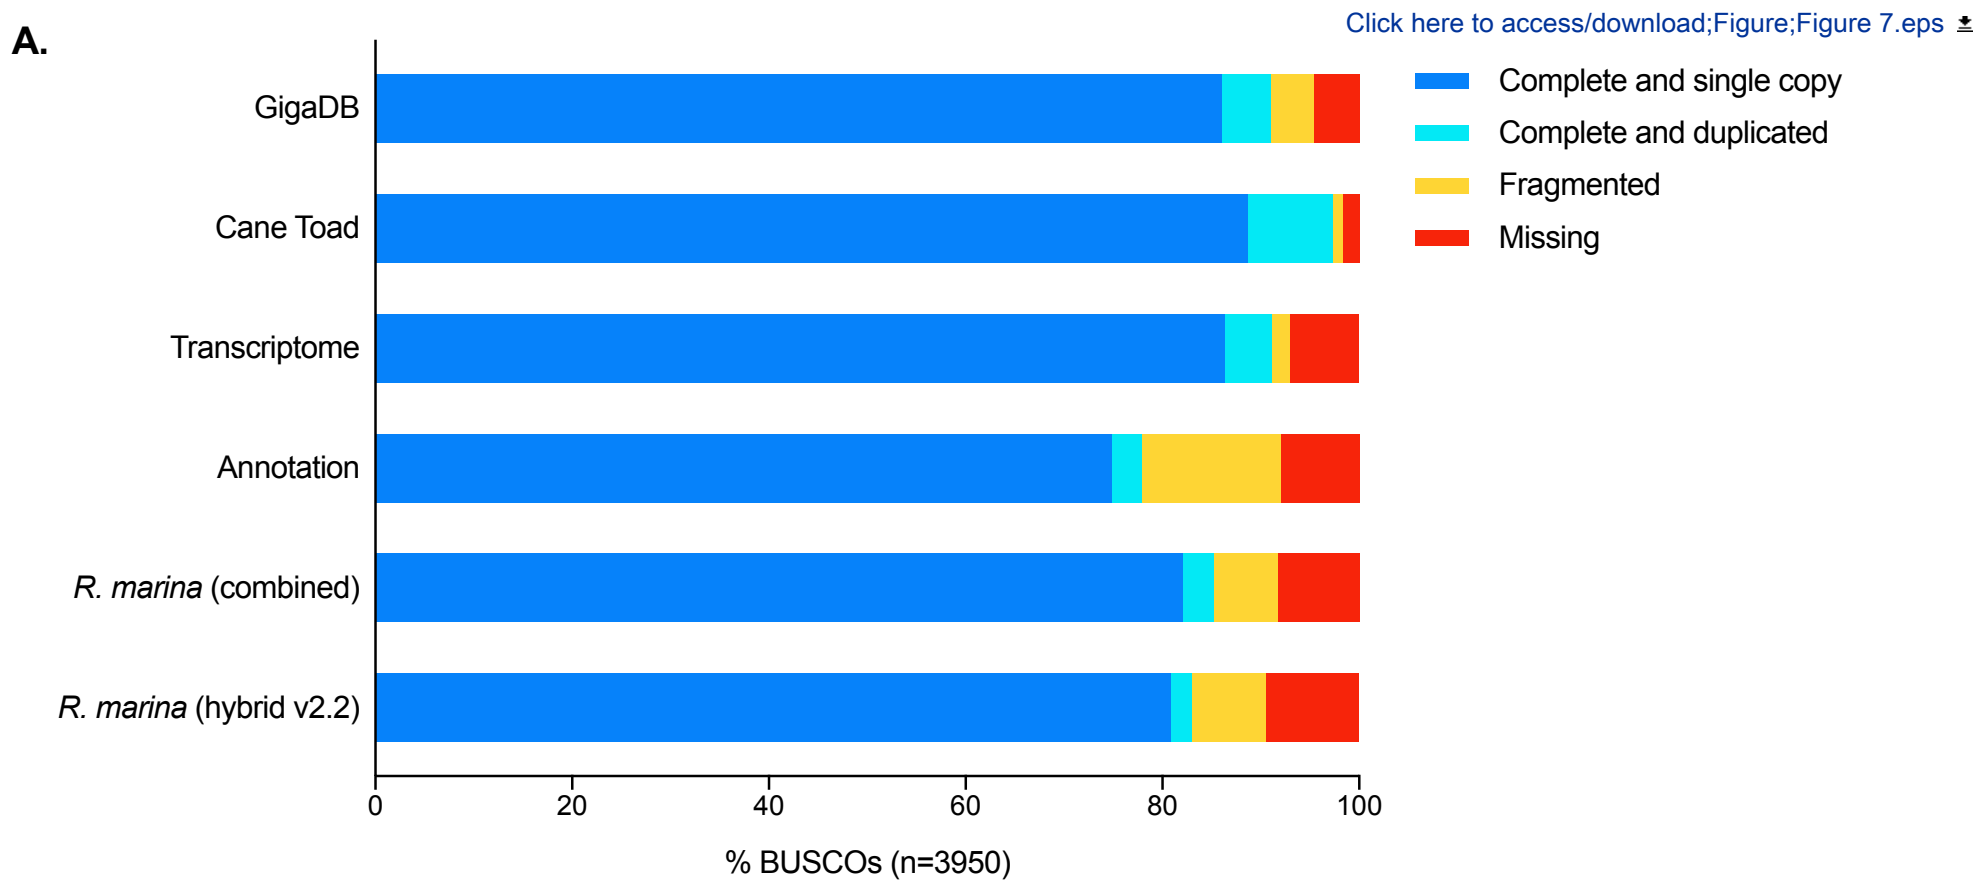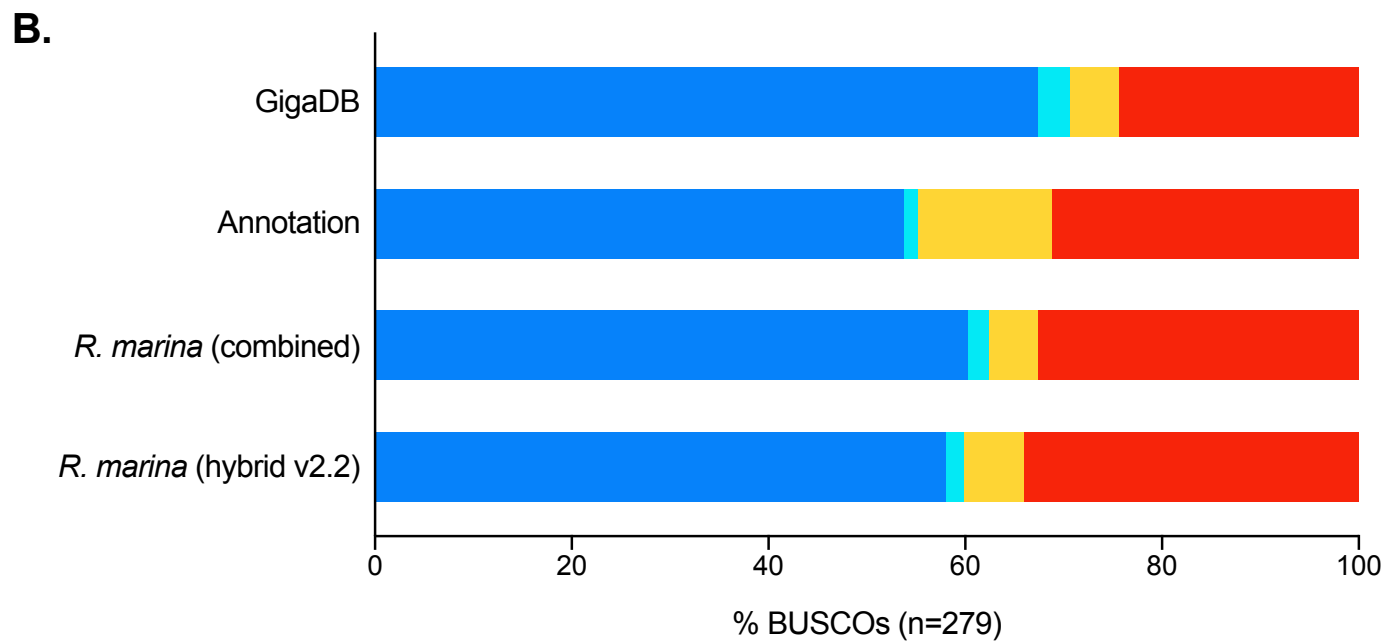

Figure 8

[Click here to access/download;Figure;Figure 8.pdf](#)

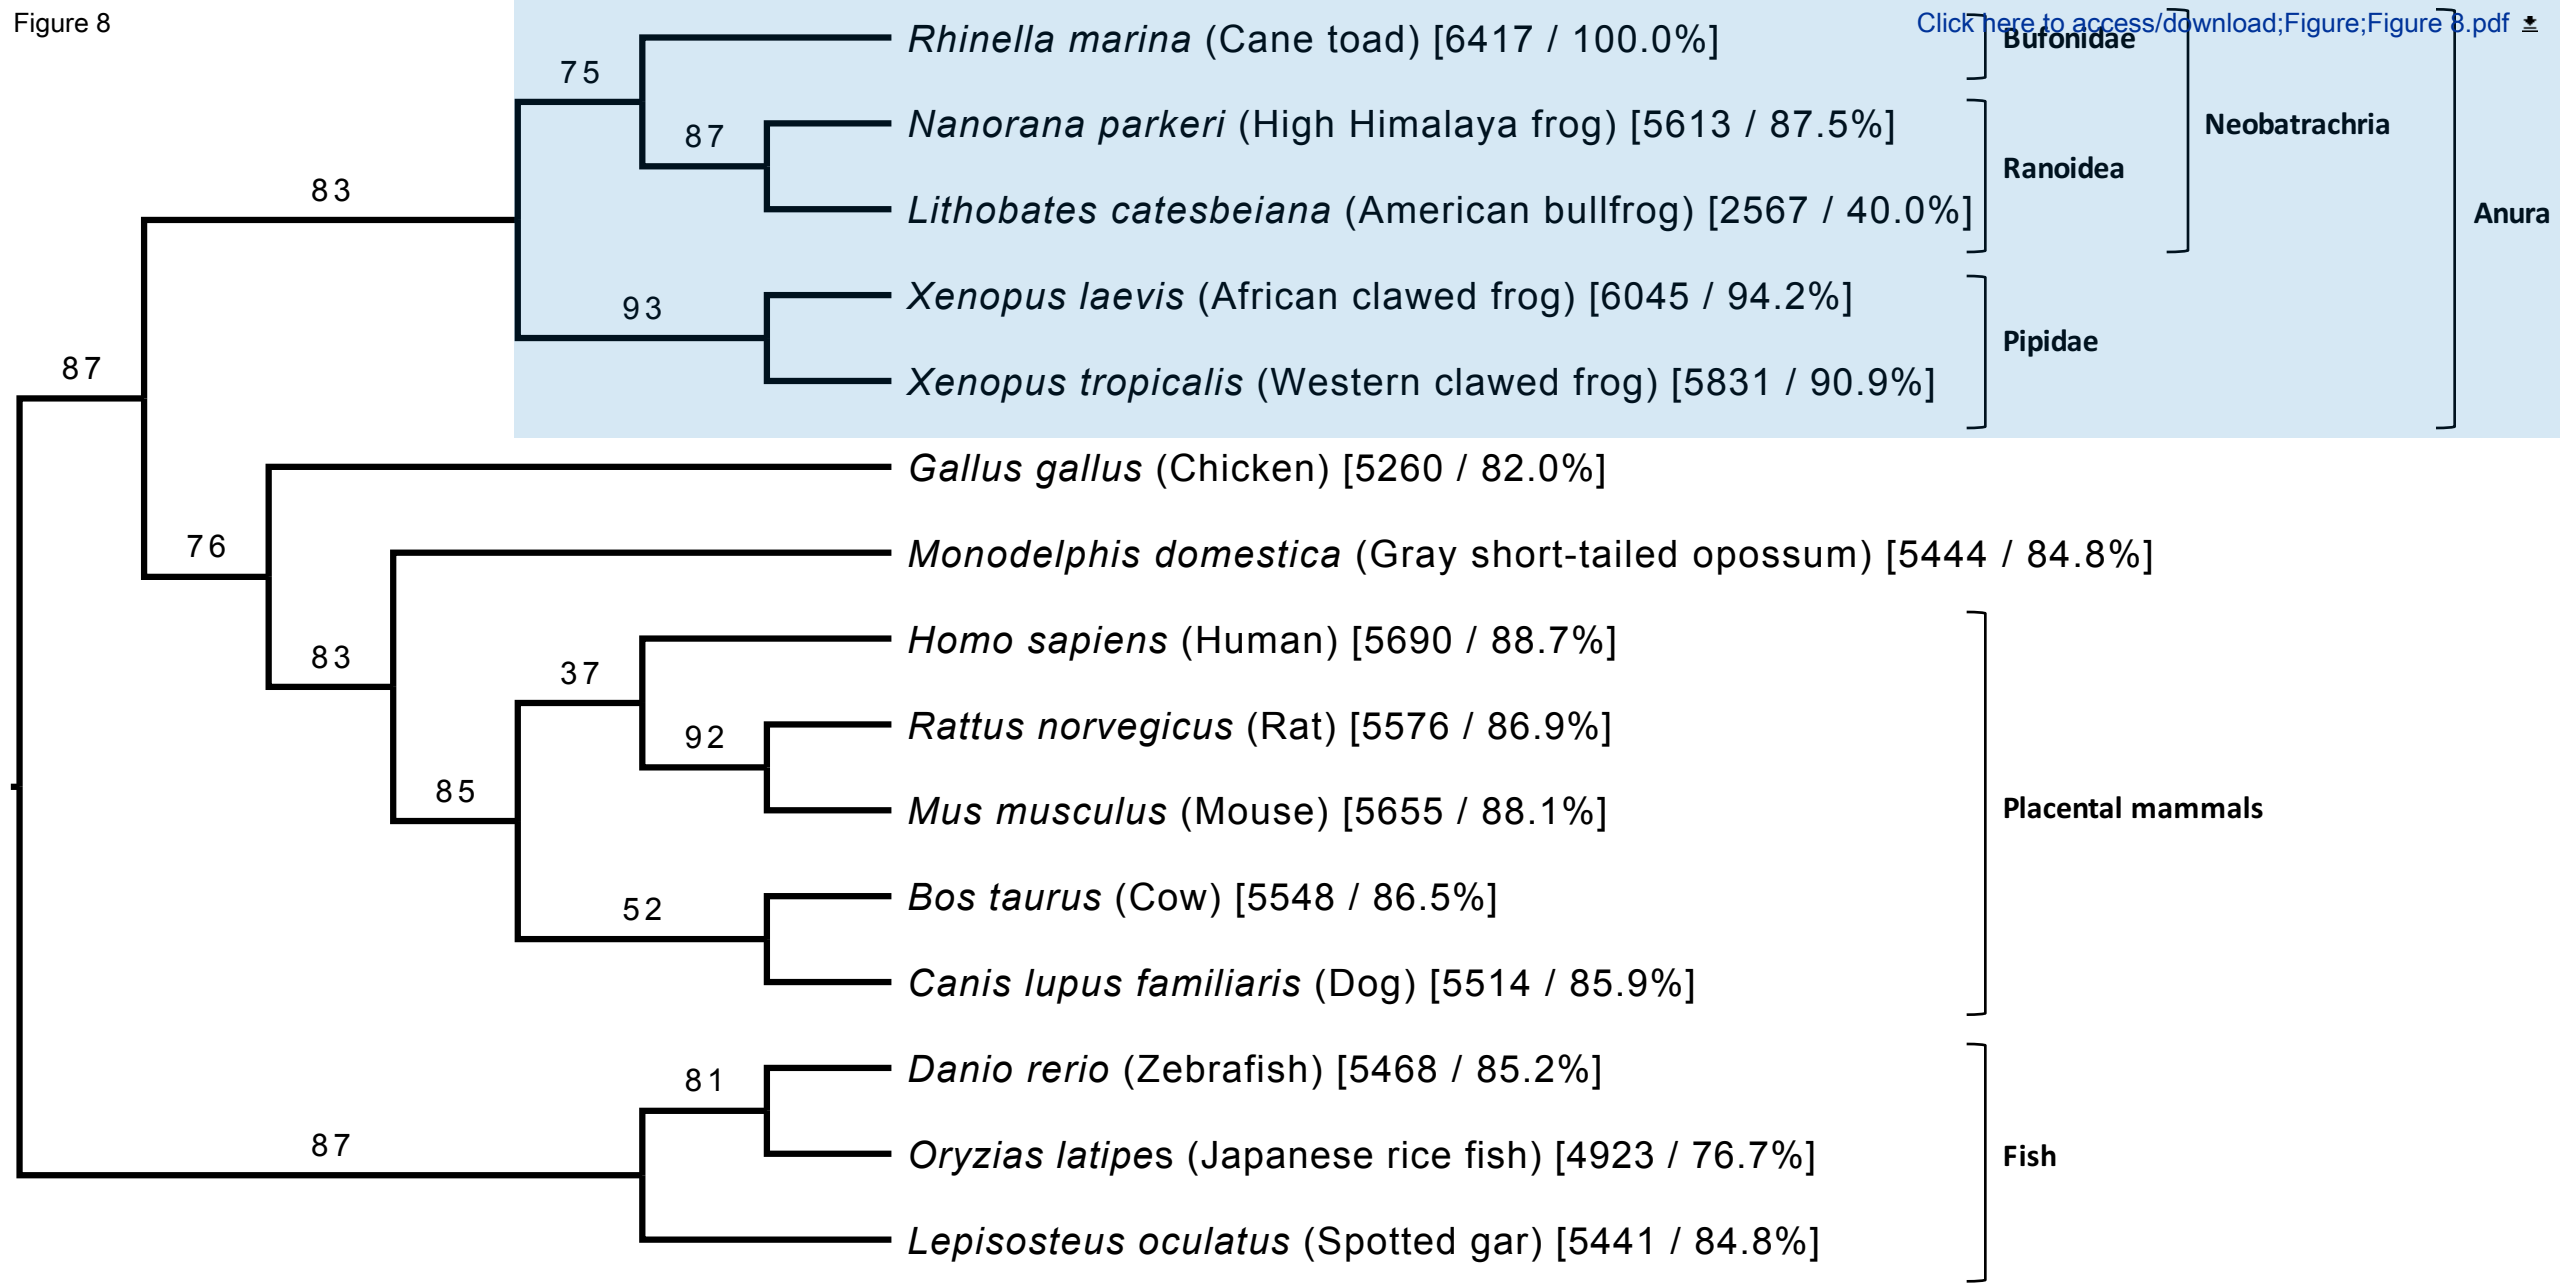

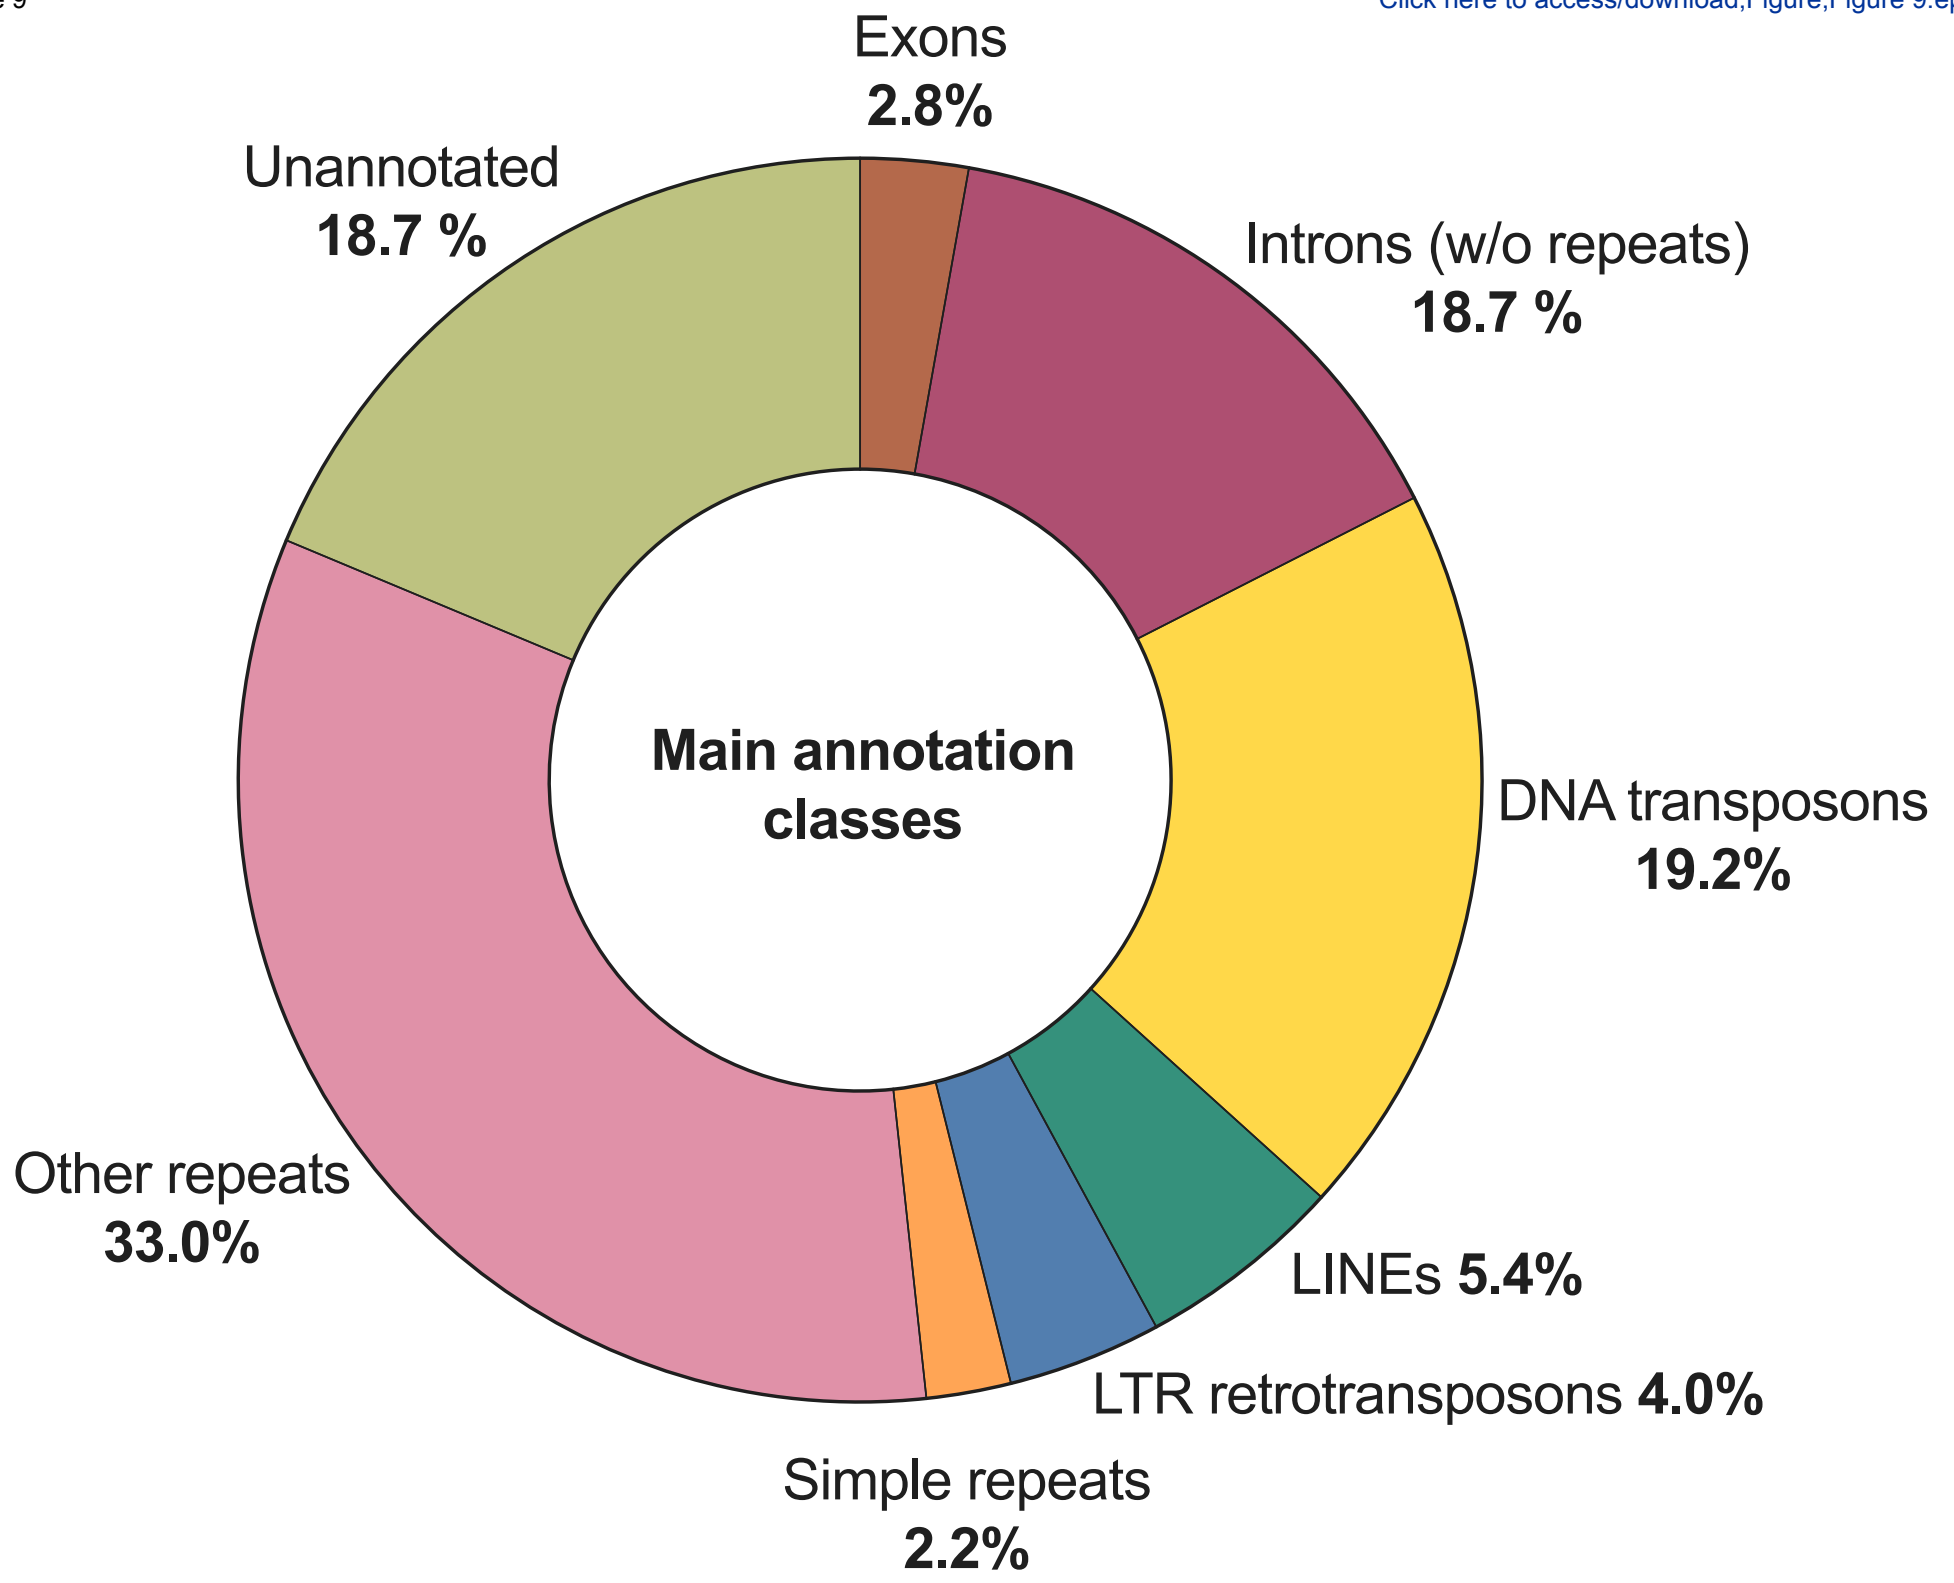



Click here to access/download  
**Supplementary Material**  
Figure S1.pdf



Click here to access/download  
**Supplementary Material**  
Table S1.xlsx





Click here to access/download  
**Supplementary Material**  
Table S2.xlsx

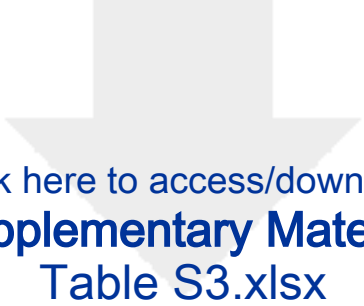

Click here to access/download  
**Supplementary Material**  
Table S3.xlsx



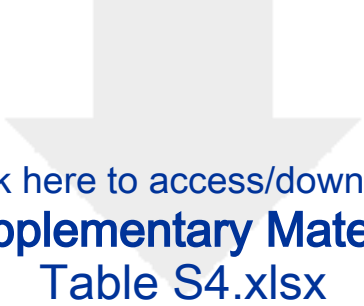

Click here to access/download  
**Supplementary Material**  
Table S4.xlsx



Supplement: giy095_giga-d-18-00104_revision_2.pdf [file giy095_giga-d-18-00104_revision_2.pdf]
