# Supplementary material for: Draft genome assembly of the invasive cane toad, Rhinella marina
Source: PubMed Central journal article supplement (PMC6145236; doi:10.1093/gigascience/giy095), 2018-08-07

# GigaScience

## Draft genome assembly of the invasive cane toad, *Rhinella marina*

--Manuscript Draft--

|                                                      |                                                                                                                                                                                                                                                                                                                                                                                                                                                                                                                                                                                                                                                                                                                                                                                                                                                                                                                                                                                                                                                                                                                                                                                                                                                                                                                                                                                                                                                                                                                                                                                                          |                                          |
|------------------------------------------------------|----------------------------------------------------------------------------------------------------------------------------------------------------------------------------------------------------------------------------------------------------------------------------------------------------------------------------------------------------------------------------------------------------------------------------------------------------------------------------------------------------------------------------------------------------------------------------------------------------------------------------------------------------------------------------------------------------------------------------------------------------------------------------------------------------------------------------------------------------------------------------------------------------------------------------------------------------------------------------------------------------------------------------------------------------------------------------------------------------------------------------------------------------------------------------------------------------------------------------------------------------------------------------------------------------------------------------------------------------------------------------------------------------------------------------------------------------------------------------------------------------------------------------------------------------------------------------------------------------------|------------------------------------------|
| <b>Manuscript Number:</b>                            | GIGA-D-18-00104R3                                                                                                                                                                                                                                                                                                                                                                                                                                                                                                                                                                                                                                                                                                                                                                                                                                                                                                                                                                                                                                                                                                                                                                                                                                                                                                                                                                                                                                                                                                                                                                                        |                                          |
| <b>Full Title:</b>                                   | Draft genome assembly of the invasive cane toad, <i>Rhinella marina</i>                                                                                                                                                                                                                                                                                                                                                                                                                                                                                                                                                                                                                                                                                                                                                                                                                                                                                                                                                                                                                                                                                                                                                                                                                                                                                                                                                                                                                                                                                                                                  |                                          |
| <b>Article Type:</b>                                 | Data Note                                                                                                                                                                                                                                                                                                                                                                                                                                                                                                                                                                                                                                                                                                                                                                                                                                                                                                                                                                                                                                                                                                                                                                                                                                                                                                                                                                                                                                                                                                                                                                                                |                                          |
| <b>Funding Information:</b>                          | Australian Research Council (DP160102991)                                                                                                                                                                                                                                                                                                                                                                                                                                                                                                                                                                                                                                                                                                                                                                                                                                                                                                                                                                                                                                                                                                                                                                                                                                                                                                                                                                                                                                                                                                                                                                | Dr. Lee A Rollins<br>Prof. Richard Shine |
|                                                      | Australian Research Council (DE150101393)                                                                                                                                                                                                                                                                                                                                                                                                                                                                                                                                                                                                                                                                                                                                                                                                                                                                                                                                                                                                                                                                                                                                                                                                                                                                                                                                                                                                                                                                                                                                                                | Dr. Lee A Rollins                        |
|                                                      | Australian Research Council (FL170100022)                                                                                                                                                                                                                                                                                                                                                                                                                                                                                                                                                                                                                                                                                                                                                                                                                                                                                                                                                                                                                                                                                                                                                                                                                                                                                                                                                                                                                                                                                                                                                                | Prof. Edward C Holmes                    |
|                                                      | Australian Research Council (LE150100031)                                                                                                                                                                                                                                                                                                                                                                                                                                                                                                                                                                                                                                                                                                                                                                                                                                                                                                                                                                                                                                                                                                                                                                                                                                                                                                                                                                                                                                                                                                                                                                | Prof. Marc R Wilkins                     |
|                                                      | Australian Research Council (FL120100074)                                                                                                                                                                                                                                                                                                                                                                                                                                                                                                                                                                                                                                                                                                                                                                                                                                                                                                                                                                                                                                                                                                                                                                                                                                                                                                                                                                                                                                                                                                                                                                | Prof. Richard Shine                      |
|                                                      | The National Council for Scientific and Technological Development (CNPq) (302892/2016-8)                                                                                                                                                                                                                                                                                                                                                                                                                                                                                                                                                                                                                                                                                                                                                                                                                                                                                                                                                                                                                                                                                                                                                                                                                                                                                                                                                                                                                                                                                                                 | Assoc. Prof. Marcelo Vallinoto           |
|                                                      | Bioplatforms Australia                                                                                                                                                                                                                                                                                                                                                                                                                                                                                                                                                                                                                                                                                                                                                                                                                                                                                                                                                                                                                                                                                                                                                                                                                                                                                                                                                                                                                                                                                                                                                                                   | Not applicable                           |
| <b>Abstract:</b>                                     | <p>Background: The cane toad (<i>Rhinella marina</i> formerly <i>Bufo marinus</i>) is a species native to Central and South America that has spread across many regions of the globe. Cane toads are known for their rapid adaptation and deleterious impacts on native fauna in invaded regions. However, despite an iconic status, there are major gaps in our understanding of cane toad genetics. The availability of a genome would help to close these gaps and accelerate cane toad research. Findings: We report a draft genome assembly for <i>R. marina</i>, the first of its kind for the Bufonidae family. We used a combination of long read PacBio RS II and short read Illumina HiSeq X sequencing to generate a total of 359.5 Gb of raw sequence data. The final hybrid assembly of 31,392 scaffolds was 2.55 Gb in length with a scaffold N50 of 168 kb. BUSCO analysis revealed that the assembly included full length or partial fragments of 90.6% of tetrapod universal single-copy orthologs (n=3950), illustrating that the gene-containing regions have been well-assembled. Annotation predicted 25,846 protein coding genes with similarity to known proteins in SwissProt. Repeat sequences were estimated to account for 63.9% of the assembly. Conclusion: The <i>R. marina</i> draft genome assembly will be an invaluable resource that can be used to further probe the biology of this invasive species. Future analysis of the genome will provide insights into cane toad evolution and enrich our understanding of their interplay with the ecosystem at large.</p> |                                          |
| <b>Corresponding Author:</b>                         | Peter White, Ph.D.<br>University of New South Wales<br>Sydney, NSW AUSTRALIA                                                                                                                                                                                                                                                                                                                                                                                                                                                                                                                                                                                                                                                                                                                                                                                                                                                                                                                                                                                                                                                                                                                                                                                                                                                                                                                                                                                                                                                                                                                             |                                          |
| <b>Corresponding Author Secondary Information:</b>   |                                                                                                                                                                                                                                                                                                                                                                                                                                                                                                                                                                                                                                                                                                                                                                                                                                                                                                                                                                                                                                                                                                                                                                                                                                                                                                                                                                                                                                                                                                                                                                                                          |                                          |
| <b>Corresponding Author's Institution:</b>           | University of New South Wales                                                                                                                                                                                                                                                                                                                                                                                                                                                                                                                                                                                                                                                                                                                                                                                                                                                                                                                                                                                                                                                                                                                                                                                                                                                                                                                                                                                                                                                                                                                                                                            |                                          |
| <b>Corresponding Author's Secondary Institution:</b> |                                                                                                                                                                                                                                                                                                                                                                                                                                                                                                                                                                                                                                                                                                                                                                                                                                                                                                                                                                                                                                                                                                                                                                                                                                                                                                                                                                                                                                                                                                                                                                                                          |                                          |
| <b>First Author:</b>                                 | Richard J Edwards                                                                                                                                                                                                                                                                                                                                                                                                                                                                                                                                                                                                                                                                                                                                                                                                                                                                                                                                                                                                                                                                                                                                                                                                                                                                                                                                                                                                                                                                                                                                                                                        |                                          |
| <b>First Author Secondary Information:</b>           |                                                                                                                                                                                                                                                                                                                                                                                                                                                                                                                                                                                                                                                                                                                                                                                                                                                                                                                                                                                                                                                                                                                                                                                                                                                                                                                                                                                                                                                                                                                                                                                                          |                                          |
| <b>Order of Authors:</b>                             | Richard J Edwards                                                                                                                                                                                                                                                                                                                                                                                                                                                                                                                                                                                                                                                                                                                                                                                                                                                                                                                                                                                                                                                                                                                                                                                                                                                                                                                                                                                                                                                                                                                                                                                        |                                          |
|                                                      | Daniel Enosi Tuipulotu                                                                                                                                                                                                                                                                                                                                                                                                                                                                                                                                                                                                                                                                                                                                                                                                                                                                                                                                                                                                                                                                                                                                                                                                                                                                                                                                                                                                                                                                                                                                                                                   |                                          |
|                                                      | Timothy G Amos                                                                                                                                                                                                                                                                                                                                                                                                                                                                                                                                                                                                                                                                                                                                                                                                                                                                                                                                                                                                                                                                                                                                                                                                                                                                                                                                                                                                                                                                                                                                                                                           |                                          |
|                                                      |                                                                                                                                                                                                                                                                                                                                                                                                                                                                                                                                                                                                                                                                                                                                                                                                                                                                                                                                                                                                                                                                                                                                                                                                                                                                                                                                                                                                                                                                                                                                                                                                          |                                          |

|                                                |                                                                                                                                                                                                                                                                                                                                                                                                                                                                                                                                                                                                                                                                                                                                                                                                                                                                                                                                                                                                                                                                                                                                                                                                                                                                                                                                                                                                                                                                                                                                                                                                                                                                                                                                                                                                                                                                                                                                                                                                                                                                                                                                                                                                                                                                                                                                                                                                                                                                                                                                                                                                                                                        |
|------------------------------------------------|--------------------------------------------------------------------------------------------------------------------------------------------------------------------------------------------------------------------------------------------------------------------------------------------------------------------------------------------------------------------------------------------------------------------------------------------------------------------------------------------------------------------------------------------------------------------------------------------------------------------------------------------------------------------------------------------------------------------------------------------------------------------------------------------------------------------------------------------------------------------------------------------------------------------------------------------------------------------------------------------------------------------------------------------------------------------------------------------------------------------------------------------------------------------------------------------------------------------------------------------------------------------------------------------------------------------------------------------------------------------------------------------------------------------------------------------------------------------------------------------------------------------------------------------------------------------------------------------------------------------------------------------------------------------------------------------------------------------------------------------------------------------------------------------------------------------------------------------------------------------------------------------------------------------------------------------------------------------------------------------------------------------------------------------------------------------------------------------------------------------------------------------------------------------------------------------------------------------------------------------------------------------------------------------------------------------------------------------------------------------------------------------------------------------------------------------------------------------------------------------------------------------------------------------------------------------------------------------------------------------------------------------------------|
|                                                | Denis O'Meally                                                                                                                                                                                                                                                                                                                                                                                                                                                                                                                                                                                                                                                                                                                                                                                                                                                                                                                                                                                                                                                                                                                                                                                                                                                                                                                                                                                                                                                                                                                                                                                                                                                                                                                                                                                                                                                                                                                                                                                                                                                                                                                                                                                                                                                                                                                                                                                                                                                                                                                                                                                                                                         |
|                                                | Mark F Richardson                                                                                                                                                                                                                                                                                                                                                                                                                                                                                                                                                                                                                                                                                                                                                                                                                                                                                                                                                                                                                                                                                                                                                                                                                                                                                                                                                                                                                                                                                                                                                                                                                                                                                                                                                                                                                                                                                                                                                                                                                                                                                                                                                                                                                                                                                                                                                                                                                                                                                                                                                                                                                                      |
|                                                | Tonia L Russell                                                                                                                                                                                                                                                                                                                                                                                                                                                                                                                                                                                                                                                                                                                                                                                                                                                                                                                                                                                                                                                                                                                                                                                                                                                                                                                                                                                                                                                                                                                                                                                                                                                                                                                                                                                                                                                                                                                                                                                                                                                                                                                                                                                                                                                                                                                                                                                                                                                                                                                                                                                                                                        |
|                                                | Marcelo Vallinoto                                                                                                                                                                                                                                                                                                                                                                                                                                                                                                                                                                                                                                                                                                                                                                                                                                                                                                                                                                                                                                                                                                                                                                                                                                                                                                                                                                                                                                                                                                                                                                                                                                                                                                                                                                                                                                                                                                                                                                                                                                                                                                                                                                                                                                                                                                                                                                                                                                                                                                                                                                                                                                      |
|                                                | Miguel Carneiro                                                                                                                                                                                                                                                                                                                                                                                                                                                                                                                                                                                                                                                                                                                                                                                                                                                                                                                                                                                                                                                                                                                                                                                                                                                                                                                                                                                                                                                                                                                                                                                                                                                                                                                                                                                                                                                                                                                                                                                                                                                                                                                                                                                                                                                                                                                                                                                                                                                                                                                                                                                                                                        |
|                                                | Nuno Ferrand                                                                                                                                                                                                                                                                                                                                                                                                                                                                                                                                                                                                                                                                                                                                                                                                                                                                                                                                                                                                                                                                                                                                                                                                                                                                                                                                                                                                                                                                                                                                                                                                                                                                                                                                                                                                                                                                                                                                                                                                                                                                                                                                                                                                                                                                                                                                                                                                                                                                                                                                                                                                                                           |
|                                                | Marc R Wilkins                                                                                                                                                                                                                                                                                                                                                                                                                                                                                                                                                                                                                                                                                                                                                                                                                                                                                                                                                                                                                                                                                                                                                                                                                                                                                                                                                                                                                                                                                                                                                                                                                                                                                                                                                                                                                                                                                                                                                                                                                                                                                                                                                                                                                                                                                                                                                                                                                                                                                                                                                                                                                                         |
|                                                | Fernando Sequeira                                                                                                                                                                                                                                                                                                                                                                                                                                                                                                                                                                                                                                                                                                                                                                                                                                                                                                                                                                                                                                                                                                                                                                                                                                                                                                                                                                                                                                                                                                                                                                                                                                                                                                                                                                                                                                                                                                                                                                                                                                                                                                                                                                                                                                                                                                                                                                                                                                                                                                                                                                                                                                      |
|                                                | Lee A Rollins                                                                                                                                                                                                                                                                                                                                                                                                                                                                                                                                                                                                                                                                                                                                                                                                                                                                                                                                                                                                                                                                                                                                                                                                                                                                                                                                                                                                                                                                                                                                                                                                                                                                                                                                                                                                                                                                                                                                                                                                                                                                                                                                                                                                                                                                                                                                                                                                                                                                                                                                                                                                                                          |
|                                                | Edward C Holmes                                                                                                                                                                                                                                                                                                                                                                                                                                                                                                                                                                                                                                                                                                                                                                                                                                                                                                                                                                                                                                                                                                                                                                                                                                                                                                                                                                                                                                                                                                                                                                                                                                                                                                                                                                                                                                                                                                                                                                                                                                                                                                                                                                                                                                                                                                                                                                                                                                                                                                                                                                                                                                        |
|                                                | Richard Shine                                                                                                                                                                                                                                                                                                                                                                                                                                                                                                                                                                                                                                                                                                                                                                                                                                                                                                                                                                                                                                                                                                                                                                                                                                                                                                                                                                                                                                                                                                                                                                                                                                                                                                                                                                                                                                                                                                                                                                                                                                                                                                                                                                                                                                                                                                                                                                                                                                                                                                                                                                                                                                          |
|                                                | Peter A White                                                                                                                                                                                                                                                                                                                                                                                                                                                                                                                                                                                                                                                                                                                                                                                                                                                                                                                                                                                                                                                                                                                                                                                                                                                                                                                                                                                                                                                                                                                                                                                                                                                                                                                                                                                                                                                                                                                                                                                                                                                                                                                                                                                                                                                                                                                                                                                                                                                                                                                                                                                                                                          |
| <b>Order of Authors Secondary Information:</b> |                                                                                                                                                                                                                                                                                                                                                                                                                                                                                                                                                                                                                                                                                                                                                                                                                                                                                                                                                                                                                                                                                                                                                                                                                                                                                                                                                                                                                                                                                                                                                                                                                                                                                                                                                                                                                                                                                                                                                                                                                                                                                                                                                                                                                                                                                                                                                                                                                                                                                                                                                                                                                                                        |
| <b>Response to Reviewers:</b>                  | <p>Please note that quoted text is from the manuscript. Additions or modifications to text within the manuscript are explicitly stated.</p> <p>Comment 1.</p> <p>This manuscript adopted "a hybrid de novo whole genome assembly strategy," a relatively new technique, which should require more quality controls than the conventional technique combining shotgun sequences, mate-pair sequences, PacBio long read sequences, and Hi-C or CHICAGO methods. Most comments from the reviewers including mine for basic analyses with the assembly are for quality controls, not for analyses "beyond the scope of this paper," as the authors say. Furthermore, they used a wild-caught frog, which must contain distinct alleles, probably making assembly processes difficult. How did the authors overcome allelic differences? I'm worried about one undesired possibility that the current assembly contains one of the two alleles, and short scaffolds contain fragments of the other alleles, which may explain many fragmented ORFs in the assembly as well as underestimation of the genome size by the k-mer genome size estimation and qPCR. Do the authors have any evidence to exclude this possibility?</p> <p>Response to comment 1:</p> <p>The DBG2OLC technique we employed is not unconventional. It has been used in over a dozen genome assemblies, including those published in GigaScience (golden mussel, European beech &amp; Chinese herbal fleabane), Nature Genetics (apple &amp; sea lamprey), Nature Plants (<i>Xerophyta viscosa</i>), Cell (Egyptian Roussette bat), and Genome Biology and Evolution (clam shrimp). Genome assembly is not a 'solved problem' and few (if any) assemblies use identical combinations of technology, sequencing depth and assembly/scaffolding methods. We agree that independent assembly of allelic variants is a potential issue for heterozygous non-haploid assemblies, and highlight it as a possible cause of the high ORF numbers (L225-7):</p> <p>"artefactual duplications in the genome assembly, either through under-assembly or legitimate assembly of two heterozygous diploid copies;"</p> <p>And L231-2:</p> <p>"Of the 3,279 complete BUSCO genes identified (Table 2), only 85 (2.59%) were duplicated. This suggests that there is not widespread duplication in the assembly."</p> <p>In addition, extensive assembly of allelic variants would inflate the genome assembly size dramatically, and we see no evidence of this. We also see a trend in the data (consistent with the contiguity statistics) that fragmentation is a likely cause for inflated</p> |

ORF counts (L264-9):

“Excluding proteins with annotation indicating possible viral or transposable element origin, 45.7% of "similar" proteins and 96.8% of "unknown" proteins had the same closest *X. tropicalis* blastp hit as another predicted protein. Consistent with this being related to gene fragmentation, there was a negative relationship between the number of cane toad proteins sharing a given *X. tropicalis* top hit, and how much of the *X. tropicalis* hit was covered by each cane toad protein.”

Although the evidence presented makes widespread duplicated assembly (allelic or otherwise) unlikely, we acknowledge that, as with all draft assemblies, there will be some scaffolds and ORFs that represent allelic variants. We have therefore added this caveat (L269-70):

“Nevertheless, it is likely that some of these protein fragments represent allelic variants that have been redundantly assembled.” [additional text in manuscript]

There is no consistent way to globally identify and distinguish these from duplications, particularly in a repeat-rich genome like the cane toad. We have therefore opted to adopt a conservative filtering approach as detailed analysis of genes/regions of interest should identify any such issues on a case-by-case basis. As previously noted (and see point 4 below), we have unambiguously stated that our statistics refer to the assembly and we stop short of making unsubstantiated claims about the cane toad genome. Impact on genome size is discussed in Point 2, below.

Comment 2:

In addition, the reported genome sizes of *Rhinella marina* (the same as *Bufo marinus*) varied between 3.98 and 5.65 Gb [26, 32-38]. Among the cited references, the papers by MacCulloch et al. (1996) and Chipman et al. (2001) appear to be reliable, because, in comparison with the genome size of *Xenopus laevis* (3.1 Gb), that of *Bufo marinus* was estimated to be 3.98 and 3.59, respectively, (the mean is 3.77 Gb) by assuming that 1pg DNA corresponds to 1 Gb. By the way, is *Rhinella marina* truly diploid? If so, its genome contains much more transposable elements and/or repetitive sequences than the allotetraploid genome of *Xenopus laevis*. According to the *X. laevis* genome paper (Session et al., 2016), total shotgun sequences in contigs (nucleotide stretches without N) are 2.45 Gb in allotetraploid *X. laevis*, which is similar to the final hybrid assembly of 2.55 Gb in diploid *R. marina*. This might imply again artificial sequence redundancy in the hybrid assembly due to allelic differences in wild *R. marina*. This may also explain the inconsistency between the flow cytometry-based genome size of 3.77 Gb and the k-mer-estimated genome size of ~2.0 Gb. Did the authors check artificial internal redundancy due to the two distinct alleles? The authors need to discuss this kind of issue in their paper.

Response to comment 2:

We have no evidence against diploidy in *Rhinella marina* and the published karyotype does not show evidence of higher ploidy. We did consider artificial sequence redundancy, however this would inflate the estimated genome size (and assembly), not reduce it, and so it cannot be the explanation for the observed differences. Likewise, if the qPCR primers were allele-specific (point 1), the apparent genome size would be doubled, not halved. The kmer method we used (GenomeScope) was a diploid method and explicitly incorporates allelic variation into its estimation model. As readers may not be familiar with this method, we have expanded our discussion of this issue with an extra a sentence to emphasise this point (L176-7):

“GenomeScope explicitly models heterozygous diploid kmer distributions, which should make it robust to the additional challenge of sequencing a wild animal. However, GenomeScope predictions are affected by non-uniform repeat distributions and this difference could indicate high copy number repeats in the genome that are difficult to model accurately.” [additional text in manuscript]

Comment 3:

In Summary: According to the authors, "Annotation predicted 58,302 protein coding genes" include many fragmented ORFs. Because of this, the number (58,302) is meaningless, which should be removed from the summary. In the answer, the authors wrote "however many of these may be bona fide functional members of the cane toad proteome," but what is the rationale to think like this? For example, what percentage of these ORFs are expressed? In general, such unexpressed ORFs are not counted as protein-coding genes. Therefore, the statement "however many of these may be bona fide functional members of the cane toad proteome" should be deleted if there is no supporting evidence.

Response to comment 3:

We have rephrased the sentence in the abstract (L62):

"Annotation predicted 25,846 protein coding genes with similarity to known proteins in SwissProt." [modified text in manuscript]

The manuscript includes analysis and discussion of transcriptomic support for the predictions, including a warning that some of the 58,302 predicted protein coding genes may be false annotations (L242-254). The quoted statement refers to predicted proteins that may originate from transposable elements or viruses. Exaptation of transposons and endogenous viral elements is common in nature and we have no reason to believe that it will not have happened in the cane toad. We have expanded the expression analysis as suggested to support this statement (and moved it to follow discussion of the expression data), L251-4:

"Further review of the predicted protein descriptions revealed 4,357 with likely origins in transposable elements (including 4,114 LINE-1 ORFs) and 215 from viruses. However, many of these may be bona fide functional members of the cane toad proteome; 1,447 (33.2%) "transposon" and 151 (70.2%) of "viral" transcripts had support for expression > 1 TPM." [additional text in manuscript]

Comment 4:

Fig. 5 (now Fig. 9) represents the feature of the assembly sequence, not the genome. The authors need to carefully state which it is in the figures, legends, and main text.

Response to comment 4:

This is clearly stated in the revised text and figure legend (emphasis added):

"RepeatMasker annotations from the MAKER pipeline support this interpretation, with over 4.1 million repeat sequences detected, accounting for 63.9% of the assembly (Table 5). The mean repeat length is 406 bp, which exceeds the Illumina read length used in our study (mean 140.6 bp paired-end). This makes short-read assembly of these regions difficult, as reflected by the poor ABySS contiguity (contig N50 = 583 bp, Table 2), and emphasises the need for long read data in this organism. The most abundant class of repeat elements are of unknown type (1.61 million elements covering 32.28% of the assembly), with DNA transposons the most abundant known class of element (817,262 repeats; 19.17% coverage). Of these, the most abundant are of the hAT-Ac (231,332 copies) and TcMar-Tc1 (226,145 copies) superfamilies (Table S4). Accounting for overlaps between repeat and gene features, 18.7% of the assembly (479,397,014 bp) has no annotation (Figure 9)."

The title of the figure is "Summary of the main annotation classes for *Rhinella marina* genome assembly."

**Additional Information:**

| Question                                                                                                                                                                                                                                                                                                                                                                                                                                                                                                                            | Response   |
|-------------------------------------------------------------------------------------------------------------------------------------------------------------------------------------------------------------------------------------------------------------------------------------------------------------------------------------------------------------------------------------------------------------------------------------------------------------------------------------------------------------------------------------|------------|
| <p>Are you submitting this manuscript to a special series or article collection?</p>                                                                                                                                                                                                                                                                                                                                                                                                                                                | <p>No</p>  |
| <p><b>Experimental design and statistics</b></p> <p>Full details of the experimental design and statistical methods used should be given in the Methods section, as detailed in our <a href="#">Minimum Standards Reporting Checklist</a>. Information essential to interpreting the data presented should be made available in the figure legends.</p> <p>Have you included all the information requested in your manuscript?</p>                                                                                                  | <p>Yes</p> |
| <p><b>Resources</b></p> <p>A description of all resources used, including antibodies, cell lines, animals and software tools, with enough information to allow them to be uniquely identified, should be included in the Methods section. Authors are strongly encouraged to cite <a href="#">Research Resource Identifiers</a> (RRIDs) for antibodies, model organisms and tools, where possible.</p> <p>Have you included the information requested as detailed in our <a href="#">Minimum Standards Reporting Checklist</a>?</p> | <p>Yes</p> |
| <p><b>Availability of data and materials</b></p> <p>All datasets and code on which the conclusions of the paper rely must be either included in your submission or deposited in <a href="#">publicly available repositories</a> (where available and ethically appropriate), referencing such data using a unique identifier in the references and in the “Availability of Data and Materials” section of your manuscript.</p>                                                                                                      | <p>Yes</p> |

Have you have met the above requirement as detailed in our [Minimum Standards Reporting Checklist?](#)

[Click here to view linked References](#)

GigaScience: Data Note

1 **Draft genome assembly of the invasive cane toad, *Rhinella marina***

2 **Richard J Edwards<sup>1</sup>, Daniel Enosi Tuipulotu<sup>1†</sup>, Timothy G Amos<sup>1†</sup>, Denis O'Meally<sup>2</sup>, Mark F**  
3 **Richardson<sup>3,4</sup>, Tonia L Russell<sup>5</sup>, Marcelo Vallinoto<sup>6,7</sup>, Miguel Carneiro<sup>6</sup>, Nuno Ferrand<sup>6,8,9</sup>, Marc**  
4 **R Wilkins<sup>1,5</sup>, Fernando Sequeira<sup>6</sup>, Lee A Rollins<sup>3,10</sup>, Edward C Holmes<sup>11</sup>, Richard Shine<sup>12</sup> and**  
5 **Peter A White<sup>1,\*</sup>**

6  
7 †These authors contributed equally to the work.

8  
9 <sup>1</sup>School of Biotechnology and Biomolecular Sciences, University of New South Wales, Sydney, NSW,  
10 Australia

11 <sup>2</sup>Sydney School of Veterinary Science, Faculty of Science, University of Sydney, Camperdown, New  
12 South Wales, Australia

13 <sup>3</sup>School of Life and Environmental Sciences, Centre for Integrative Ecology, Deakin University,  
14 Geelong, VIC, Australia

15 <sup>4</sup>Bioinformatics Core Research Group, Deakin University, Geelong, VIC, Australia

16 <sup>5</sup>Ramaciotti Centre for Genomics, University of New South Wales, Sydney, NSW, Australia

17 <sup>6</sup>CIBIO/*InBIO*, Centro de Investigação em Biodiversidade e Recursos Genéticos, Universidade do  
18 Porto, Vairão, Portugal

19 <sup>7</sup>Laboratório de Evolução, Instituto de Estudos Costeiros (IECOS), Universidade Federal do Pará,  
20 Bragança, Pará, Brazil

21 <sup>8</sup>Departamento de Biologia, Faculdade de Ciências, Universidade do Porto, Porto, Portugal

22 <sup>9</sup>Department of Zoology, Faculty of Sciences, University of Johannesburg, Auckland Park, South  
23 Africa

24 <sup>10</sup>Evolution and Ecology Research Centre, School of Biological Earth and Environmental Sciences,  
25 University of New South Wales, Sydney, NSW, Australia

1  
2  
3  
4  
5  
6  
7  
8  
9  
10  
11  
12  
13  
14  
15  
16  
17  
18  
19  
20  
21  
22  
23  
24  
25  
26  
27  
28  
29  
30  
31  
32  
33  
34  
35  
36  
37  
38  
39  
40  
41  
42  
43  
44  
45  
46  
47  
48  
49  
50  
51  
52  
53  
54  
55  
56  
57  
58  
59  
60  
61  
62  
63  
64  
65

26 <sup>11</sup>Marie Bashir Institute for Infectious Diseases and Biosecurity, Charles Perkins Centre, School of Life  
27 and Environmental Sciences and Sydney Medical School, University of Sydney, Sydney, NSW,  
28 Australia

29 <sup>12</sup>School of Life and Environmental Sciences, Faculty of Science, University of Sydney, Camperdown,  
30 New South Wales, Australia

31  
32 Emails of all authors: richard.edwards@unsw.edu.au (RJE), d.enedi@unsw.edu.au (DET),  
33 t.amos@unsw.edu.au (TGA), omeally@gmail.com (DO), m.richardson@deakin.edu.au (MFR),  
34 t.russell@unsw.edu.au (TLR), mvallinoto@cibio.up.pt (MV), miguel.carneiro@cibio.up.pt (MC),  
35 nferrand@cibio.up.pt (NF), m.wilkins@unsw.edu.au (MRW), fsequeira@cibio.up.pt (FS),  
36 l.rollins@unsw.edu.au (LAR), edward.holmes@sydney.edu.au (ECH), rick.shine@sydney.edu.au  
37 (RS), p.white@unsw.edu.au (PAW).

38  
39 \*Corresponding author address: School of Biotechnology and Biomolecular Sciences, University of  
40 New South Wales, Sydney, NSW, Australia. Tel: +61-293853780; Email: [p.white@unsw.edu.au](mailto:p.white@unsw.edu.au)  
41 Peter White ORCID ID: 0000-0002-6046-9631



## 52 Abstract

1  
2  
3 53 **Background:** The cane toad (*Rhinella marina* formerly *Bufo marinus*) is a species native to Central  
4  
5 54 and South America that has spread across many regions of the globe. Cane toads are known for their  
6  
7 55 rapid adaptation and deleterious impacts on native fauna in invaded regions. However, despite an iconic  
8  
9 56 status, there are major gaps in our understanding of cane toad genetics. The availability of a genome  
10  
11 57 would help to close these gaps and accelerate cane toad research. **Findings:** We report a draft genome  
12  
13 58 assembly for *R. marina*, the first of its kind for the Bufonidae family. We used a combination of long  
14  
15 59 read PacBio RS II and short read Illumina HiSeq X sequencing to generate a total of 359.5 Gb of raw  
16  
17 60 sequence data. The final hybrid assembly of 31,392 scaffolds was 2.55 Gb in length with a scaffold  
18  
19  
20 61 N50 of 168 kb. BUSCO analysis revealed that the assembly included full length or partial fragments of  
22  
23 62 90.6% of tetrapod universal single-copy orthologs (n=3950), illustrating that the gene-containing  
24  
25 63 regions have been well-assembled. Annotation predicted 25,846 protein coding genes with similarity  
26  
27 64 to known proteins in SwissProt. Repeat sequences were estimated to account for 63.9% of the assembly.  
28  
29  
30 65 **Conclusion:** The *R. marina* draft genome assembly will be an invaluable resource that can be used to  
31  
32 66 further probe the biology of this invasive species. Future analysis of the genome will provide insights  
33  
34 67 into cane toad evolution and enrich our understanding of their interplay with the ecosystem at large.  
35  
36  
37 68

38  
39 69 **Keywords:** cane toad; *Rhinella marina*; sequencing; hybrid assembly; genome; annotation  
40  
41  
42 70  
43  
44 71  
45  
46  
47 72  
48  
49  
50 73  
51  
52  
53  
54  
55  
56  
57  
58  
59  
60  
61  
62  
63  
64  
65

## 74 **Data Description**

### 75 **Introduction**

76 The cane toad (*Rhinella marina* formerly *Bufo marinus*) (Figure 1) is a true toad (Bufonidae) native to  
77 Central and South America that has been introduced to many areas across the globe [1]. Since its  
78 introduction into Queensland in 1935, the cane toad has spread widely and now occupies more than 1.2  
79 million square kilometres of the Australian continent, fatally poisoning predators like the northern quoll,  
80 freshwater crocodiles, and several species of native lizards and snakes [1-5]. The ability of cane toads  
81 to kill predators with toxic secretions has contributed to the success of their invasion [1]. To date,  
82 research on cane toads has focused primarily on ecological impacts, rapid evolution of phenotypic traits,  
83 and population genetics using neutral markers [6, 7], with limited knowledge of the genetic changes  
84 that allow the cane toad to thrive in the Australian environment [8-11]. A reference genome will be  
85 useful for studying loci subject to rapid evolution and could provide valuable insights into how invasive  
86 species adapt to new environments. Amphibian genomes have a preponderance of repetitive DNA [12,  
87 13], confounding assembly with the limited read lengths of first- and second-generation sequencing  
88 technologies. Here, we employ a hybrid assembly of PacBio long reads and Illumina short reads (Figure  
89 2) to overcome assembly challenges presented by the repetitive nature of the cane toad genome. Using  
90 this approach, we assembled a draft genome of *R. marina* that is comparable in contiguity and  
91 completeness to other published anuran genomes [14-17]. We used our previously published  
92 transcriptomic data [18] and other published anuran sequences to annotate the genome. Our draft cane  
93 toad assembly will serve as a reference for genetic and evolutionary studies, and provides a template  
94 for continued refinement with additional sequencing efforts.

### 95 **Sample collection, library construction and sequencing**

96 Adult female cane toads were collected by hand from Forrest River in Oombulgurri, WA (15.1818°S,  
97 127.8413°E) in June 2015. Toads were placed in individual damp cloth bags and transported by plane  
98 to Sydney, NSW before they were anaesthetised by refrigeration for four hours and killed by subsequent  
99 freezing. High-molecular weight genomic DNA (gDNA) was extracted from the liver of a single female

100 using the genomic-tip 100/G kit (Qiagen, Hilden, Germany). This was performed with supplemental  
101 RNase (Astral Scientific, Taren Point, Australia) and proteinase K (NEB, Ipswich, MA, USA)  
102 treatment, as per the manufacturer's instructions. Isolated genomic DNA was further purified using  
103 AMPure XP beads (Beckman Coulter, Brea, CA, USA) to eliminate sequencing inhibitors. DNA  
104 quantity was assessed using the Quanti-iT PicoGreen dsDNA kit (Thermo Fisher Scientific, Waltham,  
105 MA, USA), DNA purity was calculated using a Nanodrop spectrophotometer (Thermo Fisher  
106 Scientific), and molecular integrity assessed by pulse-field gel electrophoresis.

107 For short read sequencing, a paired-end library was constructed from the gDNA using the TruSeq PCR-  
108 free library preparation kit (Illumina, San Diego, CA, USA). Insert sizes ranged between 200-800 bp.  
109 This library was sequenced ( $2 \times 150$  bp) on the HiSeq X Ten platform (Illumina) to generate  
110 approximately 282.9 Gb of raw data (Table 1). Illumina short sequencing reads were assessed for  
111 quality using FastQC v0.10.1 [19]. Low quality reads filtered were trimmed using Trimmomatic v0.36  
112 [20] with a Q30 threshold (LEADING:30, TRAILING:30, SLIDINGWINDOW:4:30) and a minimum  
113 100 bp read length, leaving 64.9% of the reads generated, of which 75.2% were in retained read pairs.

114 For long read sequencing, we utilised the single-molecule real time (SMRT) sequencing technology  
115 (Pacific Biosciences, Menlo Park, CA, USA). Four SMRTbell libraries were prepared from gDNA  
116 using the SMRTBell template preparation kit 1.0 (Pacific Biosciences). To increase subread length,  
117 either 15-50 kb or 20-50 kb BluePippin size selection (Sage Science, Beverly, MA, USA) was  
118 performed on each library. Recovered fragments were sequenced using P6C4 sequencing chemistry on  
119 the RS II platform (240 min movie time). The four SMRTbell libraries were sequenced on a total of 97  
120 SMRT cells to generate 7,745,233 subreads for a total of 76.6 Gb of raw data. Collectively, short and  
121 long read sequencing produced around 359.5 Gb of data (Table 1).

## 122 **Genome assembly**

123 We employed a hybrid *de novo* whole genome assembly strategy, combining both short read and long  
124 read data. Trimmed Q30-filtered short reads were *de novo* assembled with ABySS v1.3.6 [21] using  
125  $k=64$  and default parameters (contig N50 = 583 bp) (Table 2). Long sequence reads were *de novo*

126 assembled using the program DBG2OLC [22] (k 17 AdaptiveTh 0.0001 KmerCovTh 2 MinOverlap 20  
1 RemoveChimera 1) (contig N50 = 167.04 kbp) (Table 2). Following this, both assemblies were merged  
2  
3  
4 128 together using the hybrid assembler ('sparc') tool of DBG2OLC with default parameters, combining  
5  
6 129 the contiguity of the long read data with the improved accuracy of the high coverage Illumina assembly.  
7  
8  
9 130 This hybrid assembly (v2.0) was twice 'polished' to remove errors. In the first round, the Q30 trimmed  
10  
11 131 Illumina reads were mapped to the hybrid assembly with bowtie v2.2.9 [23] and filtered for proper pairs  
12  
13 132 using samtools v1.3.1 [24]. Scaffolds were polished with Pilon v1.21 [25] to generate the second  
14  
15 133 iteration of the assembled genome (v2.1). In the second round, PacBio subreads were mapped to  
16  
17 134 assembly v2.1 for error correction using SMRT analysis software (Pacific Biosciences): PacBio  
18  
19 135 subreads for each library were converted to BAM format with bax2bam v0.0.08 and aligned to the  
20  
21 136 genome using palign v.0.3.0. BAM alignment files were combined using samtools merge v1.3.1 and  
22  
23 137 the scaffolds polished with Arrow v2.1.0 to generate the final genome assembly (v2.2). Our final draft  
24  
25 138 assembly of the cane toad genome (v2.2) has 31,392 scaffolds with an N50 of 167 kb (Table 2). The  
26  
27 139 GC content (43.23%) is within 1% of the published estimate of 44.17%, determined by flow cytometry  
28  
29  
30  
31 140 [26].  
32  
33

### 34 141 **Assessment of genome completeness**

35  
36  
37 142 BUSCO [27] analysis of conserved single copy orthologues is widely used as a proxy for genome  
38  
39 143 completeness and accuracy. While direct comparisons are only truly valid within an organism,  
40  
41 144 comparing BUSCO scores to genomes from related organisms provides a useful benchmark. We ran  
42  
43 145 BUSCO v2.0.1 (short mode, lineage tetrapoda\_odb9, BLAST+ v2.2.31 [28], HMMer v3.1b2 [29],  
44  
45 146 AUGUSTUS v3.2.2 [30], EMBOSS v6.5.7 [31]) on each of our assemblies, along with four published  
46  
47 147 anuran genomes (Figure 3, Table 2). The hybrid assembly combined the completeness of the long read  
48  
49 148 assembly with the accuracy of the short read assembly, providing an enormous boost in BUSCO  
50  
51 149 completeness from less than 50% full and partial orthologs to over 90%. Error correction through pilon  
52  
53 150 and arrow polishing had a positive effect on the BUSCO measurement of genome completeness, with  
54  
55 151 an increase of 7.8% in the number of full and partial orthologs between v2.0 and 2.2. For the polished  
56  
57 152 assembly (v2.2), 3279 (83.0%) of the 3950 ultra-conserved tetrapod genes were complete, 296 (7.5%)  
58  
59  
60

153 were fragmentary and 375 (9.5%) were missing. It should be noted that these numbers mask some  
154 underlying complexity of BUSCO assessments; aggregate improvements in BUSCO scores with  
155 polishing include some losses as well as gains. Taking the best rating for each BUSCO in v2.0, v2.1 or  
156 v2.2 reduces the number of missing BUSCO genes to 326 (8.3%) and increases the complete number  
157 to 3366 (85.2%) (Figure 3, “*R. marina* (combined)”). This is explored further in the “Genome  
158 annotation and prediction” section, below. Overall, BUSCO metrics indicate that our draft *R. marina*  
159 genome is approaching the quality and completeness of the widely used anuran amphibian reference  
160 genomes for *X. laevis* (v9.2) [17] and *X. tropicalis* (v9.1) [16] and compares well to the recently  
161 published neobatrachian genomes of *Nanorana parkeri* (v2) [15] and *Lithobates catesbeianus* (v2.1)  
162 [14].

### 163 **Estimation of *R. marina* genome size**

164 Previous reports have estimated the size of the cane toad genome from 3.98-5.65 Gb using either  
165 densitometry or flow cytometry analysis of stained nuclei within erythrocytes, hepatocytes and renal  
166 cells [26, 32-38]. We employed two alternative strategies to measure the genome size, using short read  
167 k-mer distributions and qPCR of single copy genes. K-mer frequencies were calculated for both raw  
168 and trimmed Q30-filtered paired-end short reads (Table 1) with Jellyfish v2.2.3 [39] using  $k=21$  and  
169  $k=23$ , and a maximum k-mer count of 10,000. K-mer distributions were analysed using GenomeScope  
170 [40] with mean read lengths of 148 bp (raw) or 141 bp (Q30) and k-mer coverage cut-offs of 1000 and  
171 10,000 (Table 3, Figure 4). GenomeScope gave genome size estimates ranging from 1.77 Gb to 2.30  
172 Gb with the raw reads giving consistently larger estimates (1.85 Gb to 2.30 Gb) than the trimmed and  
173 filtered reads (1.77 Gb to 2.10 Gb). Estimates of the unique (single copy) region of the genome were  
174 more consistent, ranging from 1.31 Gb to 1.46 Gb, with  $k=23$  estimates 99 Mb (raw) or 80 Mb (Q30)  
175 higher than  $k=21$ . Increasing the GenomeScope maximum k-mer coverage threshold had the greatest  
176 effect on predicted genome size, increasing repeat length estimates by 274 Mb to 385 Mb.  
177 **GenomeScope explicitly models heterozygous diploid kmer distributions, which should make it robust**  
178 **to the additional challenge of sequencing a wild animal. However,** GenomeScope predictions are  
179 affected by non-uniform repeat distributions and this difference could indicate high copy number

180 repeats in the genome that are difficult to model accurately. It is possible that high frequency repeats  
181 with raw sequencing counts exceeding 10,000 are resulting in an underestimate of total repeat length  
182 and therefore genome size, compared to the previous densitometry and flow cytometry predictions.

183 In the second approach, the *zfp292* (zinc finger protein 292) gene was selected from our BUSCO  
184 analysis as a single-copy target for genome estimation by qPCR [41]. First, PCR was used to amplify a  
185 326 bp region of *zfp292* (scaffold 6589, position 345,750-346,075) in a 25  $\mu$ L reaction that contained  
186 50 ng of gDNA, 200  $\mu$ M dNTP, 0.625 units of Taq polymerase (Invitrogen), 10  $\times$  Taq polymerase  
187 buffer (Invitrogen) and 0.4  $\mu$ M of each primer (Table S1). The amplicon was cloned into the pGEM-T  
188 Easy vector (Promega, Madison, WI, USA) and the resultant plasmid was linearised with NdeI before  
189 being serially diluted to generate a qPCR standard ( $10^1$ - $10^9$  copies/ $\mu$ L). To amplify a smaller region  
190 (120 bp) within *zfp292* (scaffold 6589, position 345,858-345,977) gDNA (10-25 ng) or 1  $\mu$ L of the  
191 diluted standards were used as a template for a 20  $\mu$ L qPCR reaction containing 2  $\times$  iTaq SYBR Green  
192 mastermix (BioRad, Hercules, CA, USA) and 0.5  $\mu$ M of each primer (Table S1). Cycle threshold values  
193 obtained for each plasmid dilution were used to generate a standard curve and infer the number of  
194 *zfp292* amplicons generated from the template gDNA of known quantity. Genome sizes were generated  
195 from the formulae outlined by [41] and the average of two estimates (2.81 Gb and 1.94 Gb) were used  
196 to obtain a genome size of 2.38 Gb. This genome size provides an estimated combined 151X sequencing  
197 coverage (119X Illumina and 32X PacBio) (Table 4).

198 Our genome size estimation of 1.98 to 2.38 Gbp is smaller than the 2.55 Gbp assembly size, and differs  
199 significantly from previously published estimates of 4 Gbp or more for this species. We suggest this is  
200 a result of the repetitive nature of the genome (see below). Given this is the first estimate of the cane  
201 toad genome size using either k-mer or qPCR analysis, further investigations are required to more  
202 clearly understand the discrepancy in our estimates with respect to published genome sizes. Here we  
203 estimate the depth of sequencing coverage using both sequence-based and cytometric genome size  
204 measures (Table 4).

## 205 **Genome annotation and gene prediction**

206 Annotation of the draft genome was performed using MAKER2 v2.31.6 [42], BLAST+ v2.2.31 [28],  
207 AUGUSTUS v3.2.2 [30], Exonerate v2.2.0 [43], RepeatMasker v4.0.6 [44] (DFAM [45], Library  
208 Dfam\_1.2; RMLibrary v20150807), RepeatModeler v1.0.8 [46] and SNAP v2013-11-29 [47] using all  
209 SwissProt protein sequences (downloaded 2017-02-23)[48] . AUGUSTUS was trained using BUSCO  
210 v2.0.1 (long mode, lineage tetrapoda\_odb9) and a multi-tissue reference transcriptome we previously  
211 generated from tadpoles and six adult cane toad tissues [18] (available from GigaDB [49], Genbank  
212 accession PRJNA383966). Whole-tadpoles and the brain, liver, spleen, muscle, ovary and testes of adult  
213 toads from Australia and Brazil were used to prepare cDNA libraries for the multi-tissue transcriptome  
214 sequencing. After the initial training run, two further iterations of MAKER2 were run using HMMs  
215 from SNAP training created from the previous run. Functional annotation of protein-coding genes  
216 predicted by MAKER2 were generated using Interproscan 5.25-64.0, with the following settings: -dp -  
217 t p -pa -goterms -iplookup -appl TIGRFAM, SFLD, Phobius, SUPERFAMILY, PANTHER, Gene3D,  
218 Hamap, ProSiteProfiles, Coils, SMART, CDD, PRINTS, ProSitePatterns, SignalP\_EUK, Pfam,  
219 ProDom, MobiDBLite, PIRSF, TMHMM. BLAST+ v2.6.0 [28] was used to annotate predicted genes  
220 using all Swissprot proteins (release 2017\_08, downloaded 2017-09-01) [48] using the following  
221 settings: -evaluate 0.000001 -seg yes -soft\_masking true -lcase\_masking -max\_hsps 1.

222 In total, 58,302 protein-coding genes were predicted by the MAKER pipeline with an average of 5.3  
223 exons and 4.3 introns per gene (Table 5). Of these, 5,225 are single exon genes, giving 4.7 introns per  
224 multi-exon gene with an average intron length of 4.08 kb. Predicted coding sequences make up 2.38%  
225 of the assembly. MAKER predicted considerably more than the approximately twenty thousand genes  
226 expected for a typical vertebrate genome. There are two likely explanations for this: (1) artefactual  
227 duplications in the genome assembly, either through under-assembly or legitimate assembly of two  
228 heterozygous diploid copies; (2) over-prediction of proteins during genome annotation, including  
229 pseudogenes with high homology to functional genes, proteins from transposable elements or other  
230 repeats, and multiple fragments of open reading frames (ORFs) from the same gene (due to  
231 fragmentation of the genome) and lncRNA genes that have been incorrectly assigned a coding sequence.

232 Of the 3,279 complete BUSCO genes identified (Table 2), only 85 (2.59%) were duplicated. This  
233 suggests that there is not widespread duplication in the assembly. Only 25,846 predicted genes were  
234 annotated as similar to known proteins in SwissProt, with the remaining 32,456 predictions “of  
235 unknown function”. This is consistent with over-prediction being the primary cause of inflated gene  
236 numbers. Poor quality protein predictions are generally shorter (generated from fragmented or random  
237 ORFs) and have a larger Annotation Edit Distance (AED) when compared to real proteins. Consistent  
238 with this, the predicted proteins of unknown function are shorter in sequence (median length 171 aa) to  
239 those with Swissprot hits (median length 388 aa) (Figure 5A) and have a greater AED (median 0.37  
240 versus 0.2) (Figure 5B). To investigate this further, predicted transcript and protein sequences were  
241 searched against the published *de novo* assembled transcriptome [18] using BLAST+ v2.2.31 [28]  
242 blastn or tblastn (top 10 hits, e-value <  $10^{-10}$ ) and compiled with GABLAM v2.28.3 [50]. For 56.5% of  
243 proteins with functional annotation, 95%+ of the protein length mapped to the top transcript hit (Table  
244 6). Only 27.1% of unknown proteins had 95%+ coverage in the top transcript hit, which is again  
245 consistent with over-prediction. We also reanalysed the multi-tissue RNA-Seq data from Richardson *et*  
246 *al.* [18] by mapping the reads onto the MAKER predicted transcripts. Filtered reads (adaptor sequences  
247 and reads with avg. Phred < 30 removed) were mapped with Salmon v0.8.0 [51] (Quasi-mapping default  
248 settings, IU libtype parameter). Read counts were converted into transcripts per million (TPM) by  
249 normalising by transcript length, dividing by the sum of the length-normalised read counts, and then  
250 multiplying by one million. We observed lower expression levels overall in the “unknown” set (Figure  
251 6). With the caveat that real proteins may have very low expression, this is also consistent with the  
252 “unknown” gene set containing false annotations. **Further review of the predicted protein descriptions  
253 revealed 4,357 with likely origins in transposable elements (including 4,114 LINE-1 ORFs) and 215  
254 from viruses. However, many of these may be bona fide functional members of the cane toad proteome:  
255 1,447 (33.2%) “transposon” and 151 (70.2%) of “viral” transcripts had support for expression > 1 TPM.**  
256 To investigate the role of fragmented ORFs, we downloaded the Quest For Orthologues (QFO)  
257 reference proteomes (QFO 04/18) [52] and used BLAST+ v2.2.31 [28] blastp (e-value <  $10^{-7}$ ) to identify  
258 the top hit for each predicted protein in (a) all eukaryote reference proteomes, and (b) the *Xenopus*



259 *tropicalis* reference proteome. BLAST results were converted into global coverage with GABLAM  
1  
2 260 v2.28.3 [50]. As expected, the vast majority (99.6%) of “similar” proteins had a blastp hit the QFO  
3  
4 261 proteomes (data not shown). Perhaps surprisingly, nearly two thirds (66.5%) of “unknown” proteins  
5  
6 262 also had a blastp hit, but these had lower coverage of the reference proteins than did proteins in the  
7  
8  
9 263 “similar” class (data not shown). A “combined coverage” score was calculated for each protein, taking  
10  
11 264 the minimum percentage coverage of either the query protein or its top QFO hit. This metric was related  
12  
13 265 to annotation quality, showing an inverse relationship with AED (data not shown). Excluding proteins  
14  
15 266 with annotation indicating possible viral or transposable element origin, 45.7% of “similar” proteins  
16  
17 267 and 96.8% of “unknown” proteins had the same closest *X. tropicalis* blastp hit as another predicted  
18  
19 268 protein. Consistent with this being related to gene fragmentation, there was a negative relationship  
20  
21 269 between the number of cane toad proteins sharing a given *X. tropicalis* top hit, and how much of the *X.*  
22  
23 270 *tropicalis* hit was covered by each cane toad protein. **Nevertheless, it is likely that some of these protein**  
24  
25 271 **fragments represent allelic variants that have been redundantly assembled.**

28  
29 272 We ran BUSCO v2.0.1 (short mode, lineage tetrapoda\_odb9, BLAST+ v2.2.31 [28], HMMer v3.1b2  
30  
31 273 [29], AUGUSTUS v3.2.2 [30], EMBOSS v6.5.7 [31]) on the MAKER2 transcriptome and proteome  
32  
33 274 and retained the most complete rating for each gene (Figure 7A, Table S2, “Annotation”). MAKER  
34  
35 275 annotation had fewer missing BUSCO genes than the v2.2 assembly (314 vs 375) but many more  
36  
37 276 fragmented (561 vs 296). Equivalent BUSCO analysis of the Richardson *et al.* transcriptome [18] was  
38  
39 277 only missing 296 genes. However, as seen with the assembly versions, these values mask hidden  
40  
41 278 complexity. Combined BUSCO analysis of our hybrid assembly (v2.0, v2.1, v2.2) and annotation,  
42  
43 279 revealed only 181 missing genes (Figure 7A, Table S2, “GigaDB”). Furthermore, >50% of the 279  
44  
45 280 genes “Missing” in the transcriptome are found in the genome and/or its annotation (Figure 7B, Table  
46  
47 281 S2). When the transcriptome and our genome are combined, only 68 BUSCO genes (1.7%) are  
48  
49 282 “Missing” and 3845 (97.3%) are “Complete” (Figure 7B, Table S2, “CaneToad”). This highlights the  
50  
51 283 usefulness of our assembly, and illustrates the complementary nature of genome and transcriptome data:  
52  
53 284 the former is more comprehensive but more difficult to assemble and annotate, whereas the latter is  
54  
55 285 easier to assemble into full-length coding sequences but will miss some tissue-specific and lowly  
56  
57  
58  
59  
60

286 expressed genes. Some of the remaining "Missing" BUSCO genes may be present but too fragmented  
287 to reach the score threshold.

288 Future work will be needed to improve the quality of gene annotation. We have included all of the  
289 MAKER2 predictions in our annotation and a full table of protein statistics and top blastp hits from this  
290 analysis for further biological analyses (Table S3). Annotation has also been made available via a  
291 WebApollo [53] genome browser (<http://edwapollo.babs.unsw.edu.au/>) and an associated search tool  
292 (<http://www.slimsuite.unsw.edu.au/servers/apollo.php>). This will facilitate community curation and  
293 annotation of genes of interest. For researchers who would like to use cane toad proteins in general  
294 evolutionary analyses, we have also created a "high quality" dataset of 6,580 protein-coding genes with  
295 an AED no greater than 0.25 and at least 90% reciprocal coverage of its top QFO blastp hit, excluding  
296 possible viral and transposon proteins, available from the *GigaScience* database.

### 297 **Phylogenetic analysis of high quality proteins**

298 To further validate the high-quality protein data set, GOPHER [54] v3.4.2 was used to predict  
299 orthologues for each protein. QFO (04/18) [52] eukaryotic reference proteomes were supplemented  
300 with Uniprot Reference proteomes for *Lithobates catesbeiana* (UP000228934) [14] and *Xenopus laevis*  
301 (UP000186698) [17] and the annotated protein sequences of *Nanorana parkeri* v2 [15]. GOPHER  
302 orthologues were predicted with default settings based on a modified mutual best hit algorithm that  
303 accounts for one-to-many or many-to-many orthologous relationships and retains the closest orthologue  
304 from each species. The closest orthologues were aligned with MAFFT [55] v7.310 (default settings)  
305 and phylogenetic trees inferred with IQ-TREE [56] v1.6.1 (default settings) for alignments containing  
306 at least three sequences. Phylogenetic trees were inferred in this manner for 6,417 of the 6,580 high  
307 quality proteins. A supertree was then constructed from the 6,417 individual protein trees using CLANN  
308 [57] v4.2.2 (DFIT Most Similar Supertree Algorithm) (Figure 8, Figure S1). Branch consistency was  
309 calculated for each branch as the proportion of source trees with taxa either side of the branch that have  
310 no conflicts in terms of the placement of those taxa. The supertree supports the known phylogeny for  
311 amphibians used in this study, giving additional confidence in the quality and utility of these protein  
312 annotations. All alignments and trees are available in supplementary data via the *GigaScience* database.

313

1  
2

## 314 **Repeat identification and analysis**

3  
4  
5

6 315 The cane toad genome has proven very difficult to assemble using short reads alone, which suggests a  
7  
8 316 high frequency of repetitive sequences, as for other amphibians [12, 13]. RepeatMasker annotations  
9  
10 317 from the MAKER pipeline support this interpretation, with over 4.1 million repeat sequences detected,  
11  
12 318 accounting for 63.9% of the assembly (Table 5). The mean repeat length is 406 bp, which exceeds the  
13  
14  
15 319 Illumina read length used in our study (mean 140.6 bp paired-end). This makes short-read assembly of  
16  
17 320 these regions difficult, as reflected by the poor ABySS contiguity (contig N50 = 583 bp, Table 2), and  
18  
19 321 emphasises the need for long read data in this organism. The most abundant class of repeat elements  
20  
21 322 are of unknown type (1.61 million elements covering 32.28% of the assembly), with DNA transposons  
22  
23 323 the most abundant known class of element (817,262 repeats; 19.17% coverage). Of these, the most  
24  
25 324 abundant are of the hAT-Ac (231,332 copies) and TcMar-Tc1 (226,145 copies) superfamilies (Table  
26  
27 325 S4). Accounting for overlaps between repeat and gene features, 18.7% of the assembly (479,397,014  
28  
29 326 bp) has no annotation (Figure 9).

30  
31  
32  
33

## 327 **Conclusion**

34  
35  
36

37 328 This draft genome assembly will be an invaluable tool for advancing knowledge of anuran biology,  
38  
39 329 genetics and the evolution of invasive species. Furthermore, we envisage these data will facilitate the  
40  
41 330 development of biocontrol strategies that reduce the impact of cane toads on native fauna.

42  
43  
44

## 331 **Availability of supporting data**

45  
46  
47

48 332 Raw genomic sequencing data (Illumina and PacBio) and assembled scaffolds have been deposited in  
49  
50 333 the ENA with the study accession PRJEB24695 and assembly accession GCA\_900303285. The genome  
51  
52 334 assembly and annotation are also available in the *GigaScience* database, and via a WebApollo [53]  
53  
54 335 genome browser and an associated search tool [59]. Data further supporting this work is available in  
55  
56 336 the GigaScience database, GigaDB [60].

57  
58  
59  
60

337 **List of abbreviations**

1  
2  
3 338 AED: annotation edit distance; BUSCO: Benchmarking Universal Single-Copy Orthologs; BLAST:  
4  
5 339 Basic Local Alignment Search Tool, qPCR: quantitative polymerase chain reaction, HMM: hidden  
6  
7 340 Markov model, CDS: coding sequence; bp: base pair; gDNA: genomic DNA; ORF: open reading frame;  
8  
9 341 QFO: Quest For Orthologues; SMRT: single-molecule real time; SINE: short interspersed nuclear  
10  
11 342 element; LINE: long interspersed nuclear element, LTR: long terminal repeat; TE: transposable  
12  
13 343 elements; TPM: transcripts per million; UTR: untranslated region, s.f.: significant figure  
14  
15

16  
17 344 **Additional files**

18  
19  
20 345 Figure S1. Phylogenetic supertree constructed from phylogenetic trees for 6,417 high confidence cane  
21  
22 346 toad proteins.

23  
24  
25 347 Table S1. Primers used for genome size estimation by single copy gene qPCR.

26  
27  
28 348 Table S2. Individual and combined full BUSCO gene ratings for cane toad assemblies, annotation,  
29  
30 349 transcriptome.

31  
32  
33 350 Table S3. Sequence statistics, top BLAST hits, and classification for MAKER2 annotations.

34  
35  
36 351 Table S4. RepeatMasker statistics broken down by repeat category.  
37  
38

39 352 **Ethics approval and consent to participate**

40  
41 353 All experimentation was performed under the approval of the University of Sydney Animal Ethics  
42  
43  
44 354 Committee.  
45  
46

47 355 **Consent for publication**

48  
49  
50 356 Not applicable  
51  
52

53 357 **Competing interests**

54  
55  
56 358 The authors declare that they have no competing interests.  
57  
58  
59  
60

359 **Funding**

1  
2  
3 360 This work was supported by the Cane Toad Genome Consortium and Bioplatforms Australia. **Funding**  
4  
5 361 **awarded to L.A.R. and R.S was provided by the Australian Research Council (DP160102991).** L.A.R.  
6  
7 362 is funded by ARC DECRA Fellowship (DE150101393). R.S. is funded by ARC Australian Laureate  
8  
9 363 Fellowship (FL120100074). E.C.H. is funded by ARC Australian Laureate Fellowship (FL170100022).  
10  
11 364 M.R.W. and the Ramaciotti Centre for Genomics acknowledge infrastructure funding from the  
12  
13 365 Australian Research Council (LE150100031), the Australian Government NCRIS scheme administered  
14  
15 366 by Bioplatforms Australia and the New South Wales Government RAAP scheme. M.V. is supported  
16  
17 367 by a CNPq fellowship (302892/2016-8). D.E.T. was supported through an Australian Government  
18  
19 368 Research Training Program (RTP) scholarship.  
20  
21  
22  
23

24 369 **Author's contributions**

25  
26 370 P.A.W coordinated the project. P.A.W, R.S, E.C.H, L.A.R, R.J.E, M.W. designed the study. P.A.W,  
27  
28 371 R.S, E.C.H, L.A.R, R.J.E and F.S funded the project. R.S provided the cane toad samples. D.E.T  
29  
30 372 performed the genomic DNA extraction, PCR experiments and data analysis. T.L.R performed the  
31  
32 373 sequencing. R.J.E and T.G.A performed the genome assemblies and primary data analysis. D.O and  
33  
34 374 T.G.A. performed the genome annotation. R.J.E, D.E.T, T.G.A and P.A.W and wrote the manuscript.  
35  
36 375 All authors edited and approved the final manuscript.  
37  
38  
39  
40

41 376 **Acknowledgements**

42  
43 377 We thank the Ramaciotti Centre for Genomics, UNSW and the Kinghorn Centre for Clinical Genomics  
44  
45 378 at the Garvan Institute of Medical Research who performed the sequencing in this study. This project  
46  
47 379 was undertaken with the assistance of resources and services from the National Computational  
48  
49 380 Infrastructure (NCI), which is supported by the Australian Government. This project used  
50  
51 381 computational resources from Intersect, which were in part supported by the Australian Research  
52  
53 382 Council. The authors acknowledge UNSW Science's high performance computing cluster (Katana), the  
54  
55 383 UNSW School of Biotechnology and Biomolecular Sciences high memory node, the Sydney  
56  
57 384 Informatics Hub and the University of Sydney's high performance computing cluster (Artemis) for  
58  
59  
60  
61  
62  
63  
64  
65

385 providing the high performance computing resources that have contributed to the research results  
 1  
 2 386 reported within this paper. We thank the members of the UNSW Science Faculty Computing unit,  
 3  
 4 387 particularly Duncan Smith, for all his help getting software installed and running on the katana computer  
 5  
 6 388 cluster. We thank Dr Andrew Kelly for early discussions on cane toad genome size and technical  
 7  
 8 389 assistance with gDNA extractions.  
 9

## 390 References

- 15 391 1. Shine R. The ecological impact of invasive cane toads (*Bufo marinus*) in Australia. *The*  
 16 392 *Quarterly Review of Biology*. 2010;85 3:253-91.
- 17 393 2. Phillips BL, Brown GP, Greenlees M, Webb JK and Shine R. Rapid expansion of the cane toad  
 18 394 (*Bufo marinus*) invasion front in tropical Australia. *Austral Ecology*. 2007;32 2:169-76.
- 19 395 3. Phillips BL, Brown GP and Shine R. Assessing the potential impact of cane toads on Australian  
 20 396 snakes. *Conservation Biology*. 2003;17 6:1738-47.
- 21 397 4. Smith JG and Phillips BL. Toxic tucker: the potential impact of cane toads on Australian  
 22 398 reptiles. *Pacific Conservation Biology*. 2006;12 1:40-9.
- 23 399 5. Urban MC, Phillips BL, Skelly DK and Shine R. The cane toad's (*Chaunus* [*Bufo*] *marinus*)  
 24 400 increasing ability to invade Australia is revealed by a dynamically updated range model.  
 25 401 *Proceedings of the Royal Society of London B: Biological Sciences*. 2007;274 1616:1413-9.
- 26 402 6. Slade R and Moritz C. Phylogeography of *Bufo marinus* from its natural and introduced ranges.  
 27 403 *Proceedings of the Royal Society of London B: Biological Sciences*. 1998;265 1398:769-77.
- 28 404 7. Sequeira F, Sodr e D, Ferrand N, Bernardi JA, Sampaio I, Schneider H, et al. Hybridization and  
 29 405 massive mtDNA unidirectional introgression between the closely related Neotropical toads  
 30 406 *Rhinella marina* and *R. schneideri* inferred from mtDNA and nuclear markers. *BMC*  
 31 407 *evolutionary biology*. 2011;11 1:264.
- 32 408 8. Rollins LA, Richardson MF and Shine R. A genetic perspective on rapid evolution in cane  
 33 409 toads (*Rhinella marina*). *Molecular Ecology*. 2015;24 9:2264-76.
- 34 410 9. Estoup A, Baird SJ, Ray N, Currat M, CORNUET J, Santos F, et al. Combining genetic,  
 35 411 historical and geographical data to reconstruct the dynamics of bioinvasions: application to the  
 36 412 cane toad *Bufo marinus*. *Molecular ecology resources*. 2010;10 5:886-901.
- 37 413 10. Trumbo DR, Epstein B, Hohenlohe PA, Alford RA, Schwarzkopf L and Storfer A. Mixed  
 38 414 population genomics support for the central marginal hypothesis across the invasive range of  
 39 415 the cane toad (*Rhinella marina*) in Australia. *Molecular ecology*. 2016;25 17:4161-76.
- 40 416 11. Leblois R, Rousset F, Tikel D, Moritz C and Estoup A. Absence of evidence for isolation by  
 41 417 distance in an expanding cane toad (*Bufo marinus*) population: an individual-based analysis of  
 42 418 microsatellite genotypes. *Molecular Ecology*. 2000;9 11:1905-9.
- 43 419 12. Bozzoni I and Beccari E. Clustered and interspersed repetitive DNA sequences in four  
 44 420 amphibian species with different genome size. *Biochimica et Biophysica Acta (BBA)-Nucleic*  
 45 421 *Acids and Protein Synthesis*. 1978;520 2:245-52.
- 46 422 13. Olmo E. Genome variations in the transition from amphibians to reptiles. *Journal of molecular*  
 47 423 *evolution*. 1991;33 1:68-75.
- 48 424 14. Hammond SA, Warren RL, Vandervalk BP, Kucuk E, Khan H, Gibb EA, et al. The North  
 49 425 American bullfrog draft genome provides insight into hormonal regulation of long noncoding  
 50 426 RNA. *Nature Communications*. 2017;8 1:1433.
- 51 427 15. Sun Y-B, Xiong Z-J, Xiang X-Y, Liu S-P, Zhou W-W, Tu X-L, et al. Whole-genome sequence  
 52 428 of the Tibetan frog *Nanorana parkeri* and the comparative evolution of tetrapod genomes.  
 53 429 *Proceedings of the National Academy of Sciences*. 2015;112 11:E1257-E62.
- 54 430 16. Hellsten U, Harland RM, Gilchrist MJ, Hendrix D, Jurka J, Kapitonov V, et al. The genome of  
 55 431 the Western clawed frog *Xenopus tropicalis*. *Science*. 2010;328 5978:633-6.

- 432 17. Session AM, Uno Y, Kwon T, Chapman JA, Toyoda A, Takahashi S, et al. Genome evolution  
1 433 in the allotetraploid frog *Xenopus laevis*. *Nature*. 2016;538 7625:336.
- 2 434 18. Richardson MF, Sequeira F, Selechnik D, Carneiro M, Vallinoto M, Reid JG, et al. Improving  
3 435 amphibian genomic resources: a multi-tissue reference transcriptome of an iconic invader.  
4 436 *GigaScience*. 2017;7 1:1-7.
- 5 437 19. Andrews S. *FastQC*: a quality control tool for high throughput sequence data. 2010.
- 6 438 20. Bolger AM, Lohse M and Usadel B. *Trimmomatic*: a flexible trimmer for Illumina sequence  
7 439 data. *Bioinformatics*. 2014;30 15:2114-20.
- 8 440 21. Simpson JT, Wong K, Jackman SD, Schein JE, Jones SJ and Birol I. *ABYSS*: a parallel  
9 441 assembler for short read sequence data. *Genome research*. 2009;19 6:1117-23.
- 10 442 22. Ye C, Hill CM, Wu S, Ruan J and Ma ZS. *DBG2OLC*: efficient assembly of large genomes  
11 443 using long erroneous reads of the third generation sequencing technologies. *Scientific reports*.  
12 444 2016;6:31900.
- 13 445 23. Langmead B and Salzberg SL. Fast gapped-read alignment with *Bowtie 2*. *Nature methods*.  
14 446 2012;9 4:357-9.
- 15 447 24. Li H, Handsaker B, Wysoker A, Fennell T, Ruan J, Homer N, et al. The sequence  
16 448 alignment/map format and *SAMtools*. *Bioinformatics*. 2009;25 16:2078-9.
- 17 449 25. Walker BJ, Abeel T, Shea T, Priest M, Abouelliel A, Sakthikumar S, et al. *Pilon*: an integrated  
18 450 tool for comprehensive microbial variant detection and genome assembly improvement. *PloS*  
19 451 *one*. 2014;9 11:e112963.
- 20 452 26. Vinogradov AE. Genome size and GC-percent in vertebrates as determined by flow cytometry:  
21 453 The triangular relationship. *Cytometry Part A*. 1998;31 2:100-9.
- 22 454 27. Simão FA, Waterhouse RM, Ioannidis P, Kriventseva EV and Zdobnov EM. *BUSCO*:  
23 455 assessing genome assembly and annotation completeness with single-copy orthologs.  
24 456 *Bioinformatics*. 2015;31 19:3210-2.
- 25 457 28. Camacho C, Coulouris G, Avagyan V, Ma N, Papadopoulos J, Bealer K, et al. *BLAST+*:  
26 458 architecture and applications. *BMC bioinformatics*. 2009;10 1:421.
- 27 459 29. Mistry J, Finn RD, Eddy SR, Bateman A and Punta M. Challenges in homology search:  
28 460 *HMMER3* and convergent evolution of coiled-coil regions. *Nucleic acids research*. 2013;41  
29 461 12:e121-e.
- 30 462 30. Keller O, Kollmar M, Stanke M and Waack S. A novel hybrid gene prediction method  
31 463 employing protein multiple sequence alignments. *Bioinformatics*. 2011;27 6:757-63.
- 32 464 31. Rice P, Longden I and Bleasby A. *EMBOSS*: the European molecular biology open software  
33 465 suite. Elsevier *Current Trends*, 2000.
- 34 466 32. Bachmann K. Specific nuclear DNA amounts in toads of the genus *Bufo*. *Chromosoma*.  
35 467 1970;29 3:365-74.
- 36 468 33. Camper J, Ruedas L, Bickham J and Dixon J. The relationship of genome size with  
37 469 developmental rates and reproductive strategies in five families of neotropical bufonoid frogs.  
38 470 *Life Sci Adv*. 1993;12:79-87.
- 39 471 34. Bachmann K. Nuclear DNA and developmental rate in frogs. *Quarterly Journal of the Florida*  
40 472 *Academy of Sciences*. 1972;35 4:225-31.
- 41 473 35. Chipman AD, Khaner O, Haas A and Tchernov E. The evolution of genome size: what can be  
42 474 learned from anuran development? *Journal of Experimental Zoology Part A: Ecological*  
43 475 *Genetics and Physiology*. 2001;291 4:365-74.
- 44 476 36. Griffin C, Scott D and Papworth D. The influence of DNA content and nuclear volume on the  
45 477 frequency of radiation-induced chromosome aberrations in *Bufo* species. *Chromosoma*.  
46 478 1970;30 2:228-49.
- 47 479 37. Goin OB, Goin CJ and Bachmann K. DNA and amphibian life history. *Copeia*. 1968:532-40.
- 48 480 38. MacCulloch RD, Upton DE and Murphy RW. Trends in nuclear DNA content among  
49 481 amphibians and reptiles. *Comparative Biochemistry and Physiology Part B: Biochemistry and*  
50 482 *Molecular Biology*. 1996;113 3:601-5.
- 51 483 39. Marçais G and Kingsford C. A fast, lock-free approach for efficient parallel counting of  
52 484 occurrences of k-mers. *Bioinformatics*. 2011;27 6:764-70.

- 485 40. Vurture GW, Sedlazeck FJ, Nattestad M, Underwood CJ, Fang H, Gurtowski J, et al.  
1 486 GenomeScope: fast reference-free genome profiling from short reads. *Bioinformatics*. 2017;33  
2 487 14:2202-4.
- 3 488 41. Wilhelm J, Pingoud A and Hahn M. Real-time PCR-based method for the estimation of genome  
4 489 sizes. *Nucleic Acids Research*. 2003;31 10:e56-e.
- 5 490 42. Holt C and Yandell M. MAKER2: an annotation pipeline and genome-database management  
6 491 tool for second-generation genome projects. *BMC bioinformatics*. 2011;12 1:491.
- 7 492 43. Slater GSC and Birney E. Automated generation of heuristics for biological sequence  
8 493 comparison. *BMC bioinformatics*. 2005;6 1:31.
- 9 494 44. Smit AFA, Hubley R and Green P. 2013–2015. RepeatMasker Open-4.0. 2013.  
10 495 <http://www.repeatmasker.org/>.
- 11 496 45. Hubley R, Finn RD, Clements J, Eddy SR, Jones TA, Bao W, et al. The Dfam database of  
12 497 repetitive DNA families. *Nucleic acids research*. 2015;44 D1:D81-D9.
- 13 498 46. Smit AFA and Hubley R. 2008–2015. RepeatModeler Open-1.0. 2008.  
14 499 <http://www.repeatmasker.org/>.
- 15 500 47. Korf I. Gene finding in novel genomes. *BMC bioinformatics*. 2004;5 1:59.
- 16 501 48. Apweiler R, Bairoch A, Wu CH, Barker WC, Boeckmann B, Ferro S, et al. UniProt: the  
17 502 Universal Protein knowledgebase. *Nucleic Acids Research*. 2004;32 suppl\_1:D115-D9.  
18 503 doi:10.1093/nar/gkh131.
- 19 504 49. Richardson MF, Sequeira F, Selechnik D, Carneiro M, Vallinoto M, Reid JG, et al. Supporting  
20 505 data for “Improving amphibian genomic resources: a multitissue reference transcriptome of an  
21 506 iconic invader.” *Giga-Science Database* 2017. <http://dx.doi.org/10.5524/100374>.
- 22 507 50. Davey NE, Shields DC and Edwards RJ. SLiMDisc: short, linear motif discovery, correcting  
23 508 for common evolutionary descent. *Nucleic acids research*. 2006;34 12:3546-54.
- 24 509 51. Patro R, Duggal G, Love MI, Irizarry RA and Kingsford C. Salmon provides fast and bias-  
25 510 aware quantification of transcript expression. *Nature methods*. 2017;14 4:417.
- 26 511 52. Altenhoff AM, Boeckmann B, Capella-Gutierrez S, Dalquen DA, DeLuca T, Forslund K, et al.  
27 512 Standardized benchmarking in the quest for orthologs. *Nature methods*. 2016;13 5:425.
- 28 513 53. Lee E, Helt GA, Reese JT, Munoz-Torres MC, Childers CP, Buels RM, et al. Web Apollo: a  
29 514 web-based genomic annotation editing platform. *Genome biology*. 2013;14 8:R93.
- 30 515 54. Davey NE, Edwards RJ and Shields DC. The SLiMDisc server: short, linear motif discovery in  
31 516 proteins. *Nucleic acids research*. 2007;35 suppl\_2:W455-W9.
- 32 517 55. Katoh K and Standley DM. MAFFT multiple sequence alignment software version 7:  
33 518 improvements in performance and usability. *Molecular biology and evolution*. 2013;30 4:772-  
34 519 80.
- 35 520 56. Nguyen L-T, Schmidt HA, von Haeseler A and Minh BQ. IQ-TREE: a fast and effective  
36 521 stochastic algorithm for estimating maximum-likelihood phylogenies. *Molecular biology and*  
37 522 *evolution*. 2014;32 1:268-74.
- 38 523 57. Creevey C and McInerney JO. Clann: investigating phylogenetic information through supertree  
39 524 analyses. *Bioinformatics*. 2004;21 3:390-2.
- 40 525 58. Rambaut A. FigTree v1.4. *Molecular evolution, phylogenetics and epidemiology* Edinburgh,  
41 526 UK: University of Edinburgh, Institute of Evolutionary Biology. 2012.
- 42 527 59. SlimSuite WebApollo search tool. <http://www.slimsuite.unsw.edu.au/servers/apollo.php>.
- 43 528 60. Edwards RJ, Enosi Tuipulotu D, Amos TG, O’Meally D, Richardson MF, Russell TL,  
44 529 Vallinoto M, Carneiro M, Ferrand N, Wilkins MR, Sequeira F, Rollins LA, Holmes EC, Shine  
45 530 R, White PA: Supporting data for "Draft genome assembly of the invasive cane toad, *Rhinella*  
46 531 *marina*" *GigaScience Database*. 2018. <http://dx.doi.org/10.5524/100483>
- 47 532
- 48 533



534 **Tables**

535 **Table 1.** Summary statistics of generated whole genome shotgun sequencing data. Bold rows indicate  
 536 data used for assembly.

| Platform                         | Library Type | Mean insert size (kb) | Mean read length (bp) | Number of reads      | Number of bases (Gb) |
|----------------------------------|--------------|-----------------------|-----------------------|----------------------|----------------------|
| HiSeqX (raw)                     | Paired-end   | 0.35                  | 147.7                 | 1,857,762,090        | 282.92               |
| <b>HiSeqX (filtered)</b>         |              |                       | <b>140.6</b>          | <b>1,205,616,705</b> | <b>169.47</b>        |
| PacBio RS II                     | SMRTbell     | 15-50                 | 8,852                 | 2,794,391            | 24.736               |
| PacBio RS II                     | SMRTbell     | 15-50                 | 9,085                 | 595,447              | 5.409                |
| PacBio RS II                     | SMRTbell     | 15-50                 | 10,432                | 1,867,543            | 19.482               |
| PacBio RS II                     | SMRTbell     | 20-50                 | 10,834                | 2,487,852            | 26.952               |
| <b>PacBio Total</b>              |              |                       | <b>9,887</b>          | <b>7,745,233</b>     | <b>76.58</b>         |
| <b>PacBio Unique<sup>1</sup></b> |              |                       | <b>10,987</b>         | <b>6,167,714</b>     | <b>67.77</b>         |

537 1. Longest read per sequenced molecule (SMRT ZMW).

538

539

540

541

542

543

544

545

546

547

548 **Table 2.** Summary of genome assemblies. For comparison, statistics are provided for two existing  
 549 neobatrachian genomes, *Nanorana parkeri* (v2) [15] and *Lithobates catesbeianus* (v2.1)[14], and two  
 550 anuran reference genomes, *Xenopus tropicalis* (v9.1) [16] and *Xenopus laevis* (v9.2) [17]. Lengths are  
 551 given to 3 s.f. All percentages are given to 1 d.p.

| Genome Assembly          | Hybrid (v2.2) | Short read | Long read | <i>N. parkeri</i> (v2.0) | <i>L. catesbeianus</i> (v2.1) | <i>X. tropicalis</i> (v9.1) | <i>X. laevis</i> (v9.2) |
|--------------------------|---------------|------------|-----------|--------------------------|-------------------------------|-----------------------------|-------------------------|
| Total Length (Gb)        | 2.55          | 3.75       | 2.69      | 2.07                     | 6.25                          | 1.44                        | 2.72                    |
| No. scaffolds            | 31,392        | 19.9 M*    | 31,392*   | 135,808                  | 1.54 M                        | 6,822                       | 108,033                 |
| Proportion gap (%N)      | 0.0%          | 0.1%       | 0.0%      | 3.9%                     | 11.6%                         | 4.9%                        | 11.4%                   |
| N50                      | 168 kb        | 583 bp     | 167 kb    | 1.06 Mb                  | 39.4 kb                       | 135 Mb                      | 137 Mb                  |
| L50                      | 3,373         | 715 k      | 3,531     | 555                      | 31,248                        | 5                           | 9                       |
| Longest scaffold         | 3.53 Mb       | 72.6 kb    | 3.64 Mb   | 8.61 Mb                  | 1.38 Mb                       | 195 Mb                      | 220 Mb                  |
| GC                       | 43.2%         | 43.3%      | 42.9%     | 42.6%                    | 43.1%                         | 40.1%                       | 39.0%                   |
| <b>BUSCO<sup>1</sup></b> |               |            |           |                          |                               |                             |                         |
| Complete Single copy     | 80.9%         | 15.5%      | 2.2%      | 83.4%                    | 42.3%                         | 87.5%                       | 52.9%                   |
| Complete Duplicate       | 2.2%          | 0.7%       | 0.0%      | 1.6%                     | 0.9%                          | 1.0%                        | 39.8%                   |
| Fragment                 | 7.5%          | 33.6%      | 2.2%      | 7.2%                     | 22.3%                         | 6.0%                        | 3.2%                    |

552 1. BUSCO v2.0.1 short summary statistics (n=3950).

553 \* Statistics for short and long read assemblies refer to contigs used for hybrid assembly.

554

555 **Table 3.** GenomeScope genome size estimates for *Rhinella marina* based on raw trimmed Illumina data  
 556 using different combinations of k and maximum k-mer coverage. Lengths are in megabases (0 d.p.).

| Data       | Max<br>kmer<br>coverage | Unique Length<br>(Mb) |       | Repeat Length<br>(Mb) |     | Genome Size (Mb) |       |
|------------|-------------------------|-----------------------|-------|-----------------------|-----|------------------|-------|
|            |                         | Min                   | Max   | Min                   | Max | Min              | Max   |
| Raw (k=21) | 1000                    | 1,365                 | 1,366 | 489                   | 489 | 1,853            | 1,855 |
| Raw (k=21) | 10000                   | 1,365                 | 1,365 | 874                   | 874 | 2,239            | 2,240 |
| Raw (k=23) | 1000                    | 1,453                 | 1,455 | 470                   | 471 | 1,924            | 1,926 |
| Raw (k=23) | 10000                   | 1,454                 | 1,454 | 842                   | 842 | 2,296            | 2,296 |
| Q30 (k=21) | 1000                    | 1,307                 | 1,308 | 462                   | 462 | 1,768            | 1,771 |
| Q30 (k=21) | 10000                   | 1,307                 | 1,308 | 749                   | 749 | 2,056            | 2,057 |
| Q30 (k=23) | 1000                    | 1,389                 | 1,391 | 438                   | 439 | 1,828            | 1,830 |
| Q30 (k=23) | 10000                   | 1,390                 | 1,391 | 713                   | 713 | 2,103            | 2,104 |

557

558

559

560

561

562

563

564

565

566

567 **Table 4.** Estimation of *Rhinella marina* genome size using various methods and the corresponding level  
 568 of sequencing coverage (3 s.f.). GenomeScope values in this table are mean values from the four setting  
 569 combinations.

| Method                | Estimated Genome Size (Gb) | Illumina coverage (X) | PacBio coverage (X) | Reference        |
|-----------------------|----------------------------|-----------------------|---------------------|------------------|
| Flow cytometry (mean) | 4.33                       | 65.3                  | 17.7                | [26, 33, 35, 38] |
| Flow cytometry (min)  | 3.98                       | 71.1                  | 19.2                | [38]             |
| Flow cytometry (max)  | 4.90                       | 57.7                  | 15.6                | [35]             |
| Densitometry (mean)   | 4.95                       | 57.1                  | 15.5                | [32, 34, 36, 37] |
| Densitometry (min)    | 4.06 <sup>#</sup>          | 69.7                  | 18.9                | [37]             |
| Densitometry (max)    | 5.65                       | 50.1                  | 13.6                | [32]             |
| GenomeScope (raw)     | 2.08                       | 136                   | 36.8                | -                |
| GenomeScope (Q30)     | 1.94                       | 146                   | 39.4                | -                |
| qPCR (zfp292)         | 2.38                       | 119                   | 32.1                | -                |
| Assembly (v2.2)       | 2.55                       | 111                   | 30.0                | -                |

570 # value adjusted to account for updated size of reference genome used to infer *R. marina* genome size.

579 **Table 5.** Summary statistics of consensus protein-coding gene predictions and predicted repeat  
 580 elements (including RNA genes) for the *Rhinella marina* v2.2 draft genome. Lengths are given to 3 s.f.  
 581 Coverage and mean depth statistics for PacBio and Q30-trimmed Illumina reads are given to 2 d.p.

| Element             | Count     | No. scaffolds | Avg. length | Total length | Genome coverage | PacBio depth (X) | Illumina depth (X) |
|---------------------|-----------|---------------|-------------|--------------|-----------------|------------------|--------------------|
| Protein-coding gene | 58,302    | 19,530        | 18.8 kb     | 1.10 Gb      | 42.91%          | 20.32            | 58.07              |
| Transcript          | 58,302    | 19,530        | 1.24 kb     | 72.3 Mb      | 2.83%           | 20.49            | 65.41              |
| - Similar to known  | 25,846    | 11,918        | 1.90 kb     | 49.1 Mb      | 1.92%           | 20.08            | 56.42              |
| - Unknown           | 32,456    | 15,213        | 714 bp      | 23.2 Mb      | 0.91%           | 20.98            | 68.82              |
| Exon                | 309,718   | 19,530        | 233 bp      | 72.3 Mb      | 2.83%           | 20.49            | 65.41              |
| - Coding            | 294,535   | 19,530        | 207 bp      | 60.8 Mb      | 2.38%           | 20.67            | 66.97              |
| Intron              | 251,416   | 18,509        | 4.08 kb     | 1.03 Gb      | 40.09%          | 20.30            | 57.55              |
| 5' UTR              | 15,855    | 8,839         | 208 bp      | 3.29 Mb      | 0.13%           | 18.69            | 53.86              |
| CDS                 | 58,302    | 19,530        | 1.04 kb     | 60.8 Mb      | 2.38%           | 20.67            | 66.97              |
| 3' UTR              | 11,965    | 5,780         | 682 bp      | 8.16 Mb      | 0.32%           | 19.91            | 58.52              |
| BUSCO SC Complete   | 3,194     | 2,014         | 32.6 kb     | 104 Mb       | 4.07%           | 19.89            | 53.01              |
| <b>Repeats</b>      |           |               |             |              |                 |                  |                    |
| SINE                | 21,620    | 9,322         | 338 bp      | 7.31 Mb      | 0.29%           | 19.45            | 58.23              |
| LINE                | 268,569   | 27,620        | 513 bp      | 138 Mb       | 5.38%           | 21.03            | 72.29              |
| LTR                 | 201,817   | 24,949        | 504 bp      | 102 Mb       | 3.98%           | 22.62            | 68.96              |
| DNA                 | 817,405   | 30,689        | 600 bp      | 490 Mb       | 19.17%          | 21.67            | 68.37              |
| Helitron            | 20,319    | 9,340         | 826 bp      | 16.8 Mb      | 0.66%           | 19.32            | 56.81              |
| Retroposon          | 1,042     | 829           | 549 bp      | 570 kb       | 0.02%           | 18.22            | 50.87              |
| Other               | 18        | 17            | 209 bp      | 3.7 kb       | 0.00%           | 14.27            | 24.60              |
| Unknown             | 1,610,883 | 30,966        | 513 bp      | 826 Mb       | 32.28%          | 20.12            | 59.39              |
| Satellite           | 25,557    | 10,270        | 440 bp      | 11.3 Mb      | 0.44%           | 18.38            | 54.21              |
| Simple repeats      | 968,947   | 30,620        | 56.9 bp     | 55.1 Mb      | 2.16%           | 18.88            | 48.51              |
| Low complexity      | 141,028   | 24,020        | 51.8 bp     | 7.30 Mb      | 0.29%           | 22.48            | 64.48              |
| rRNA                | 5,227     | 2,923         | 422 bp      | 2.20 Mb      | 0.09%           | 40.88            | 142.42             |
| tRNA                | 5,558     | 4,474         | 105 bp      | 583 kb       | 0.02%           | 29.15            | 140.06             |
| snRNA               | 21,788    | 9,432         | 546 bp      | 11.9 Mb      | 0.47%           | 24.63            | 89.12              |

|   |                          |           |        |         |         |       |       |        |
|---|--------------------------|-----------|--------|---------|---------|-------|-------|--------|
| 1 | srpRNA                   | 17        | 11     | 268 bp  | 4.55 kb | 0.00% | 22.11 | 140.44 |
| 2 | scRNA                    | 3         | 3      | 69.0 bp | 207 bp  | 0.00% | 15.53 | 47.29  |
| 3 | RNA                      | 418       | 266    | 482 bp  | 202 kb  | 0.01% | 32.65 | 173.99 |
| 4 |                          |           |        |         |         |       |       |        |
| 5 | <b>Repeat</b>            |           |        |         |         |       |       |        |
| 6 | <b>TOTAL<sup>1</sup></b> | 4,110,222 | 31,179 | 406 bp  | 1.63 Gb | 63.9% | 20.82 | 63.79  |

1. Values for repeat totals account for overlapping repeats.

7 582  
8  
9  
10  
11 583  
12  
13  
14 584  
15  
16  
17 585  
18  
19  
20 586  
21  
22  
23 587  
24  
25  
26 588  
27  
28  
29 589  
30  
31  
32 590  
33  
34  
35  
36 591  
37  
38  
39 592  
40  
41 593  
42  
43  
44 594  
45  
46 595  
47  
48 596  
49  
50  
51 597  
52  
53 598  
54  
55  
56 599  
57  
58 600  
59  
60  
61  
62  
63  
64  
65

601 **Table 6.** Proportions of predicted protein and transcript sequences exceeding 50%, 80%, 95% or 99%  
 602 coverage in the top BLAST+ hit from the published transcriptome [18], and combined coverage for the  
 603 top ten transcript hits. All percentages given to 3 s.f.

| Type                                | Count  | Coverage in top transcript hit |      |      |      | Coverage in top 10 transcript hits |      |      |      |
|-------------------------------------|--------|--------------------------------|------|------|------|------------------------------------|------|------|------|
|                                     |        | 50%+                           | 80%+ | 95%+ | 99%+ | 50%+                               | 80%+ | 95%+ | 99%+ |
| Protein<br>(similar to<br>known)    | 25,846 | 93.6                           | 76.7 | 56.5 | 40.7 | 97.5                               | 90.3 | 72.7 | 54.2 |
| Transcript<br>(similar to<br>known) | 25,846 | 75.0                           | 50.0 | 30.8 | 21.4 | 82.6                               | 73.1 | 57.2 | 40.9 |
| Protein<br>(unknown)                | 32,456 | 79.9                           | 49.8 | 27.1 | 15.8 | 85.7                               | 66.3 | 44.4 | 29.9 |
| Transcript<br>(unknown)             | 32,456 | 43.6                           | 21.5 | 12.1 | 8.61 | 52.6                               | 37.3 | 25.4 | 19.1 |

604

605

606

607

608

609

610

611

612

613

614

## 615 **Figure legends**

1  
2  
3 616 **Figure 1. *Rhinella marina*.** An adult cane toad.

4  
5  
6 617 **Figure 2. Schematic overview of project workflow.** A summary of the experimental methods used  
7  
8 618 for sequencing, assembly, annotation and size estimation of the cane toad genome. Transcriptome data  
9  
10 619 (orange segment) was obtained from our previous study [18].

11  
12  
13 620 **Figure 3. Assessment of genome assembly completeness.** BUSCO analysis of *Rhinella marina*  
14  
15 621 genome assembly (v2.0 uncorrected, v2.1 pilon polishing, v2.2 pilon and arrow polishing, combined  
16  
17 622 v2.1, 2.2 and 2.2 ratings), *Lithobates catesbeianus* (v2.1), *Nanorana parkeri* (v2.0), *Xenopus tropicalis*  
18  
19 623 (v9.1) and *Xenopus leavis* (v9.2) genomes using the tetrapoda\_odb9 orthologue set (n=3950). The  
20  
21 624 *Xenopus leavis* genome duplication is made clear by the large number of paralogs (light blue) with  
22  
23 625 respect to other assemblies.

24  
25  
26  
27 626 **Figure 4. GenomeScope k-mer frequency and log-transformed k-mer coverage profiles.** (A) raw  
28  
29 627 Illumina data (k=23), (B) Q30 trimmed Illumina data (k=23). Profiles for k=21 are similar (data not  
30  
31 628 shown).

32  
33  
34  
35 629 **Figure 5. Key protein statistics for predicted genes with and without annotated similarity to**  
36  
37 630 **known genes.** Histograms of (A) protein length, and (B) MAKER2 Annotation Edit Distance (AED),  
38  
39 631 for “similar” (blue) and “unknown” (red) classes of predicted genes.

40  
41  
42  
43 632 **Figure 6. Multi-tissue gene expression for predicted genes with and without annotated similarity**  
44  
45 633 **to known genes.** (A) Histograms of RNA-Seq TPM for “similar” (blue) and “unknown” (red) classes  
46  
47 634 of predicted genes, capped at 100 TPM. (B) “similar” and (C) “unknown” gene expression, rated as:  
48  
49 635 Very low (<1 TPM), Low (1-9 TPM), Medium (10-99 TPM) or High (100+ TPM).

50  
51  
52  
53 636 **Figure 7. Assessment of assembly annotation completeness.** BUSCO analysis for (A) all BUSCO  
54  
55 637 tetrapoda genes (n=3950), and (B) the subset of BUSCO genes rated as “Missing” from the Richardson  
56  
57 638 *et al.* transcriptome [18]. *R. marina* (combined): combined v2.0, v2.1 and v2.2 ratings; Annotation:



639 combined MAKER proteome and transcriptome ratings; GigaDB: combined assembly and annotation  
1 ratings; Cane Toad: combined assembly, annotation and Richardson *et al.* transcriptome [18].  
2  
3  
4

5 **641 Figure 8. Phylogenetic supertree of 15 selected chordate taxa constructed from phylogenetic trees**  
6  
7 **642 for 6,417 high confidence cane toad proteins.** Branch labels indicate percentage consistency (see  
8  
9 text), rounded down. Numbers following each taxon are the number and percentage of source trees  
10  
11 containing that taxon. The tree has been rooted using fish as an outgroup and visualised with FigTree  
12  
13 [58]. The full supertree of 52 taxa is available as Figure S1.  
14  
15  
16

17 **646 Figure 9. Summary of the main annotation classes for *Rhinella marina* genome assembly.**  
18  
19 **647 Identified repeat classes exceeding 2% of assembly have been plotted separately (1 d.p.).** All other  
20  
21 repeats, including “Unknown”, have been grouped as “Other repeats”. The percentage for introns  
22  
23  
24 **648** excludes any repeat sequences within those introns.  
25  
26  
27 **650**

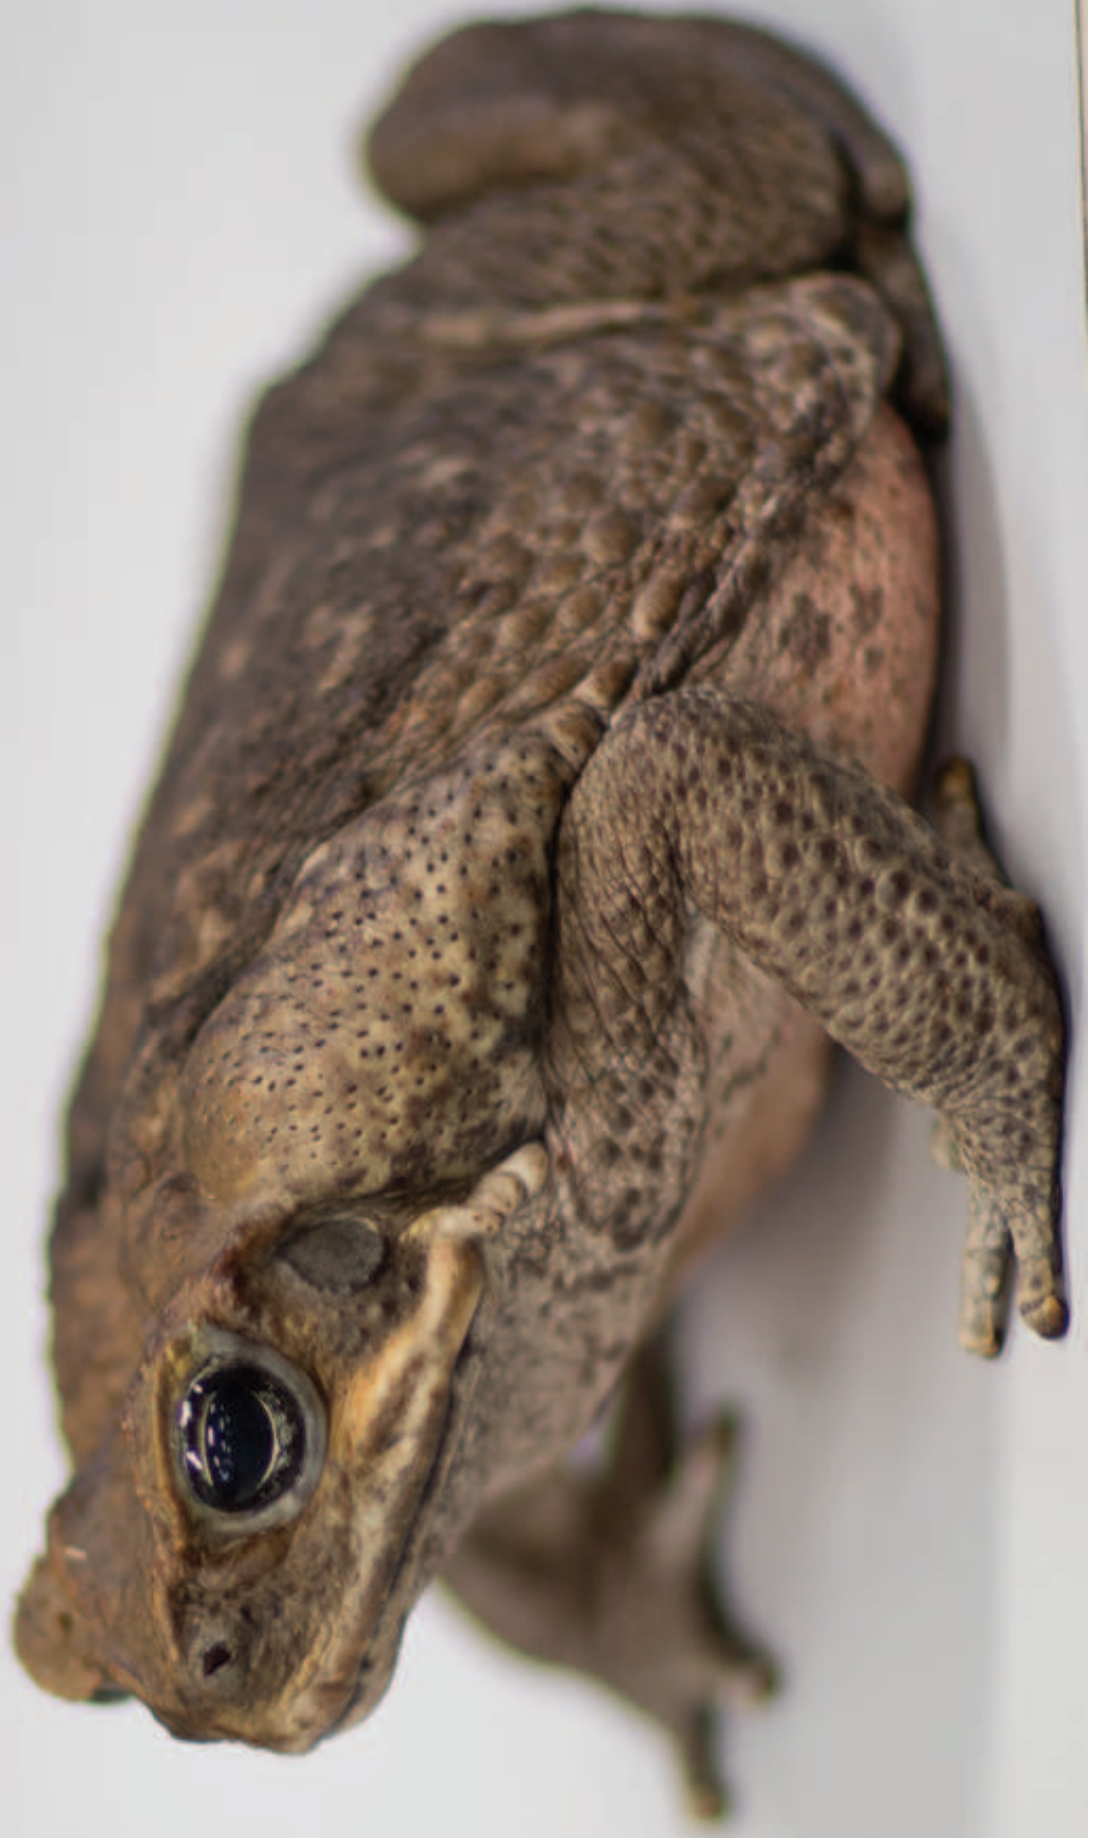

Figure 2

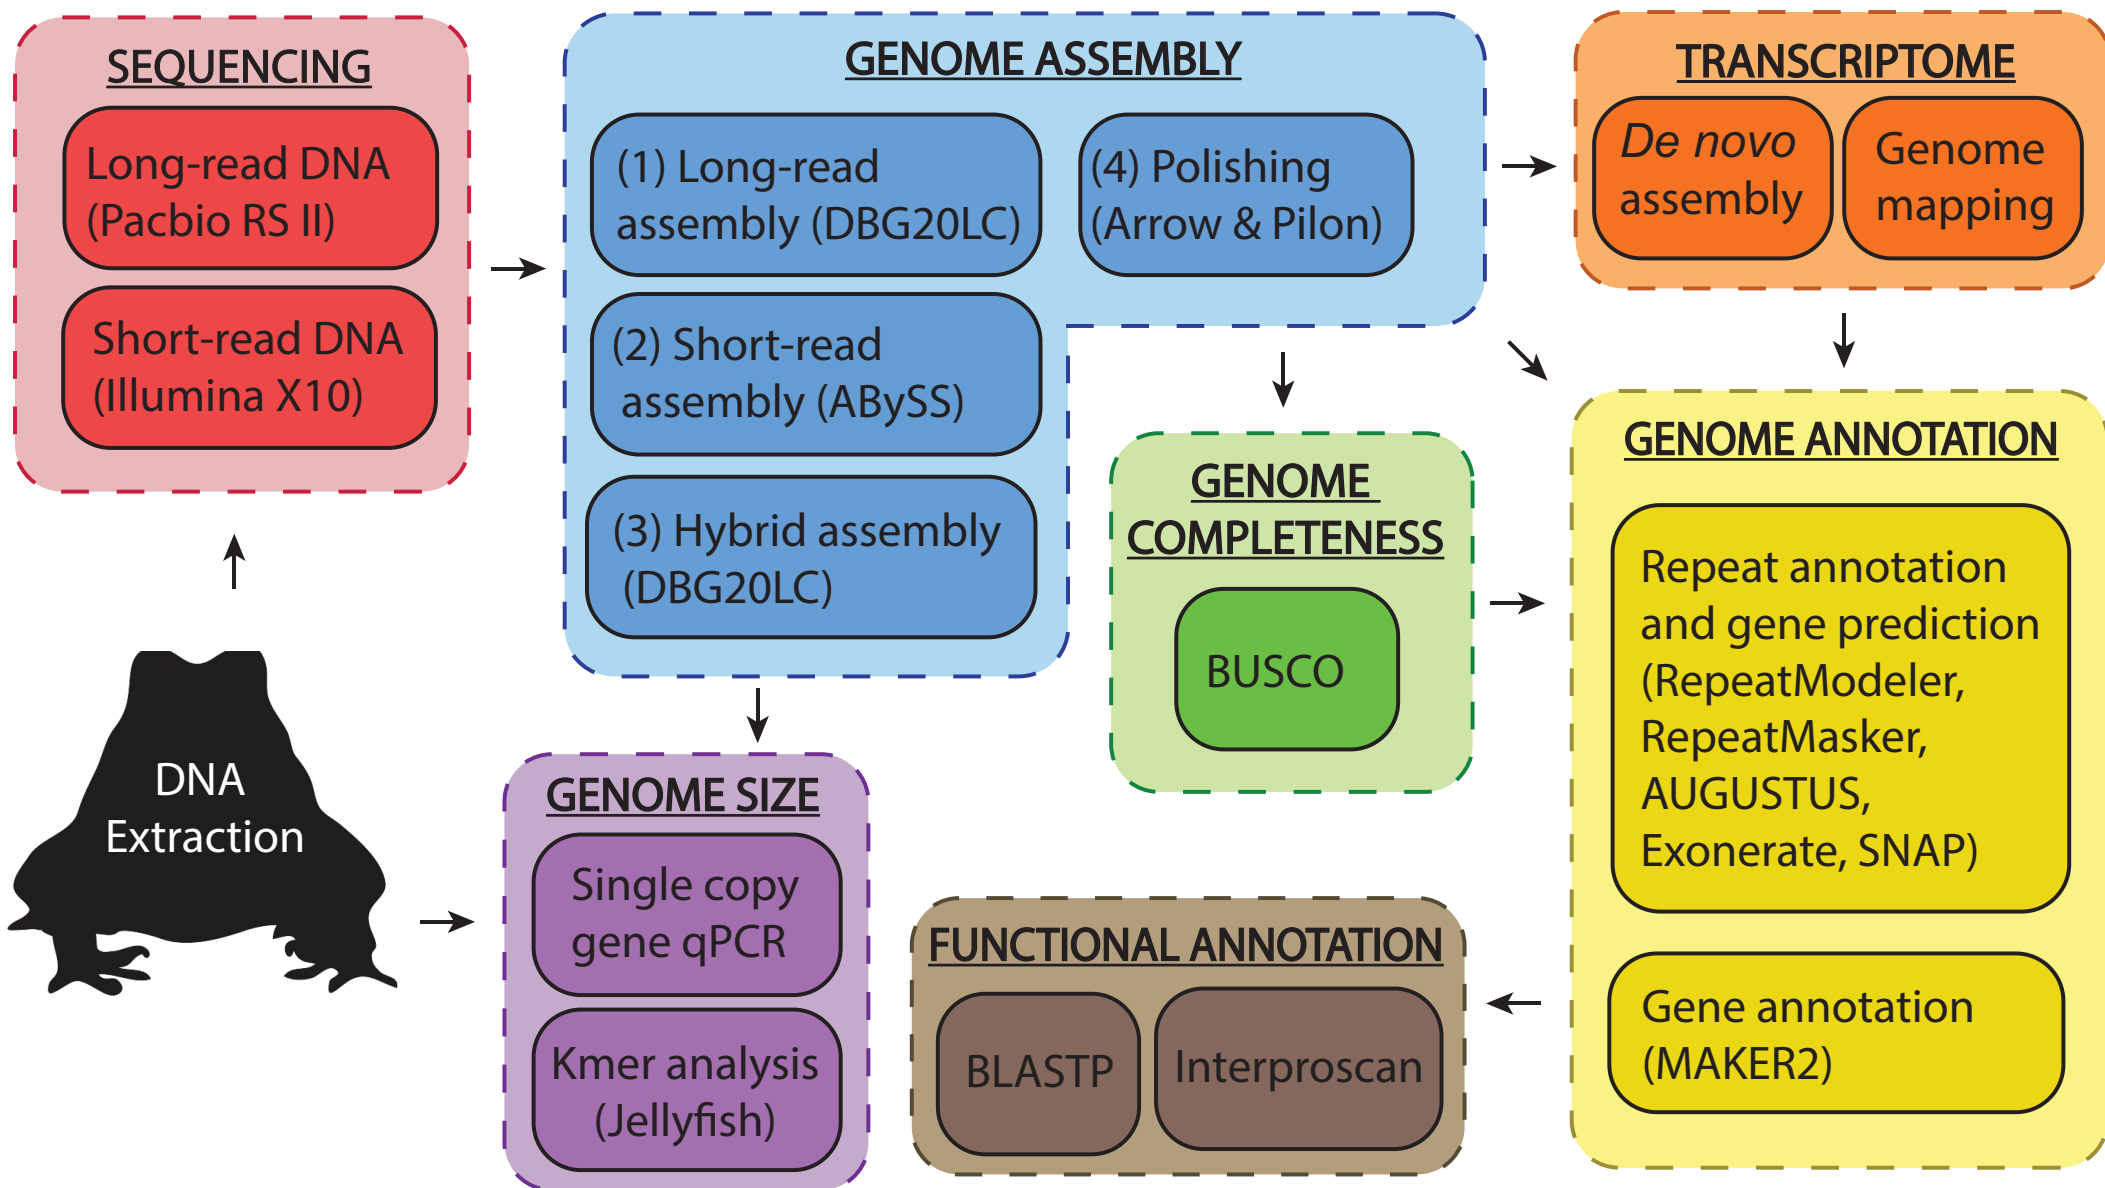

Figure 3

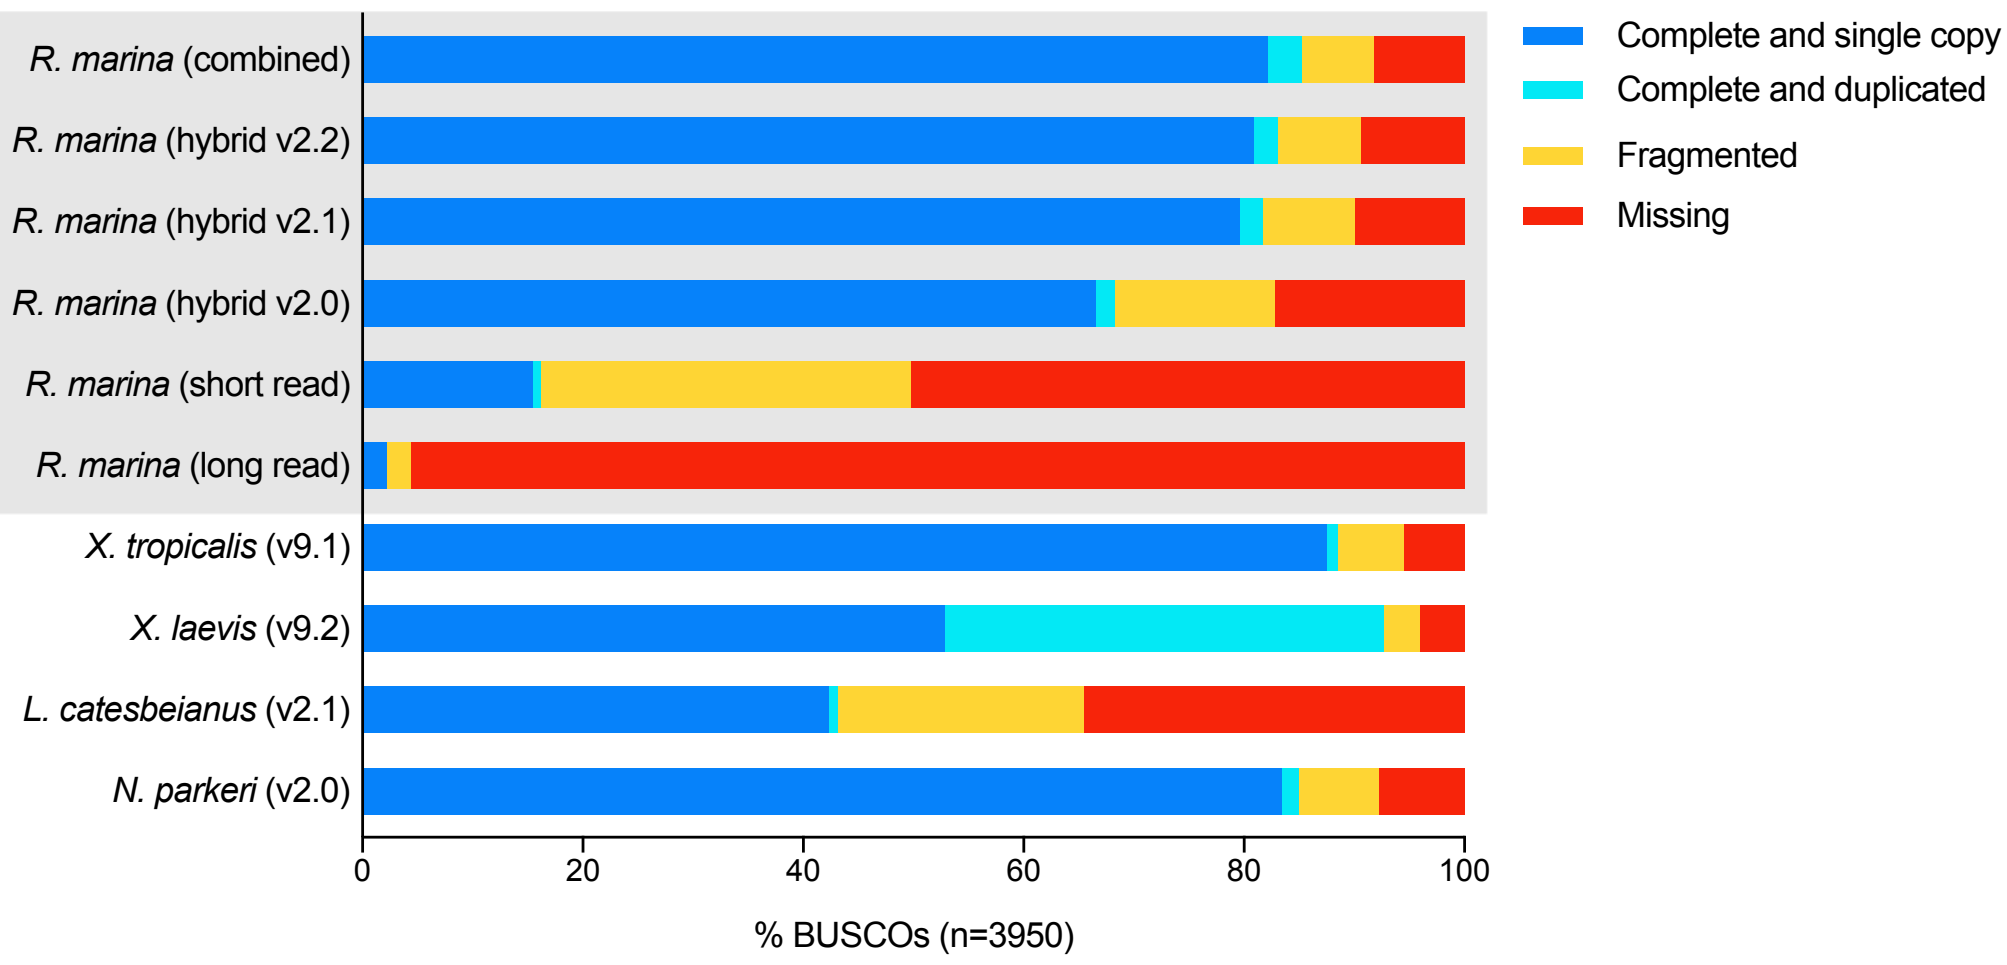

## A. Raw data (k=23)

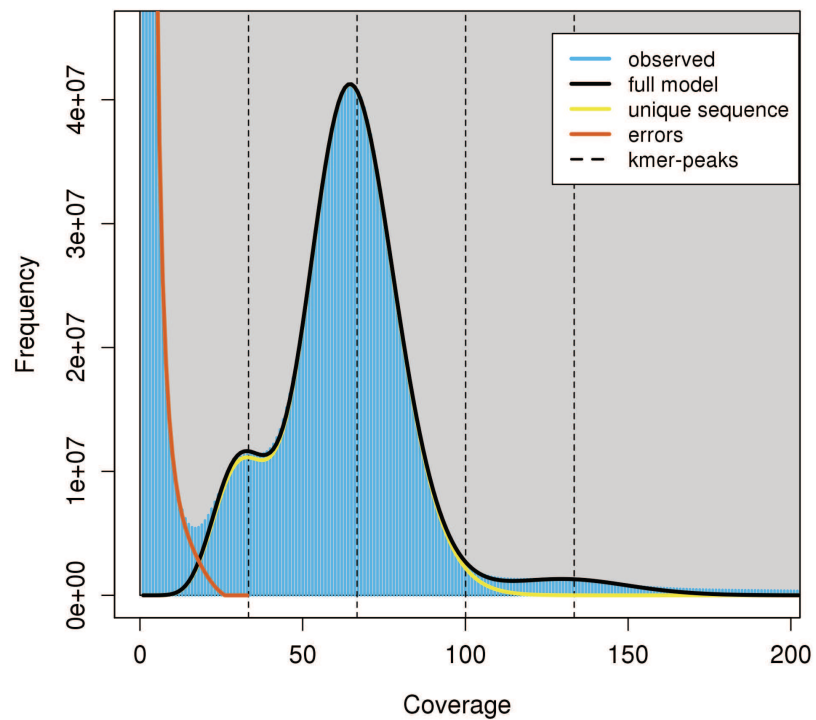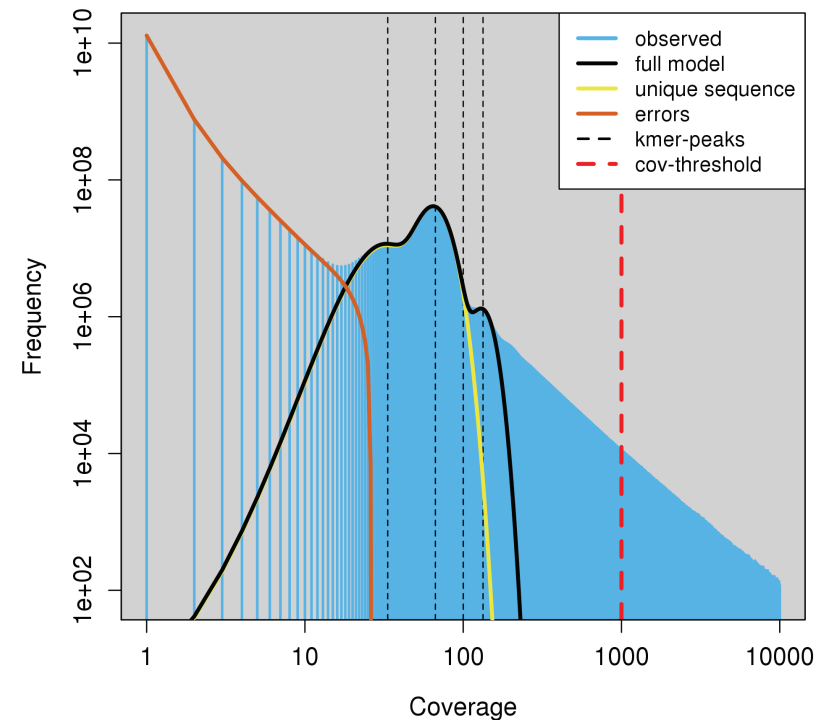

## B. Q30 trimmed data (k=23)

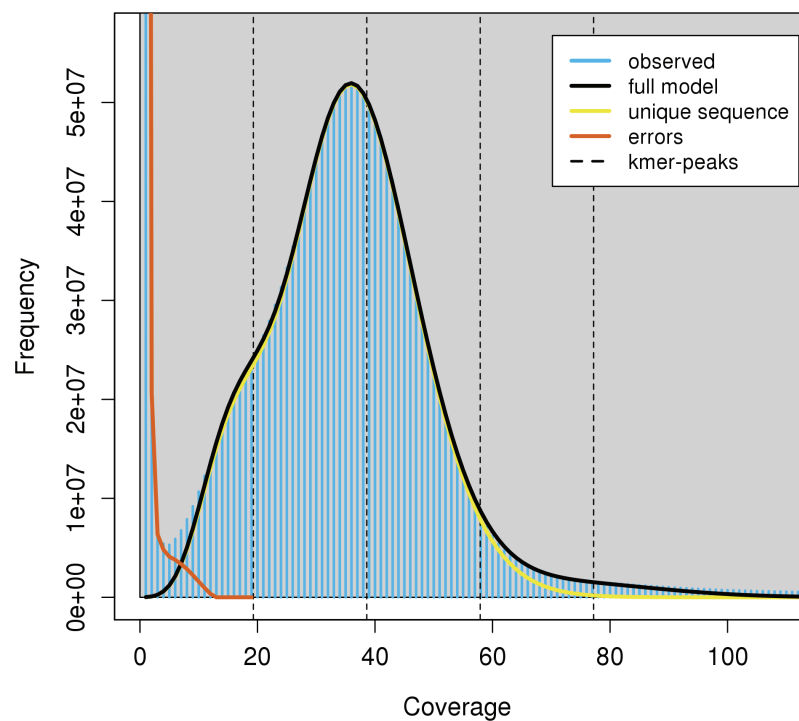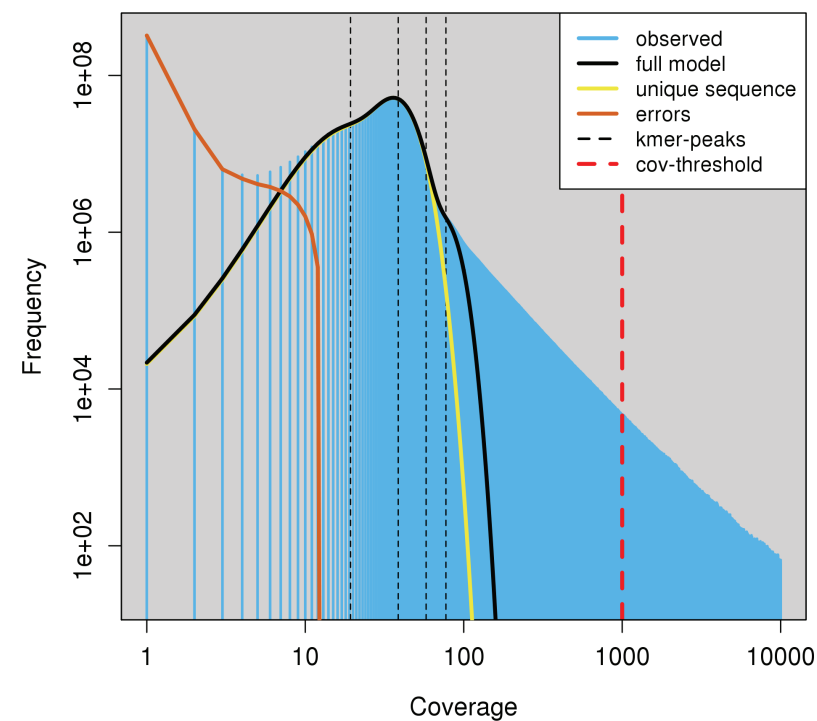

A.

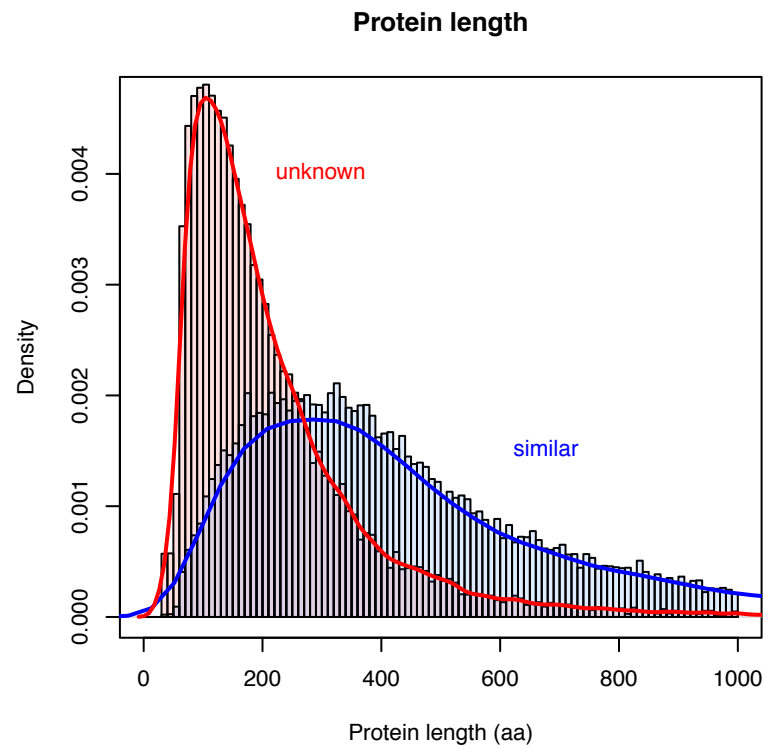

B.

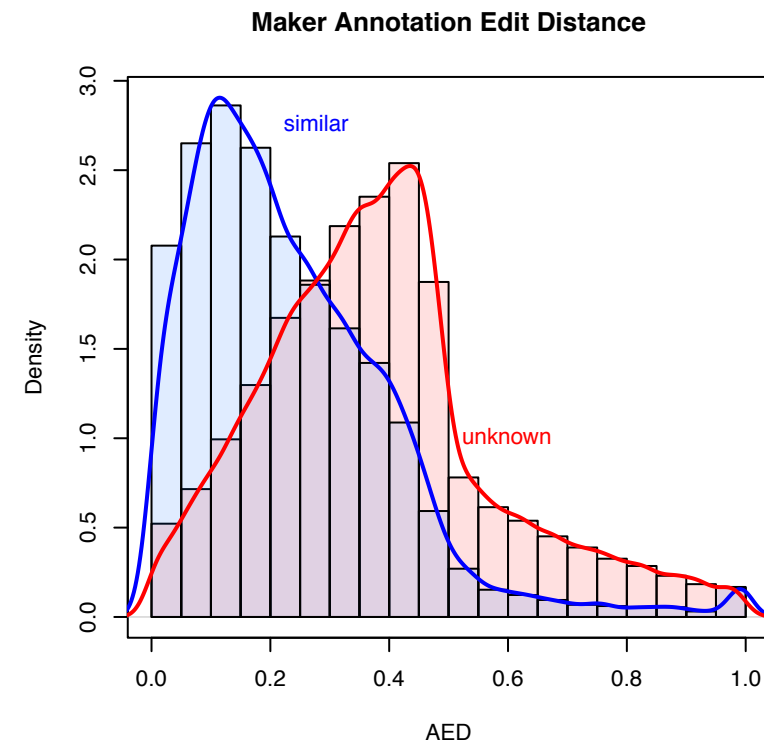

A.

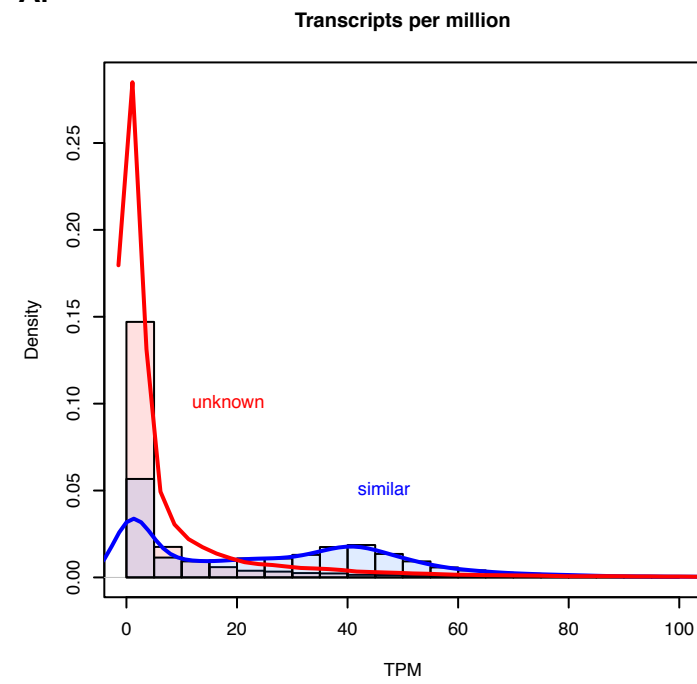

B.

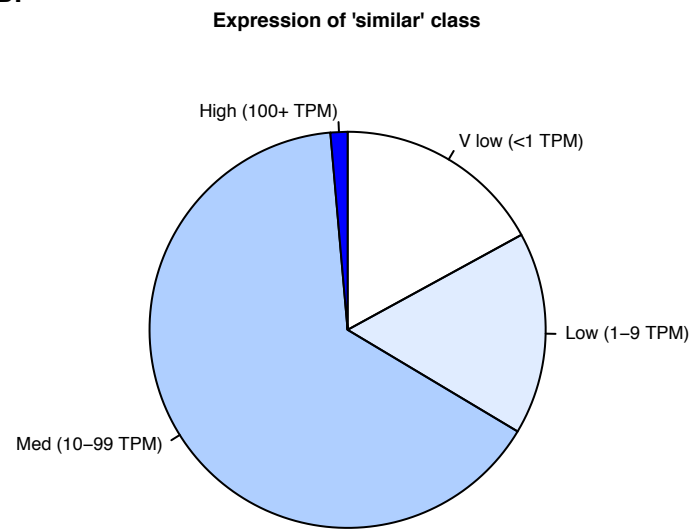

C.

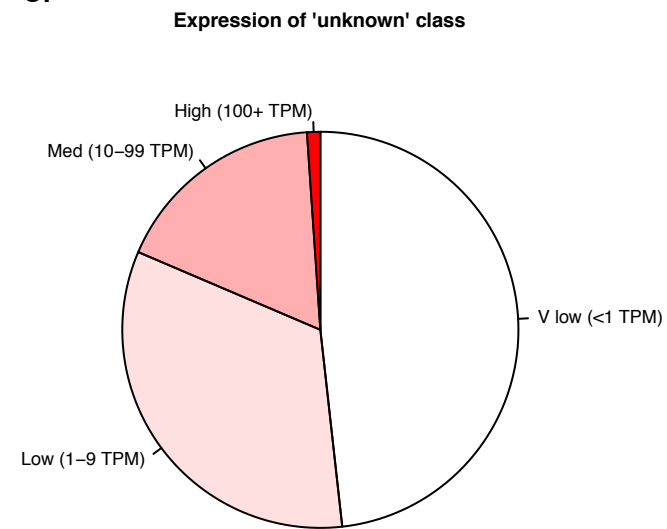

Figure 7

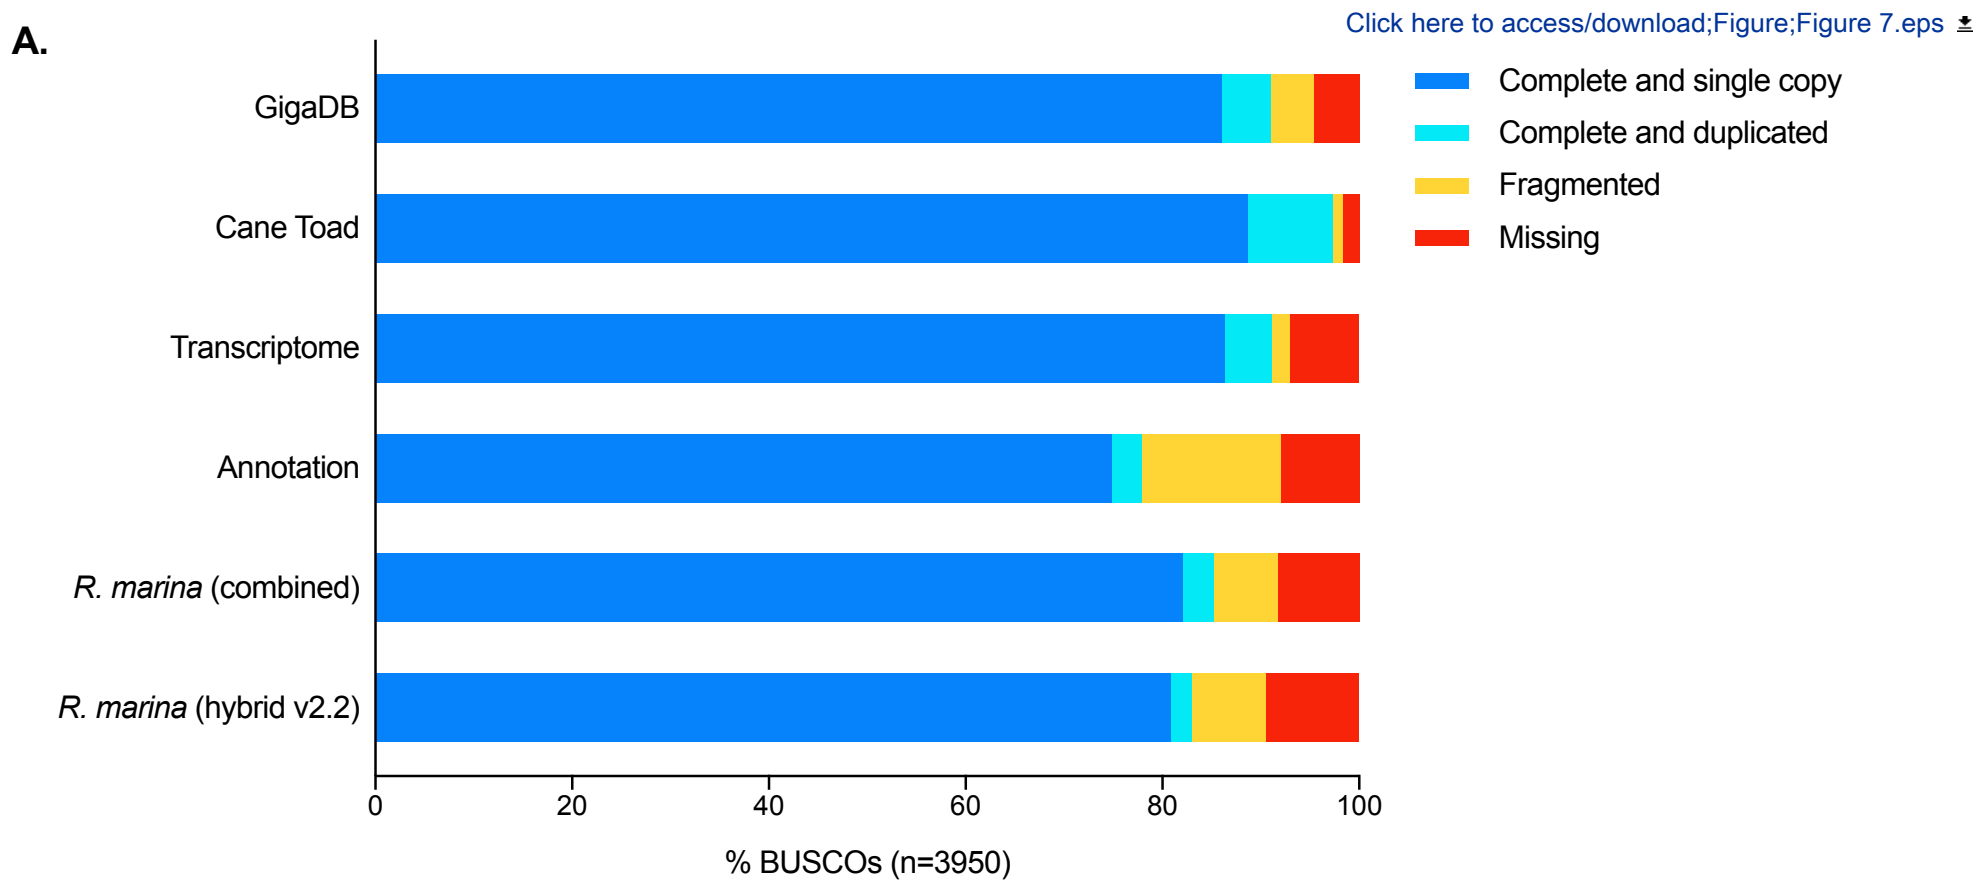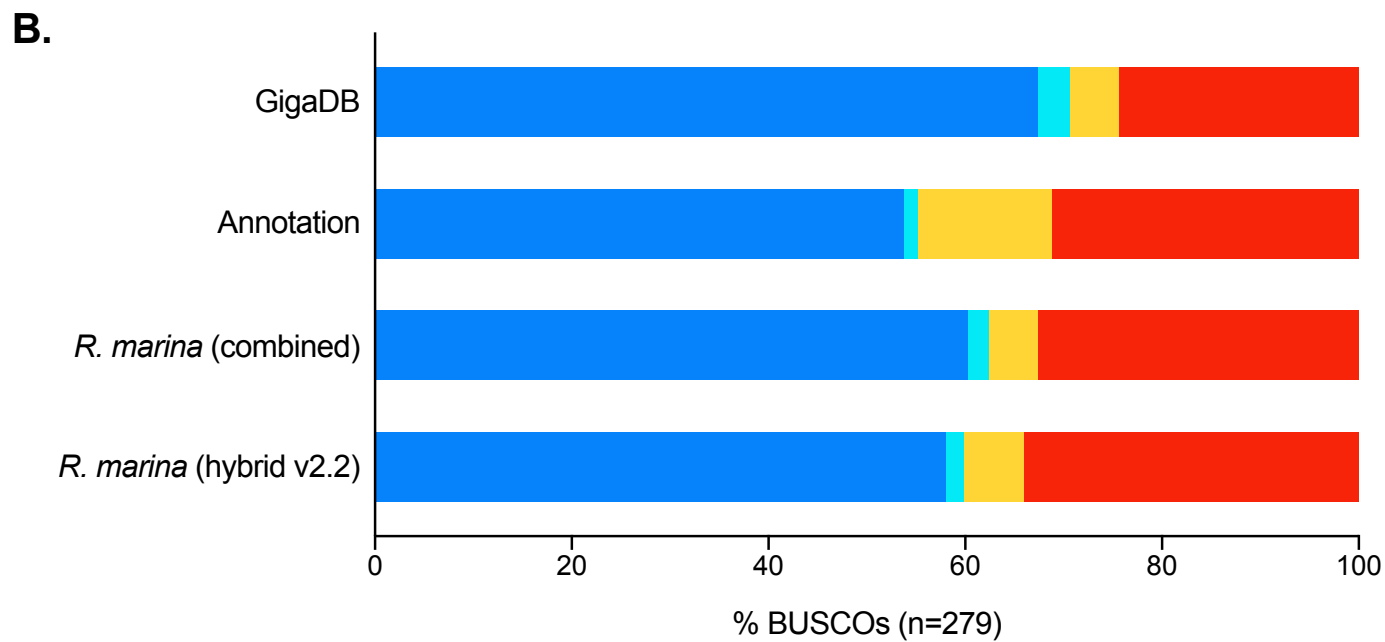



Figure 8

[Click here to access/download;Figure;Figure 8.pdf](#)

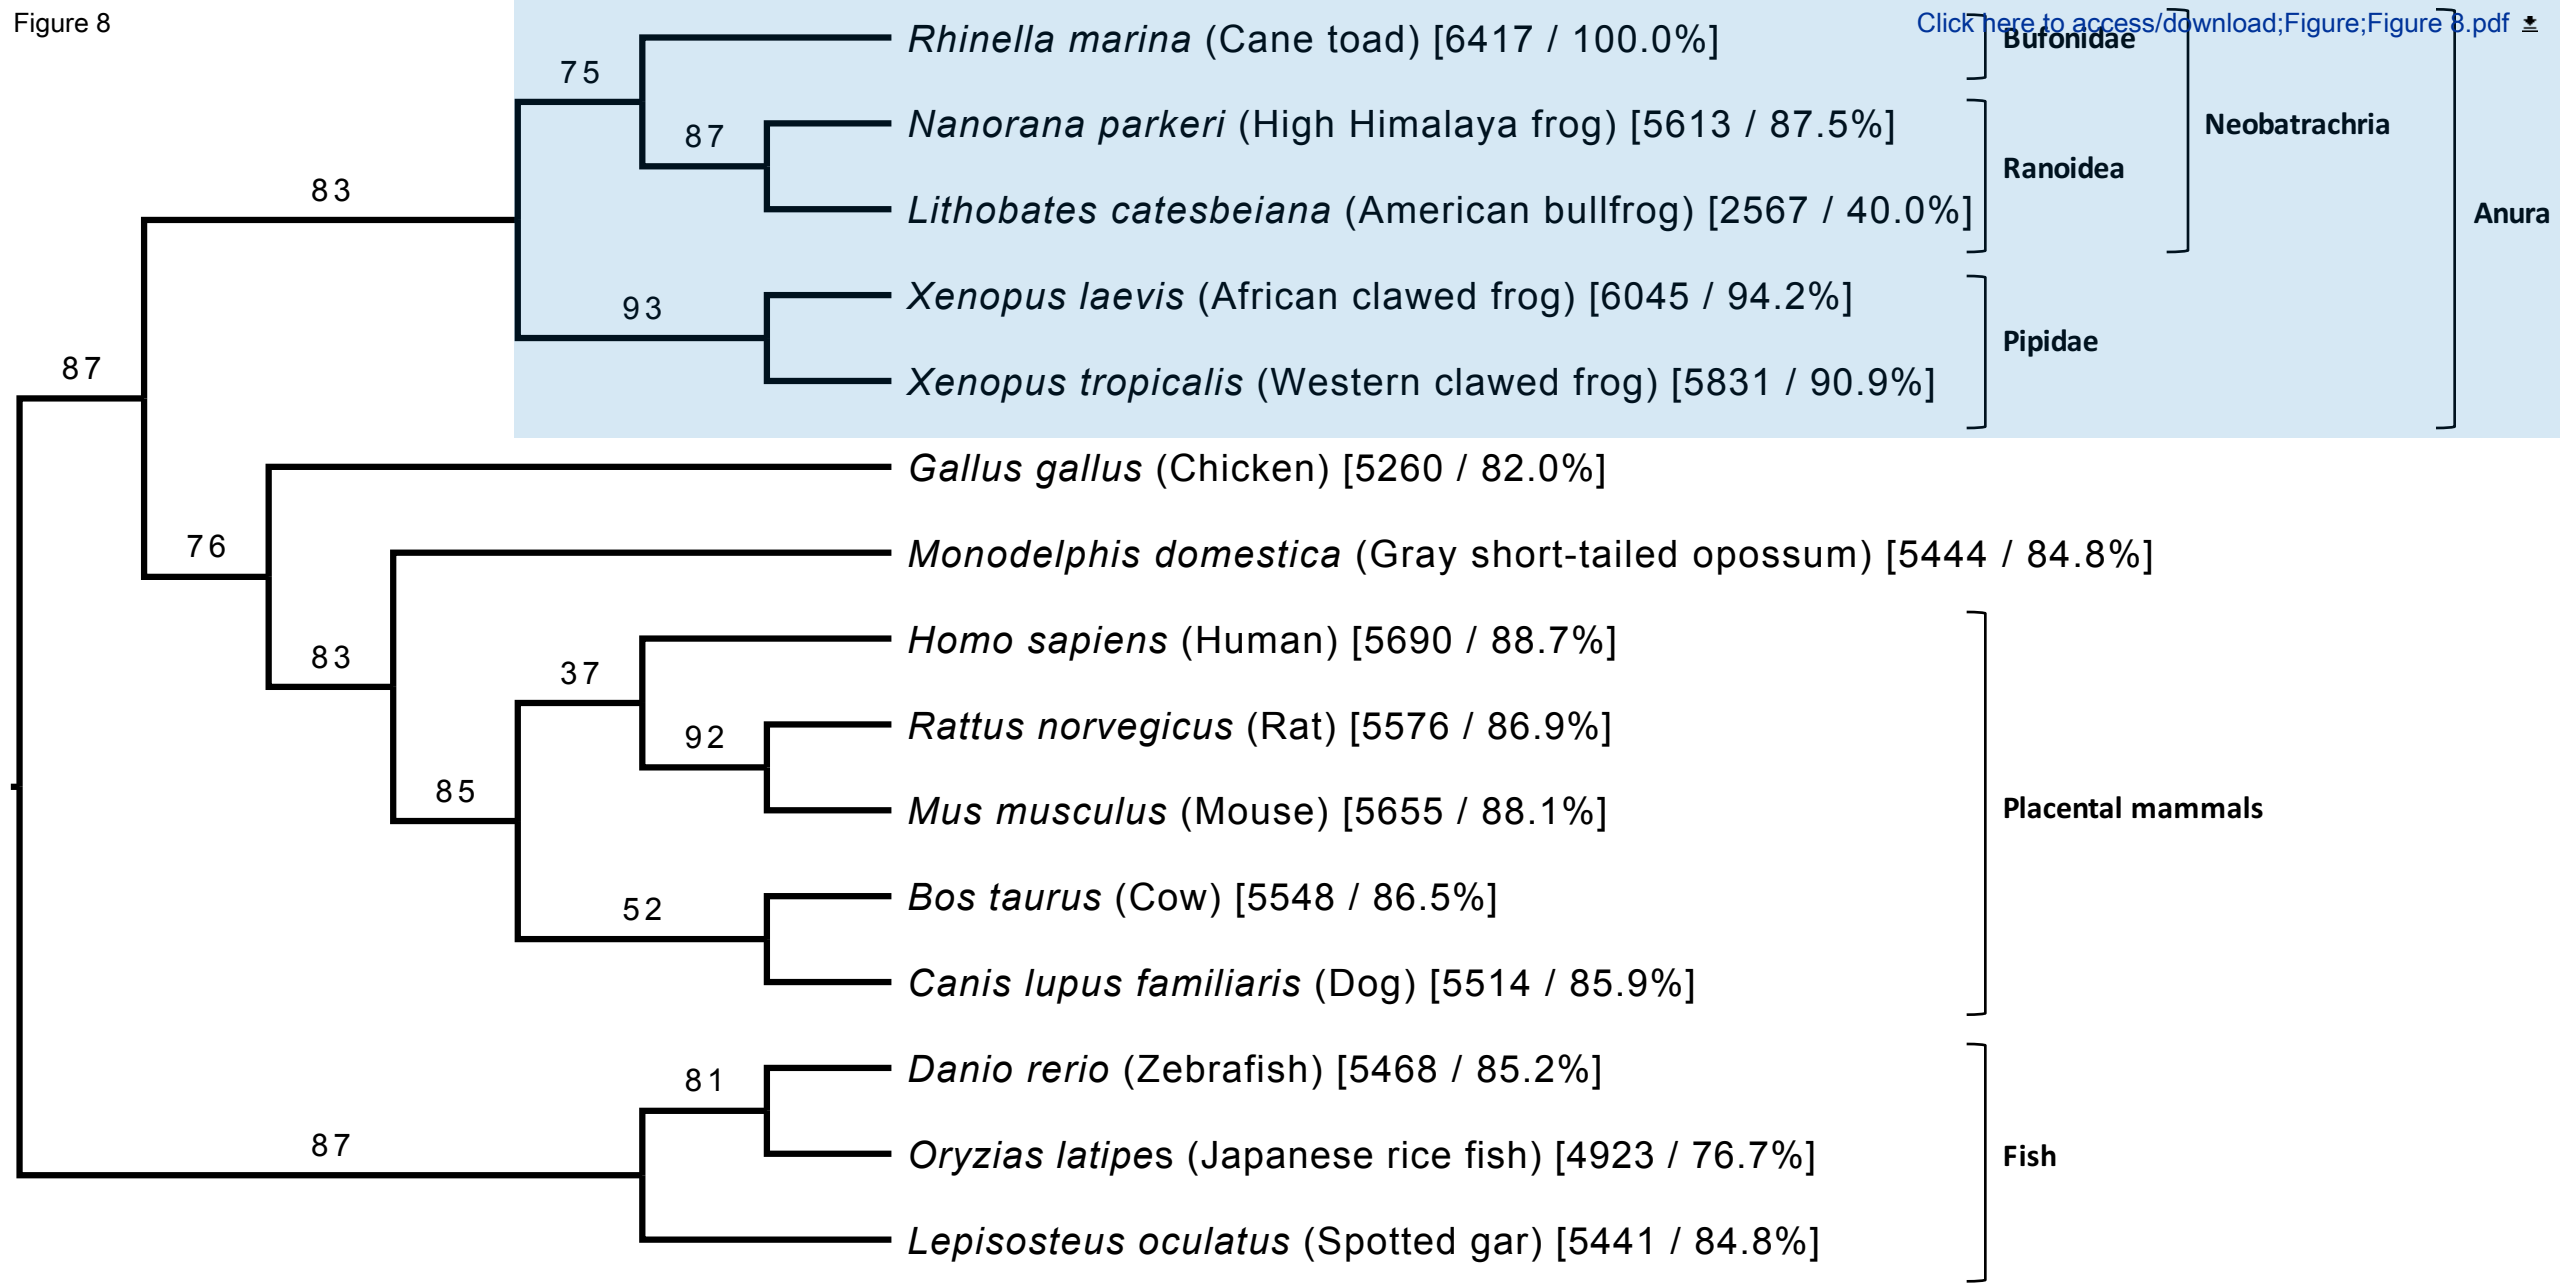

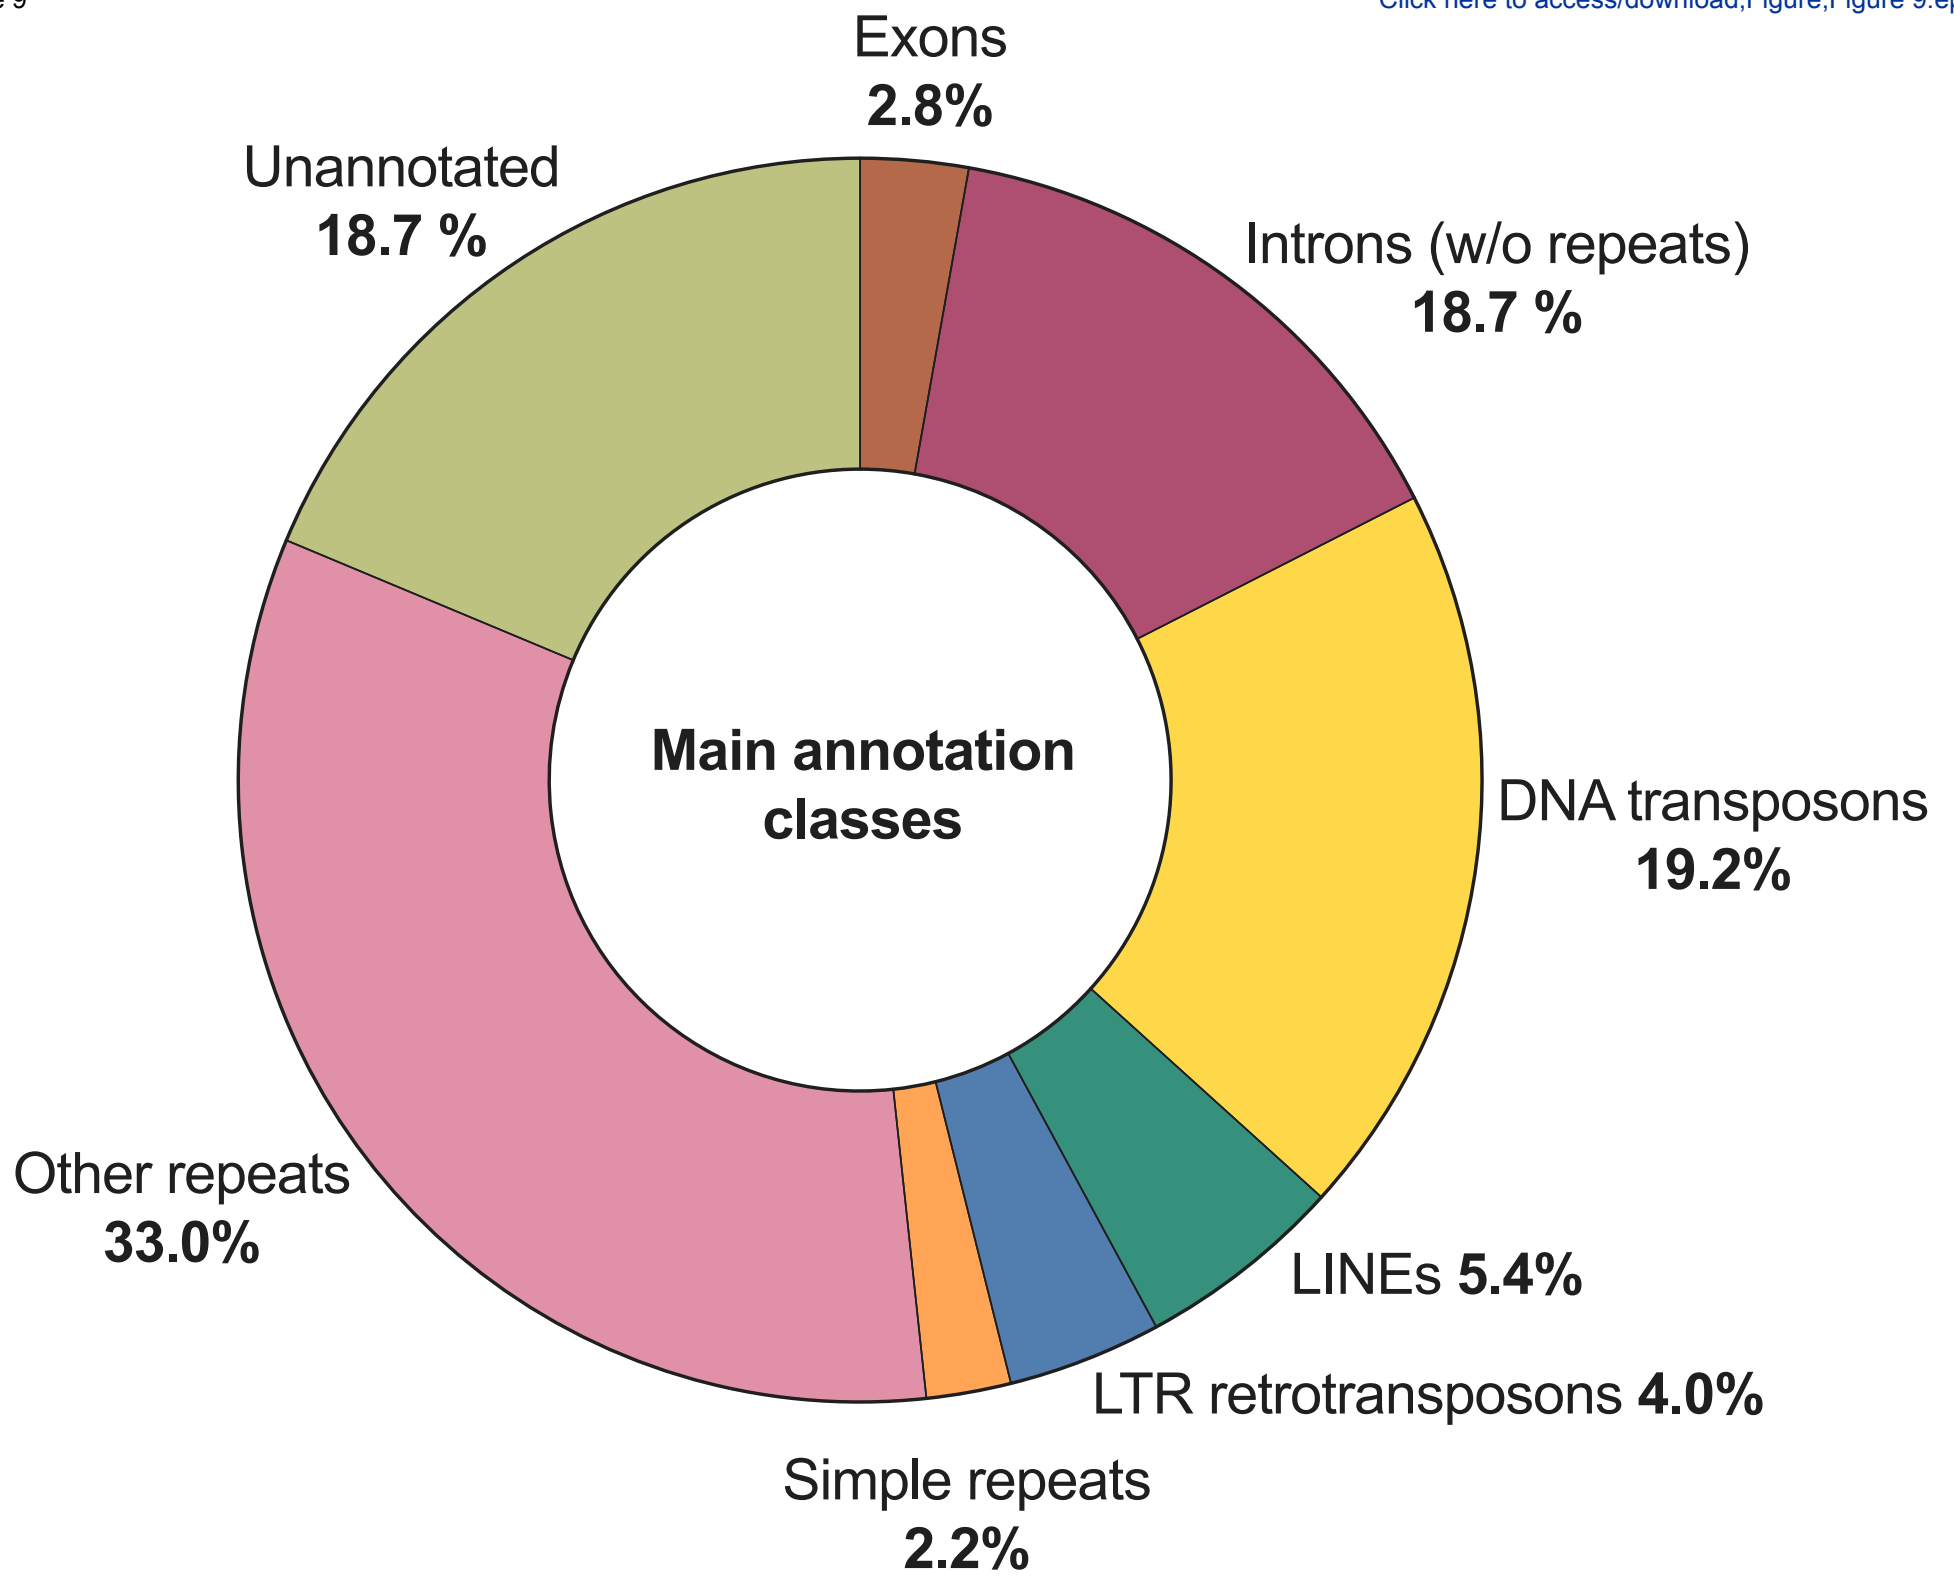



Click here to access/download  
**Supplementary Material**  
Figure S1.pdf



Click here to access/download  
**Supplementary Material**  
Table S1.xlsx





Click here to access/download  
**Supplementary Material**  
Table S2.xlsx



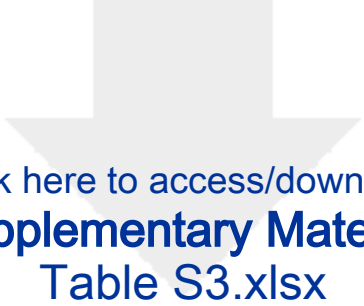

Click here to access/download  
**Supplementary Material**  
Table S3.xlsx



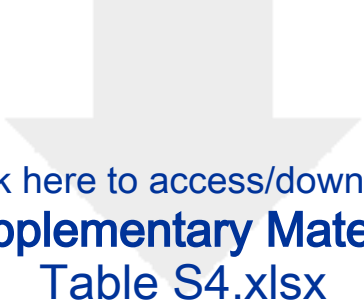

Click here to access/download  
**Supplementary Material**  
Table S4.xlsx



Supplement: giy095_giga-d-18-00104_revision_3.pdf [file giy095_giga-d-18-00104_revision_3.pdf]
