# Supplementary material for: Draft genome assembly of the invasive cane toad, Rhinella marina
Source: PubMed Central journal article supplement (PMC6145236; doi:10.1093/gigascience/giy095), 2018-08-07
Supplement: giy095_giga-d-18-00104_original_submission.pdf [file giy095_giga-d-18-00104_original_submission.pdf]

# GigaScience

## Draft genome assembly of the invasive cane toad, *Rhinella marina*

--Manuscript Draft--

|                                                      |                                                                                                                                                                                                                                                                                                                                                                                                                                                                                                                                                                                                                                                                                                                                                                                                                                                                                                                                                                                                                                                                                                                                                                                                                                                                                                                                                                                                                                                                                                                                                                                  |                                          |
|------------------------------------------------------|----------------------------------------------------------------------------------------------------------------------------------------------------------------------------------------------------------------------------------------------------------------------------------------------------------------------------------------------------------------------------------------------------------------------------------------------------------------------------------------------------------------------------------------------------------------------------------------------------------------------------------------------------------------------------------------------------------------------------------------------------------------------------------------------------------------------------------------------------------------------------------------------------------------------------------------------------------------------------------------------------------------------------------------------------------------------------------------------------------------------------------------------------------------------------------------------------------------------------------------------------------------------------------------------------------------------------------------------------------------------------------------------------------------------------------------------------------------------------------------------------------------------------------------------------------------------------------|------------------------------------------|
| <b>Manuscript Number:</b>                            | GIGA-D-18-00104                                                                                                                                                                                                                                                                                                                                                                                                                                                                                                                                                                                                                                                                                                                                                                                                                                                                                                                                                                                                                                                                                                                                                                                                                                                                                                                                                                                                                                                                                                                                                                  |                                          |
| <b>Full Title:</b>                                   | Draft genome assembly of the invasive cane toad, <i>Rhinella marina</i>                                                                                                                                                                                                                                                                                                                                                                                                                                                                                                                                                                                                                                                                                                                                                                                                                                                                                                                                                                                                                                                                                                                                                                                                                                                                                                                                                                                                                                                                                                          |                                          |
| <b>Article Type:</b>                                 | Data Note                                                                                                                                                                                                                                                                                                                                                                                                                                                                                                                                                                                                                                                                                                                                                                                                                                                                                                                                                                                                                                                                                                                                                                                                                                                                                                                                                                                                                                                                                                                                                                        |                                          |
| <b>Funding Information:</b>                          | Australian Research Council (DP160102991)                                                                                                                                                                                                                                                                                                                                                                                                                                                                                                                                                                                                                                                                                                                                                                                                                                                                                                                                                                                                                                                                                                                                                                                                                                                                                                                                                                                                                                                                                                                                        | Dr. Lee A Rollins<br>Prof. Richard Shine |
|                                                      | Australian Research Council (DE150101393)                                                                                                                                                                                                                                                                                                                                                                                                                                                                                                                                                                                                                                                                                                                                                                                                                                                                                                                                                                                                                                                                                                                                                                                                                                                                                                                                                                                                                                                                                                                                        | Dr. Lee A Rollins                        |
|                                                      | Australian Research Council (FL170100022)                                                                                                                                                                                                                                                                                                                                                                                                                                                                                                                                                                                                                                                                                                                                                                                                                                                                                                                                                                                                                                                                                                                                                                                                                                                                                                                                                                                                                                                                                                                                        | Prof. Edward C Holmes                    |
|                                                      | Australian Research Council (LE150100031)                                                                                                                                                                                                                                                                                                                                                                                                                                                                                                                                                                                                                                                                                                                                                                                                                                                                                                                                                                                                                                                                                                                                                                                                                                                                                                                                                                                                                                                                                                                                        | Prof. Marc R Wilkins                     |
|                                                      | Australian Research Council (FL120100074)                                                                                                                                                                                                                                                                                                                                                                                                                                                                                                                                                                                                                                                                                                                                                                                                                                                                                                                                                                                                                                                                                                                                                                                                                                                                                                                                                                                                                                                                                                                                        | Prof. Richard Shine                      |
|                                                      | The National Council for Scientific and Technological Development (CNPq) (302892/2016-8)                                                                                                                                                                                                                                                                                                                                                                                                                                                                                                                                                                                                                                                                                                                                                                                                                                                                                                                                                                                                                                                                                                                                                                                                                                                                                                                                                                                                                                                                                         | Assoc. Prof. Marcelo Vallinoto           |
|                                                      | Bioplatforms Australia                                                                                                                                                                                                                                                                                                                                                                                                                                                                                                                                                                                                                                                                                                                                                                                                                                                                                                                                                                                                                                                                                                                                                                                                                                                                                                                                                                                                                                                                                                                                                           | Not applicable                           |
| <b>Abstract:</b>                                     | <p>Background: The cane toad (<i>Rhinella marina</i>) is a species native to Central and South America that has spread across many regions of the globe. Cane toads are known for their rapid adaptation and deleterious impacts on native fauna in invaded regions. However, despite an iconic status, there are major gaps in our understanding of cane toad genetics. The availability of a genome would help to close these gaps and accelerate cane toad research. Findings: We report a draft genome assembly for <i>R. marina</i>, the first of its kind for the Bufonidae family. We used a combination of long read PacBio RS II and short read Illumina HiSeq X sequencing to generate a total of 359.5 Gb of raw sequence data. The final hybrid assembly of 31,392 scaffolds was 2.55 Gb in length with a scaffold N50 of 168 kb. BUSCO analysis revealed that the assembly included full length or partial fragments of 90.6% of tetrapod universal single-copy orthologs (n=3950), illustrating that the gene-containing regions have been well-assembled. Annotation predicted 58,302 protein coding genes, with 25,846 similar to known proteins in SwissProt. Repeat sequences were estimated to account for 63.9% of the assembly. Conclusion: The <i>R. marina</i> draft genome assembly will be an invaluable resource that can be used to further probe the biology of this invasive species. Future analysis of the genome will provide insights into cane toad evolution and enrich our understanding of their interplay with the ecosystem at large.</p> |                                          |
| <b>Corresponding Author:</b>                         | Peter White, Ph.D.<br>University of New South Wales<br>Sydney, NSW AUSTRALIA                                                                                                                                                                                                                                                                                                                                                                                                                                                                                                                                                                                                                                                                                                                                                                                                                                                                                                                                                                                                                                                                                                                                                                                                                                                                                                                                                                                                                                                                                                     |                                          |
| <b>Corresponding Author Secondary Information:</b>   |                                                                                                                                                                                                                                                                                                                                                                                                                                                                                                                                                                                                                                                                                                                                                                                                                                                                                                                                                                                                                                                                                                                                                                                                                                                                                                                                                                                                                                                                                                                                                                                  |                                          |
| <b>Corresponding Author's Institution:</b>           | University of New South Wales                                                                                                                                                                                                                                                                                                                                                                                                                                                                                                                                                                                                                                                                                                                                                                                                                                                                                                                                                                                                                                                                                                                                                                                                                                                                                                                                                                                                                                                                                                                                                    |                                          |
| <b>Corresponding Author's Secondary Institution:</b> |                                                                                                                                                                                                                                                                                                                                                                                                                                                                                                                                                                                                                                                                                                                                                                                                                                                                                                                                                                                                                                                                                                                                                                                                                                                                                                                                                                                                                                                                                                                                                                                  |                                          |
| <b>First Author:</b>                                 | Richard J Edwards                                                                                                                                                                                                                                                                                                                                                                                                                                                                                                                                                                                                                                                                                                                                                                                                                                                                                                                                                                                                                                                                                                                                                                                                                                                                                                                                                                                                                                                                                                                                                                |                                          |
| <b>First Author Secondary Information:</b>           |                                                                                                                                                                                                                                                                                                                                                                                                                                                                                                                                                                                                                                                                                                                                                                                                                                                                                                                                                                                                                                                                                                                                                                                                                                                                                                                                                                                                                                                                                                                                                                                  |                                          |
| <b>Order of Authors:</b>                             | Richard J Edwards                                                                                                                                                                                                                                                                                                                                                                                                                                                                                                                                                                                                                                                                                                                                                                                                                                                                                                                                                                                                                                                                                                                                                                                                                                                                                                                                                                                                                                                                                                                                                                |                                          |
|                                                      | Daniel Enosi Tuipulotu                                                                                                                                                                                                                                                                                                                                                                                                                                                                                                                                                                                                                                                                                                                                                                                                                                                                                                                                                                                                                                                                                                                                                                                                                                                                                                                                                                                                                                                                                                                                                           |                                          |
|                                                      | Timothy G Amos                                                                                                                                                                                                                                                                                                                                                                                                                                                                                                                                                                                                                                                                                                                                                                                                                                                                                                                                                                                                                                                                                                                                                                                                                                                                                                                                                                                                                                                                                                                                                                   |                                          |
|                                                      | Denis O'Meally                                                                                                                                                                                                                                                                                                                                                                                                                                                                                                                                                                                                                                                                                                                                                                                                                                                                                                                                                                                                                                                                                                                                                                                                                                                                                                                                                                                                                                                                                                                                                                   |                                          |

|                                                                                                                                                                                                                                                                                                                                                                                                                                                                                                                                     |                   |
|-------------------------------------------------------------------------------------------------------------------------------------------------------------------------------------------------------------------------------------------------------------------------------------------------------------------------------------------------------------------------------------------------------------------------------------------------------------------------------------------------------------------------------------|-------------------|
|                                                                                                                                                                                                                                                                                                                                                                                                                                                                                                                                     | Mark F Richardson |
|                                                                                                                                                                                                                                                                                                                                                                                                                                                                                                                                     | Tonia L Russell   |
|                                                                                                                                                                                                                                                                                                                                                                                                                                                                                                                                     | Marcelo Vallinoto |
|                                                                                                                                                                                                                                                                                                                                                                                                                                                                                                                                     | Miguel Carneiro   |
|                                                                                                                                                                                                                                                                                                                                                                                                                                                                                                                                     | Nuno Ferrand      |
|                                                                                                                                                                                                                                                                                                                                                                                                                                                                                                                                     | Marc R Wilkins    |
|                                                                                                                                                                                                                                                                                                                                                                                                                                                                                                                                     | Fernando Sequeira |
|                                                                                                                                                                                                                                                                                                                                                                                                                                                                                                                                     | Lee A Rollins     |
|                                                                                                                                                                                                                                                                                                                                                                                                                                                                                                                                     | Edward C Holmes   |
|                                                                                                                                                                                                                                                                                                                                                                                                                                                                                                                                     | Richard Shine     |
|                                                                                                                                                                                                                                                                                                                                                                                                                                                                                                                                     | Peter A White     |
| <b>Order of Authors Secondary Information:</b>                                                                                                                                                                                                                                                                                                                                                                                                                                                                                      |                   |
| <b>Additional Information:</b>                                                                                                                                                                                                                                                                                                                                                                                                                                                                                                      |                   |
| <b>Question</b>                                                                                                                                                                                                                                                                                                                                                                                                                                                                                                                     | <b>Response</b>   |
| Are you submitting this manuscript to a special series or article collection?                                                                                                                                                                                                                                                                                                                                                                                                                                                       | No                |
| <p><b>Experimental design and statistics</b></p> <p>Full details of the experimental design and statistical methods used should be given in the Methods section, as detailed in our <a href="#">Minimum Standards Reporting Checklist</a>. Information essential to interpreting the data presented should be made available in the figure legends.</p> <p>Have you included all the information requested in your manuscript?</p>                                                                                                  | Yes               |
| <p><b>Resources</b></p> <p>A description of all resources used, including antibodies, cell lines, animals and software tools, with enough information to allow them to be uniquely identified, should be included in the Methods section. Authors are strongly encouraged to cite <a href="#">Research Resource Identifiers</a> (RRIDs) for antibodies, model organisms and tools, where possible.</p> <p>Have you included the information requested as detailed in our <a href="#">Minimum Standards Reporting Checklist</a>?</p> | Yes               |
| <b>Availability of data and materials</b>                                                                                                                                                                                                                                                                                                                                                                                                                                                                                           | Yes               |

All datasets and code on which the conclusions of the paper rely must be either included in your submission or deposited in [publicly available repositories](#) (where available and ethically appropriate), referencing such data using a unique identifier in the references and in the “Availability of Data and Materials” section of your manuscript.

Have you have met the above requirement as detailed in our [Minimum Standards Reporting Checklist?](#)

**Draft genome assembly of the invasive cane toad, *Rhinella marina***

**Richard J Edwards<sup>1</sup>, Daniel Enosi Tuipulotu<sup>1†</sup>, Timothy G Amos<sup>1†</sup>, Denis O'Meally<sup>2</sup>, Mark F Richardson<sup>3,4</sup>, Tonia L Russell<sup>5</sup>, Marcelo Vallinoto<sup>6,7</sup>, Miguel Carneiro<sup>6</sup>, Nuno Ferrand<sup>6,8,9</sup>, Marc R Wilkins<sup>1,5</sup>, Fernando Sequeira<sup>6</sup>, Lee A Rollins<sup>3,10</sup>, Edward C Holmes<sup>11</sup>, Richard Shine<sup>12</sup> and Peter A White<sup>1,\*</sup>**

**†These authors contributed equally to the work.**

<sup>1</sup>School of Biotechnology and Biomolecular Sciences, University of New South Wales, Sydney, NSW, Australia

<sup>2</sup>Sydney School of Veterinary Science, Faculty of Science, University of Sydney, Camperdown, New South Wales, Australia

<sup>3</sup>School of Life and Environmental Sciences, Centre for Integrative Ecology, Deakin University, Geelong, VIC, Australia

<sup>4</sup>Bioinformatics Core Research Group, Deakin University, Geelong, VIC, Australia

<sup>5</sup>Ramaciotti Centre for Genomics, University of New South Wales, Sydney, NSW, Australia

<sup>6</sup>CIBIO/*InBIO*, Centro de Investigação em Biodiversidade e Recursos Genéticos, Universidade do Porto, Vairão, Portugal

<sup>7</sup>Laboratório de Evolução, Instituto de Estudos Costeiros (IECOS), Universidade Federal do Pará, Bragança, Pará, Brazil

<sup>8</sup>Departamento de Biologia, Faculdade de Ciências, Universidade do Porto, Porto, Portugal

<sup>9</sup>Department of Zoology, Faculty of Sciences, University of Johannesburg, Auckland Park, South Africa

<sup>10</sup>Evolution and Ecology Research Centre, School of Biological Earth and Environmental Sciences, University of New South Wales, Sydney, NSW, Australia

26 <sup>11</sup>Marie Bashir Institute for Infectious Diseases and Biosecurity, Charles Perkins Centre, School of Life  
27 and Environmental Sciences and Sydney Medical School, University of Sydney, Sydney, NSW,  
28 Australia

29 <sup>12</sup>School of Life and Environmental Sciences, Faculty of Science, University of Sydney, Camperdown,  
30 New South Wales, Australia

31

32 Emails of all authors: richard.edwards@unsw.edu.au (RJE), d.enedi@unsw.edu.au (DET),  
33 t.amos@unsw.edu.au (TGA), omeally@gmail.com (DO), m.richardson@deakin.edu.au (MFR),  
34 t.russell@unsw.edu.au (TLR), mvallinoto@cibio.up.pt (MV), miguel.carneiro@cibio.up.pt (MC),  
35 nferrand@cibio.up.pt (NF), m.wilkins@unsw.edu.au (MRW), fsequeira@cibio.up.pt (FS),  
36 l.rollins@unsw.edu.au (LAR), edward.holmes@sydney.edu.au (ECH), rick.shine@sydney.edu.au  
37 (RS), p.white@unsw.edu.au (PAW).

38

39 \*Corresponding author address: School of Biotechnology and Biomolecular Sciences, University of  
40 New South Wales, Sydney, NSW, Australia. Tel: +61-293853780; Email: [p.white@unsw.edu.au](mailto:p.white@unsw.edu.au)

41

42

43

44

45

46

47

48

49

50

51

52

53

54

55

56

57

## 51 Abstract

52 **Background:** The cane toad (*Rhinella marina*) is a species native to Central and South America that  
53 has spread across many regions of the globe. Cane toads are known for their rapid adaptation and  
54 deleterious impacts on native fauna in invaded regions. However, despite an iconic status, there are  
55 major gaps in our understanding of cane toad genetics. The availability of a genome would help to close  
56 these gaps and accelerate cane toad research. **Findings:** We report a draft genome assembly for *R.*  
57 *marina*, the first of its kind for the Bufonidae family. We used a combination of long read PacBio RS  
58 II and short read Illumina HiSeq X sequencing to generate a total of 359.5 Gb of raw sequence data.  
59 The final hybrid assembly of 31,392 scaffolds was 2.55 Gb in length with a scaffold N50 of 168 kb.  
60 BUSCO analysis revealed that the assembly included full length or partial fragments of 90.6% of  
61 tetrapod universal single-copy orthologs (n=3950), illustrating that the gene-containing regions have  
62 been well-assembled. Annotation predicted 58,302 protein coding genes, with 25,846 similar to known  
63 proteins in SwissProt. Repeat sequences were estimated to account for 63.9% of the assembly.  
64 **Conclusion:** The *R. marina* draft genome assembly will be an invaluable resource that can be used to  
65 further probe the biology of this invasive species. Future analysis of the genome will provide insights  
66 into cane toad evolution and enrich our understanding of their interplay with the ecosystem at large.

67  
68 **Keywords:** cane toad; *Rhinella marina*; sequencing; hybrid assembly; genome; annotation

## 73 **Data Description**

### 74 **Introduction**

75 The cane toad (*Rhinella marina*) (Figure 1) is a true toad (Bufonidae) native to Central and South  
76 America that has been introduced to many areas across the globe [1]. Since its introduction into  
77 Queensland in 1935, the cane toad has spread widely and now occupies more than 1.2 million square  
78 kilometres of the Australian continent, fatally poisoning predators like the northern quoll, freshwater  
79 crocodiles, and several species of native lizards and snakes [1-5]. The ability of cane toads to kill  
80 predators with toxic secretions has contributed to the success of their invasion [1]. To date, research on  
81 cane toads has focused primarily on ecological impacts, rapid evolution of phenotypic traits, and  
82 population genetics using neutral markers [6, 7], with limited knowledge of the genetic changes that  
83 allow the cane toad to thrive in the Australian environment [8-11]. A reference genome will be useful  
84 for studying loci subject to rapid evolution and could provide valuable insights into how invasive  
85 species adapt to new environments. Amphibian genomes have a preponderance of repetitive DNA [12,  
86 13], confounding assembly with the limited read lengths of first- and second-generation sequencing  
87 technologies. Here, we employ a hybrid assembly of PacBio long reads and Illumina short reads (Figure  
88 2) to overcome assembly challenges presented by the repetitive nature of the cane toad genome. Using  
89 this approach, we assembled a draft genome of *R. marina* that is comparable in contiguity and  
90 completeness to other published anuran genomes [14-17]. We used our previously published  
91 transcriptomic data [18] and other published anuran sequences to annotate the genome. Our draft cane  
92 toad assembly will serve as a reference for genetic and evolutionary studies, and provides a template  
93 for continued refinement with additional sequencing efforts.

### 94 **Sample collection, library construction and sequencing**

95 Adult female cane toads were collected by hand from Forrest River in Oombulgurri, WA (15.1818°S,  
96 127.8413°E) in June 2015. Toads were placed in individual damp cloth bags and transported by plane  
97 to Sydney, NSW before they were anaesthetised by refrigeration for four hours and killed by subsequent  
98 freezing. High-molecular weight genomic DNA (gDNA) was extracted from the liver of a single female

99 using the genomic-tip 100/G kit (Qiagen, Hilden, Germany). This was performed with supplemental  
100 RNase (Astral Scientific, Taren Point, Australia) and proteinase K (NEB, Ipswich, MA, USA)  
101 treatment, as per the manufacturer's instructions. Isolated genomic DNA was further purified using  
102 AMPure XP beads (Beckman Coulter, Brea, CA, USA) to eliminate sequencing inhibitors. DNA  
103 quantity was assessed using the Quanti-iT PicoGreen dsDNA kit (Thermo Fisher Scientific, Waltham,  
104 MA, USA), DNA purity was calculated using a Nanodrop spectrophotometer (Thermo Fisher  
105 Scientific), and molecular integrity assessed by pulse-field gel electrophoresis.

106 For short read sequencing, a paired-end library was constructed from the gDNA using the TruSeq PCR-  
107 free library preparation kit (Illumina, San Diego, CA, USA). Insert sizes ranged between 200-800 bp.  
108 This library was sequenced ( $2 \times 150$  bp) on the HiSeq X Ten platform (Illumina) to generate  
109 approximately 282.9 Gb of raw data (Table 1). Illumina short sequencing reads were assessed for  
110 quality using FastQC v0.10.1 [19]. Low quality reads filtered were trimmed using Trimmomatic v0.36  
111 [20] with a Q30 threshold (LEADING:30, TRAILING:30, SLIDINGWINDOW:4:30) and a minimum  
112 100 bp read length, leaving 64.9% of the reads generated, of which 75.2% were in retained read pairs.  
113 For long read sequencing, we utilised the single-molecule real time (SMRT) sequencing technology  
114 (Pacific Biosciences, Menlo Park, CA, USA). Four SMRTbell libraries were prepared from gDNA  
115 using the SMRTBell template preparation kit 1.0 (Pacific Biosciences). To increase subread length,  
116 either 15-50 kb or 20-50 kb BluePippin size selection (Sage Science, Beverly, MA, USA) was  
117 performed on each library. Recovered fragments were sequenced using P6C4 sequencing chemistry on  
118 the RS II platform (240 min movie time). The four SMRTbell libraries were sequenced on a total of 97  
119 SMRT cells to generate 7,745,233 subreads for a total of 76.6 Gb of raw data. Collectively, short and  
120 long read sequencing produced around 359.5 Gb of data (Table 1).

## 121 **Genome assembly**

122 We employed a hybrid *de novo* whole genome assembly strategy, combining both short read and long  
123 read data. Trimmed Q30-filtered short reads were *de novo* assembled with ABySS v1.3.6 [21] using  
124  $k=64$  and default parameters (contig N50 = 583 bp) (Table 2). Long sequence reads were *de novo*



125 assembled using the program DBG2OLC [22] (k 17 AdaptiveTh 0.0001 KmerCovTh 2 MinOverlap 20  
1 RemoveChimera 1) (contig N50 = 167.04 kbp) (Table 2). Following this, both assemblies were merged  
2  
3  
4 127 together using the hybrid assembler ('sparc') tool of DBG2OLC with default parameters, combining  
5  
6 128 the contiguity of the long read data with the improved accuracy of the high coverage Illumina assembly.  
7  
8 129 This hybrid assembly (v2.0) was twice 'polished' to remove errors. In the first round, the Q30 trimmed  
9  
10  
11 130 Illumina reads were mapped to the hybrid assembly with bowtie v2.2.9 [23] and filtered for proper pairs  
12  
13 131 using samtools v1.3.1 [24]. The contigs were then polished with Pilon v1.21 [25] to generate the second  
14  
15 132 iteration of the assembled genome (v2.1). In the second round, PacBio subreads were mapped to  
16  
17 133 assembly v2.1 for error correction using SMRT analysis software (Pacific Biosciences): PacBio  
18  
19 134 subreads for each library were converted to BAM format with bax2bam v0.0.08 and aligned to the  
20  
21  
22 135 genome using palign v.0.3.0. BAM alignment files were combined using samtools merge v1.3.1 and  
23  
24 136 the contigs polished with Arrow v2.1.0 to generate the final genome assembly (v2.2). Our final draft  
25  
26 137 assembly of the cane toad genome (v2.2) has 31,392 scaffolds with an N50 of 167 kb (Table 2). The  
27  
28  
29 138 GC content (43.23%) is within 1% of the published estimate of 44.17%, determined by flow cytometry  
30  
31 139 [26].  
32  
33

## 34 140 **Assessment of genome completeness**

37 141 BUSCO [27] analysis of conserved single copy orthologues is widely used as a proxy for genome  
38  
39 142 completeness and accuracy. While direct comparisons are only truly valid within an organism,  
40  
41 143 comparing BUSCO scores to genomes from related organisms provides a useful benchmark. We ran  
42  
43 144 BUSCO v2.0.1 (short mode, lineage tetrapoda\_odb9, BLAST+ v2.2.31 [28], HMMer v3.1b2 [29],  
44  
45 145 AUGUSTUS v3.2.2 [30], EMBOSS v6.5.7 [31]) on each of our assemblies, along with four published  
46  
47 146 anuran genomes (Figure 3, Table 2). The hybrid assembly combined the completeness of the long read  
48  
49 147 assembly with the accuracy of the short read assembly, providing an enormous boost in BUSCO  
50  
51 148 completeness from less than 50% full and partial orthologs to over 90%. Error correction through pilon  
52  
53 149 and arrow polishing had a positive effect on the BUSCO measurement of genome completeness, with  
54  
55 150 an increase of 7.8% in the number of full and partial orthologs between v2.0 and 2.2. For the polished  
56  
57 151 assembly (v2.2), 3279 (83.0%) of the 3950 ultra-conserved tetrapod genes were complete, 296 (7.5%)  
58  
59  
60

1 were fragmentary and 375 (9.5%) were missing. By these metrics, our draft *R. marina* genome is  
2 approaching the quality and completeness of the widely used anuran amphibian reference genomes for  
3  
4 *X. laevis* (v9.2) [17] and *X. tropicalis* (v.9.1) [16] and compares well to the recently published  
5  
6 neobatrachian genomes of *Nanorana parkeri* (v2) [15] and *Lithobates catesbeianus* (v2.1) [14].  
7  
8  
9

## 10 **Estimation of *R. marina* genome size**

11  
12 Previous reports have estimated the size of the cane toad genome from 3.98-5.65 Gb using either  
13  
14 densitometry or flow cytometry analysis of stained nuclei within erythrocytes, hepatocytes and renal  
15  
16 cells [26, 32-38]. We employed two alternative strategies to measure the genome size, using short read  
17  
18 k-mer distributions and qPCR of single copy genes. K-mer frequencies were calculated for both raw  
19  
20 and trimmed Q30-filtered paired-end short reads (Table 1) with Jellyfish v2.2.3 [39] using  $k=21$  and  
21  
22  $k=23$ , and a maximum k-mer count of 10,000. K-mer distributions were analysed using GenomeScope  
23  
24 [40] with mean read lengths of 148 bp (raw) or 141 bp (Q30) and k-mer coverage cut-offs of 1000 and  
25  
26 10,000 (Table 3, Figure 4). GenomeScope gave genome size estimates ranging from 1.77 Gb to 2.30  
27  
28 Gb with the raw reads giving consistently larger estimates (1.85 Gb to 2.30 Gb) than the trimmed and  
29  
30 filtered reads (1.77 Gb to 2.10 Gb). Estimates of the unique (single copy) region of the genome were  
31  
32 more consistent, ranging from 1.31 Gb to 1.46 Gb, with  $k=23$  estimates 99 Mb (raw) or 80 Mb (Q30)  
33  
34 higher than  $k=21$ . Increasing the GenomeScope maximum k-mer coverage threshold had the greatest  
35  
36 effect on predicted genome size, increasing repeat length estimates by 274 Mb to 385 Mb.  
37  
38 GenomeScope predictions are affected by non-uniform repeat distributions and this difference could  
39  
40 indicate high copy number repeats in the genome that are difficult to model accurately. It is possible  
41  
42 that high frequency repeats with raw sequencing counts exceeding 10,000 are resulting in an  
43  
44 underestimate of total repeat length and therefore genome size, compared to the previous densitometry  
45  
46 and flow cytometry predictions.  
47  
48  
49  
50  
51  
52

53 In the second approach, the *zfp292* (zinc finger protein 292) gene was selected from our  
54  
55 BUSCO analysis as a single-copy target for genome estimation by qPCR [41]. First, PCR was used to  
56  
57 amplify a 326 bp region of *zfp292* (contig 6589, position 345,750-346,075) in a 25  $\mu$ L reaction that  
58  
59 contained 50 ng of gDNA, 200  $\mu$ M dNTP, 0.625 units of Taq polymerase (Invitrogen), 10  $\times$  Taq  
60  
61  
62  
63  
64  
65

179 polymerase buffer (Invitrogen) and 0.4  $\mu$ M of each primer (Table S1). The PCR conditions were as  
1 follows: 95°C for 5 min, 35 cycles of 95°C for 30 s, 60°C for 30 s and 68°C for 30 s followed by a final  
2 180 extension at 68°C for 5 min. The amplicon was cloned into the pGEM-T Easy vector (Promega,  
3 181 Madison, WI, USA) and the resultant plasmid was linearised with NdeI before being serially diluted to  
4 182 generate a qPCR standard (10<sup>1</sup>-10<sup>9</sup> copies/ $\mu$ L). To amplify a smaller region (120 bp) within *zfp292*  
5 183 (contig 6589, position 345,858-345,977) gDNA (10-25 ng) or 1  $\mu$ L of the diluted standards were used  
6 184 as a template for a 20  $\mu$ L qPCR reaction containing 2  $\times$  iTaq SYBR Green mastermix (BioRad,  
7 185 Hercules, CA, USA) and 0.5  $\mu$ M of each primer (Table S1). The qPCR conditions were as follows:  
8 186 95°C for 10 min, 40 cycles of 95°C for 20 s, 60°C for 20 s and 72°C for 20 s. Cycle threshold values  
9 187 obtained for each plasmid dilution were used to generate a standard curve and infer the number of  
10 188 *zfp292* amplicons generated from the template gDNA of known quantity. Genome sizes were generated  
11 189 from the formulae outlined by [41] and the average of two estimates were used to obtain a haploid  
12 190 genome size of 2.38 Gb. This genome size provides an estimated combined 151X sequencing coverage  
13 191 (119X Illumina and 32X PacBio) (Table 4).  
14 192

15 193 Our genome size estimation of 1.98 to 2.38 Gbp is smaller than the 2.55 Gbp assembly size, and differs  
16 194 significantly from previously published estimates of 4 Gbp or more for this species. We suggest this is  
17 195 a result of the repetitive nature of the genome (see below). Given this is the first estimate of genome  
18 196 size using either k-mer or qPCR analysis, further investigations are required to more clearly understand  
19 197 the discrepancy in our estimates with respect to published genome sizes in anurans. Here we estimate  
20 198 the depth of sequencing coverage using both sequence-based and cytometric genome size measures  
21 199 (Table 4).  
22 200

## 200 **Genome annotation and gene prediction**

201 Annotation of the draft genome was performed using MAKER2 v2.31.6 [42], BLAST+ v2.2.31 [28],  
202 AUGUSTUS v3.2.2 [30], Exonerate v2.2.0 [43], RepeatMasker v4.0.6 [44] (DFAM [45], Library  
203 Dfam\_1.2; RMLibrary v20150807), RepeatModeler v1.0.8 [46] and SNAP v2013-11-29 [47] using all  
204 SwissProt protein sequences (downloaded 2017-02-23)[48] . AUGUSTUS was trained using BUSCO

205 v2.0.1 (long mode, lineage tetrapoda\_odb9) and a multi-tissue reference transcriptome we previously  
206 generated from tadpoles and six adult cane toad tissues [18] (available from GigaDB [49], Genbank  
207 accession PRJNA383966). After the initial training run, two further iterations of MAKER2 were run  
208 using HMMs from SNAP training created from the previous run. Functional annotation of protein-  
209 coding genes predicted by MAKER2 were generated using Interproscan 5.25-64.0, with the following  
210 settings: -dp -t p -pa -goterms -iprlookup -appl TIGRFAM, SFLD, Phobius, SUPERFAMILY,  
211 PANTHER, Gene3D, Hamap, ProSiteProfiles, Coils, SMART, CDD, PRINTS, ProSitePatterns,  
212 SignalP\_EUK, Pfam, ProDom, MobiDBLite, PIRSF, TMHMM. BLAST+ v2.6.0 [28] was used to  
213 annotate predicted genes using all Swissprot proteins (release 2017\_08, downloaded 2017-09-01) [48]  
214 using the following settings: -evalue 0.000001 -seg yes -soft\_masking true -lcase\_masking -max\_hsps  
215 1.

216 In total, 58,302 protein-coding genes were predicted by the MAKER pipeline with an average of 5.3  
217 exons and 4.3 introns per gene (Table 5). Of these, 5,225 are single exon genes, giving 4.7 introns per  
218 multi-exon gene with an average intron length of 4.08 kb. Predicted coding sequences make up 2.38%  
219 of the assembly. MAKER predicted considerably more than the approximately twenty thousand genes  
220 expected for a typical vertebrate genome. There are two likely explanations for this: (1) artefactual  
221 duplications in the genome assembly, either through under-assembly or legitimate assembly of two  
222 heterozygous diploid copies; (2) over-prediction of proteins during genome annotation, including  
223 pseudogenes with high homology to functional genes. Of the 3,279 complete BUSCO genes identified  
224 (Table 2), only 85 (2.59%) were duplicated. This suggests that there is not widespread duplication in  
225 the assembly. Only 25,846 predicted genes were similar to known proteins in SwissProt, with the  
226 remaining 32,456 predictions “of unknown function”. This is consistent with over-prediction being the  
227 primary cause of inflated gene numbers. The predicted proteins of unknown function have a very  
228 different size distribution (median length 171 aa) to those with Swissprot hits (median length 388 aa).  
229 To investigate this further, predicted transcript and protein sequences were searched against the  
230 published *de novo* assembled transcriptome [18] using BLAST+ v2.2.31 [28] blastn or tblastn (top 10  
231 hits,  $e\text{-value} < 10^{-10}$ ) and compiled with GABLAM v2.28.3 [50]. For 56.5% of proteins with functional

232 annotation, 95%+ of the protein length mapped to the top transcript hit (Table 6). Only 27.1% of  
233 unknown proteins had 95%+ coverage in the top transcript hit, which is again consistent with over-  
234 prediction. It should also be noted that some of the predicted genes may represent lncRNA genes that  
235 have been incorrectly assigned a coding sequence.

## 236 Repeat identification and analysis

237 The cane toad genome has proven very difficult to assemble using short reads alone, which suggests a  
238 high frequency of repetitive sequences, as for other amphibians [12, 13]. RepeatMasker annotations  
239 from the MAKER pipeline support this interpretation, with over 4.1 million repeat sequences detected,  
240 accounting for 63.9% of the assembly (Table 5). Critically, the average length of most of these repeat  
241 classes exceed the Illumina read length, rendering accurate assembly with short reads impossible. The  
242 most abundant class of repeat elements are of unknown type (1.61 million elements covering 32.28%  
243 of the assembly), with DNA transposons the most abundant known class of element (817,262 repeats;  
244 19.17% coverage). Of these, the most abundant are of the hAT-Ac (231,332 copies) and TcMar-Tc1  
245 (226,145 copies) superfamilies (Table S2). Accounting for overlaps between repeat and gene features,  
246 18.7% of the assembly (479,397,014 bp) has no annotation (Figure 5).

## 247 Conclusion

248 This draft genome assembly sets a milestone in the field of anuran genetics and will be an invaluable  
249 tool for advancing knowledge of anuran biology, genetics and the evolution of invasive species.  
250 Furthermore, we envisage these data will facilitate the development of biocontrol strategies that reduce  
251 the impact of cane toads on native fauna.

## 252 Availability of supporting data

253 Raw genomic sequencing data (Illumina and PacBio) and assembled scaffolds have been deposited in  
254 the ENA with the study accession PRJEB24695 and assembly accession GCA\_900303285. The genome  
255 assembly and annotation are also available in the *GigaScience* database.

256 **List of abbreviations**

257 BUSCO: Benchmarking Universal Single-Copy Orthologs; qPCR: quantitative polymerase chain  
258 reaction, CDS: coding sequence; bp: base pair; gDNA: genomic DNA; SMRT: single-molecule real  
259 time; SINE: short interspersed nuclear element; LINE: long interspersed nuclear element, LTR: long  
260 terminal repeat; UTR: untranslated region

261 **Additional files**

262 Table S1. Primers used for genome size estimation by single copy gene qPCR.

263 Table S2. RepeatMasker statistics broken down by repeat category.

264 **Ethics approval and consent to participate**

265 All experimentation was performed under the approval of the University of Sydney Animal Ethics  
266 Committee.

267 **Consent for publication**

268 Not applicable

269 **Competing interests**

270 The authors declare that they have no competing interests.

271 **Funding**

272 This work was supported by the Cane Toad Genome Consortium and Bioplatforms Australia. Funding  
273 was provided by the Australian Research Council (DP160102991). L.A.R. is funded by ARC DECRA  
274 Fellowship (DE150101393). R.S. is funded by ARC Australian Laureate Fellowship (FL120100074).  
275 E.C.H. is funded by ARC Australian Laureate Fellowship (FL170100022). M.R.W. and the Ramaciotti  
276 Centre for Genomics acknowledge infrastructure funding from the Australian Research Council  
277 (LE150100031), the Australian Government NCRIS scheme administered by Bioplatforms Australia  
278 and the New South Wales Government RAAP scheme. M.V. is supported by a CNPq fellowship

279 (302892/2016-8). D.E.T. was supported through an Australian Government Research Training Program  
280 (RTP) scholarship.

## 281 **Author's contributions**

282 P.A.W coordinated the project. P.A.W, R.S, E.C.H, L.A.R, R.J.E, M.W. designed the study. P.A.W,  
283 R.S, E.C.H, L.A.R, R.J.E and F.S funded the project. R.S provided the cane toad samples. D.E.T  
284 performed the genomic DNA extraction, PCR experiments and data analysis. T.L.R performed the  
285 sequencing. R.J.E and T.G.A performed the genome assemblies and primary data analysis. D.O and  
286 T.G.A. performed the genome annotation. R.J.E, D.E.T, T.G.A and P.A.W and wrote the manuscript.  
287 All authors edited and approved the final manuscript.

## 288 **Acknowledgements**

289 We thank the Ramaciotti Centre for Genomics, UNSW and the Kinghorn Centre for Clinical Genomics  
290 at the Garvan Institute of Medical Research who performed the sequencing in this study. This project  
291 was undertaken with the assistance of resources and services from the National Computational  
292 Infrastructure (NCI), which is supported by the Australian Government. This project used  
293 computational resources from Intersect, which were in part supported by the Australian Research  
294 Council. The authors acknowledge UNSW Science's high performance computing cluster (Katana), the  
295 UNSW School of Biotechnology and Biomolecular Sciences high memory node, the Sydney  
296 Informatics Hub and the University of Sydney's high performance computing cluster (Artemis) for  
297 providing the high performance computing resources that have contributed to the research results  
298 reported within this paper. We thank the members of the UNSW Science Faculty Computing unit,  
299 particularly Duncan Smith, for all his help getting software installed and running on the katana computer  
300 cluster. We thank Dr Andrew Kelly for early discussions on cane toad genome size and technical  
301 assistance with gDNA extractions.

302

303 **References**

1. Shine R. The ecological impact of invasive cane toads (*Bufo marinus*) in Australia. *The Quarterly Review of Biology*. 2010;85 3:253-91.
2. Phillips BL, Brown GP, Greenlees M, Webb JK and Shine R. Rapid expansion of the cane toad (*Bufo marinus*) invasion front in tropical Australia. *Austral Ecology*. 2007;32 2:169-76.
3. Phillips BL, Brown GP and Shine R. Assessing the potential impact of cane toads on Australian snakes. *Conservation Biology*. 2003;17 6:1738-47.
4. Smith JG and Phillips BL. Toxic tucker: the potential impact of cane toads on Australian reptiles. *Pacific Conservation Biology*. 2006;12 1:40-9.
5. Urban MC, Phillips BL, Skelly DK and Shine R. The cane toad's (*Chaunus* [*Bufo*] *marinus*) increasing ability to invade Australia is revealed by a dynamically updated range model. *Proceedings of the Royal Society of London B: Biological Sciences*. 2007;274 1616:1413-9.
6. Slade R and Moritz C. Phylogeography of *Bufo marinus* from its natural and introduced ranges. *Proceedings of the Royal Society of London B: Biological Sciences*. 1998;265 1398:769-77.
7. Sequeira F, Sodr e D, Ferrand N, Bernardi JA, Sampaio I, Schneider H, et al. Hybridization and massive mtDNA unidirectional introgression between the closely related Neotropical toads *Rhinella marina* and *R. schneideri* inferred from mtDNA and nuclear markers. *BMC evolutionary biology*. 2011;11 1:264.
8. Rollins LA, Richardson MF and Shine R. A genetic perspective on rapid evolution in cane toads (*Rhinella marina*). *Molecular Ecology*. 2015;24 9:2264-76.
9. Estoup A, Baird SJ, Ray N, Currat M, CORNUET J, Santos F, et al. Combining genetic, historical and geographical data to reconstruct the dynamics of bioinvasions: application to the cane toad *Bufo marinus*. *Molecular ecology resources*. 2010;10 5:886-901.
10. Trumbo DR, Epstein B, Hohenlohe PA, Alford RA, Schwarzkopf L and Storfer A. Mixed population genomics support for the central marginal hypothesis across the invasive range of the cane toad (*Rhinella marina*) in Australia. *Molecular ecology*. 2016;25 17:4161-76.
11. Leblois R, Rousset F, Tikel D, Moritz C and Estoup A. Absence of evidence for isolation by distance in an expanding cane toad (*Bufo marinus*) population: an individual-based analysis of microsatellite genotypes. *Molecular Ecology*. 2000;9 11:1905-9.
12. Bozzoni I and Beccari E. Clustered and interspersed repetitive DNA sequences in four amphibian species with different genome size. *Biochimica et Biophysica Acta (BBA)-Nucleic Acids and Protein Synthesis*. 1978;520 2:245-52.
13. Olmo E. Genome variations in the transition from amphibians to reptiles. *Journal of molecular evolution*. 1991;33 1:68-75.
14. Hammond SA, Warren RL, Vandervalk BP, Kucuk E, Khan H, Gibb EA, et al. The North American bullfrog draft genome provides insight into hormonal regulation of long noncoding RNA. *Nature Communications*. 2017;8 1:1433.
15. Sun Y-B, Xiong Z-J, Xiang X-Y, Liu S-P, Zhou W-W, Tu X-L, et al. Whole-genome sequence of the Tibetan frog *Nanorana parkeri* and the comparative evolution of tetrapod genomes. *Proceedings of the National Academy of Sciences*. 2015;112 11:E1257-E62.
16. Hellsten U, Harland RM, Gilchrist MJ, Hendrix D, Jurka J, Kapitonov V, et al. The genome of the Western clawed frog *Xenopus tropicalis*. *Science*. 2010;328 5978:633-6.
17. Session AM, Uno Y, Kwon T, Chapman JA, Toyoda A, Takahashi S, et al. Genome evolution in the allotetraploid frog *Xenopus laevis*. *Nature*. 2016;538 7625:336.
18. Richardson MF, Sequeira F, Selechnik D, Carneiro M, Vallinoto M, Reid JG, et al. Improving amphibian genomic resources: a multi-tissue reference transcriptome of an iconic invader. *GigaScience*. 2017;7 1:1-7.
19. Andrews S. FastQC: a quality control tool for high throughput sequence data. 2010.
20. Bolger AM, Lohse M and Usadel B. Trimmomatic: a flexible trimmer for Illumina sequence data. *Bioinformatics*. 2014;30 15:2114-20.
21. Simpson JT, Wong K, Jackman SD, Schein JE, Jones SJ and Birol I. ABySS: a parallel assembler for short read sequence data. *Genome research*. 2009;19 6:1117-23.



- 355 22. Ye C, Hill CM, Wu S, Ruan J and Ma ZS. DBG2OLC: efficient assembly of large genomes  
1 356 using long erroneous reads of the third generation sequencing technologies. *Scientific reports*.  
2 357 2016;6:31900.
- 3 358 23. Langmead B and Salzberg SL. Fast gapped-read alignment with Bowtie 2. *Nature methods*.  
4 359 2012;9 4:357-9.
- 5 360 24. Li H, Handsaker B, Wysoker A, Fennell T, Ruan J, Homer N, et al. The sequence  
6 361 alignment/map format and SAMtools. *Bioinformatics*. 2009;25 16:2078-9.
- 7 362 25. Walker BJ, Abeel T, Shea T, Priest M, Abouelliel A, Sakthikumar S, et al. Pilon: an integrated  
8 363 tool for comprehensive microbial variant detection and genome assembly improvement. *PloS*  
9 364 *one*. 2014;9 11:e112963.
- 11 365 26. Vinogradov AE. Genome size and GC-percent in vertebrates as determined by flow cytometry:  
12 366 The triangular relationship. *Cytometry Part A*. 1998;31 2:100-9.
- 13 367 27. Simão FA, Waterhouse RM, Ioannidis P, Kriventseva EV and Zdobnov EM. BUSCO:  
14 368 assessing genome assembly and annotation completeness with single-copy orthologs.  
15 369 *Bioinformatics*. 2015;31 19:3210-2.
- 16 370 28. Camacho C, Coulouris G, Avagyan V, Ma N, Papadopoulos J, Bealer K, et al. BLAST+:  
17 371 architecture and applications. *BMC bioinformatics*. 2009;10 1:421.
- 18 372 29. Mistry J, Finn RD, Eddy SR, Bateman A and Punta M. Challenges in homology search:  
19 373 HMMER3 and convergent evolution of coiled-coil regions. *Nucleic acids research*. 2013;41  
20 374 12:e121-e.
- 22 375 30. Keller O, Kollmar M, Stanke M and Waack S. A novel hybrid gene prediction method  
23 376 employing protein multiple sequence alignments. *Bioinformatics*. 2011;27 6:757-63.
- 24 377 31. Rice P, Longden I and Bleasby A. EMBOSS: the European molecular biology open software  
25 378 suite. Elsevier Current Trends, 2000.
- 26 379 32. Bachmann K. Specific nuclear DNA amounts in toads of the genus *Bufo*. *Chromosoma*.  
27 380 1970;29 3:365-74.
- 29 381 33. Camper J, Ruedas L, Bickham J and Dixon J. The relationship of genome size with  
30 382 developmental rates and reproductive strategies in five families of neotropical bufonoid frogs.  
31 383 *Life Sci Adv*. 1993;12:79-87.
- 32 384 34. Bachmann K. Nuclear DNA and developmental rate in frogs. *Quarterly Journal of the Florida*  
33 385 *Academy of Sciences*. 1972;35 4:225-31.
- 34 386 35. Chipman AD, Khaner O, Haas A and Tchernov E. The evolution of genome size: what can be  
35 387 learned from anuran development? *Journal of Experimental Zoology Part A: Ecological*  
36 388 *Genetics and Physiology*. 2001;291 4:365-74.
- 37 389 36. Griffin C, Scott D and Papworth D. The influence of DNA content and nuclear volume on the  
38 390 frequency of radiation-induced chromosome aberrations in *Bufo* species. *Chromosoma*.  
39 391 1970;30 2:228-49.
- 41 392 37. Goin OB, Goin CJ and Bachmann K. DNA and amphibian life history. *Copeia*. 1968:532-40.
- 42 393 38. MacCulloch RD, Upton DE and Murphy RW. Trends in nuclear DNA content among  
43 394 amphibians and reptiles. *Comparative Biochemistry and Physiology Part B: Biochemistry and*  
44 395 *Molecular Biology*. 1996;113 3:601-5.
- 45 396 39. Marçais G and Kingsford C. A fast, lock-free approach for efficient parallel counting of  
46 397 occurrences of k-mers. *Bioinformatics*. 2011;27 6:764-70.
- 48 398 40. Vurture GW, Sedlazeck FJ, Nattestad M, Underwood CJ, Fang H, Gurtowski J, et al.  
49 399 GenomeScope: fast reference-free genome profiling from short reads. *Bioinformatics*. 2017;33  
50 400 14:2202-4.
- 51 401 41. Wilhelm J, Pingoud A and Hahn M. Real-time PCR-based method for the estimation of genome  
52 402 sizes. *Nucleic Acids Research*. 2003;31 10:e56-e.
- 53 403 42. Holt C and Yandell M. MAKER2: an annotation pipeline and genome-database management  
54 404 tool for second-generation genome projects. *BMC bioinformatics*. 2011;12 1:491.
- 55 405 43. Slater GSC and Birney E. Automated generation of heuristics for biological sequence  
56 406 comparison. *BMC bioinformatics*. 2005;6 1:31.
- 58 407 44. Smit AFA, Hubley R and Green P. 2013–2015. RepeatMasker Open-4.0. 2013.  
59 408 <http://www.repeatmasker.org/>.

- 409 45. Hubley R, Finn RD, Clements J, Eddy SR, Jones TA, Bao W, et al. The Dfam database of  
1 410 repetitive DNA families. *Nucleic acids research*. 2015;44 D1:D81-D9.
- 2 411 46. Smit AFA and Hubley R. 2008–2015. RepeatModeler Open-1.0. 2008.  
3 412 <http://www.repeatmasker.org/>.
- 4 413 47. Korf I. Gene finding in novel genomes. *BMC bioinformatics*. 2004;5 1:59.
- 5 414 48. Apweiler R, Bairoch A, Wu CH, Barker WC, Boeckmann B, Ferro S, et al. UniProt: the  
6 415 Universal Protein knowledgebase. *Nucleic Acids Research*. 2004;32 suppl\_1:D115-D9.  
7 416 doi:10.1093/nar/gkh131.
- 8 417 49. Richardson MF, Sequeira F, Selechnik D, Carneiro M, Vallinoto M, Reid JG, et al. Supporting  
9 418 data for “Improving amphibian genomic resources: a multitissue reference transcriptome of an  
10 419 iconic invader.” *Giga-Science Database* 2017. <http://dx.doi.org/10.5524/100374>.
- 11 420 50. Davey NE, Shields DC and Edwards RJ. SLiMDisc: short, linear motif discovery, correcting  
12 421 for common evolutionary descent. *Nucleic acids research*. 2006;34 12:3546-54.
- 13 422 51. Hedges SB, Dudley J and Kumar S. TimeTree: a public knowledge-base of divergence times  
14 423 among organisms. *Bioinformatics*. 2006;22 23:2971-2.
- 15 424 52. Kumar S, Stecher G and Tamura K. MEGA7: molecular evolutionary genetics analysis version  
16 425 7.0 for bigger datasets. *Molecular biology and evolution*. 2016;33 7:1870-4.

20 426

21  
22  
23  
24  
25  
26  
27  
28  
29  
30  
31  
32  
33  
34  
35  
36  
37  
38  
39  
40  
41  
42  
43  
44  
45  
46  
47  
48  
49  
50  
51  
52  
53  
54  
55  
56  
57  
58  
59  
60  
61  
62  
63  
64  
65

427 **Tables**

1  
2  
3  
4 428 **Table 1.** Summary statistics of generated whole genome shotgun sequencing data. Bold rows indicate  
5  
6 429 data used for assembly.

| Platform                         | Library Type | Mean insert size (kb) | Mean read length (bp) | Number of reads      | Number of bases (Gb) |
|----------------------------------|--------------|-----------------------|-----------------------|----------------------|----------------------|
| HiSeqX (raw)                     | Paired-end   | 0.35                  | 147.7                 | 1,857,762,090        | 282.92               |
| <b>HiSeqX (filtered)</b>         |              |                       | <b>140.6</b>          | <b>1,205,616,705</b> | <b>169.47</b>        |
| PacBio RS II                     | SMRTbell     | 15-50                 | 8,852                 | 2,794,391            | 24.736               |
| PacBio RS II                     | SMRTbell     | 15-50                 | 9,085                 | 595,447              | 5.409                |
| PacBio RS II                     | SMRTbell     | 15-50                 | 10,432                | 1,867,543            | 19.482               |
| PacBio RS II                     | SMRTbell     | 20-50                 | 10,834                | 2,487,852            | 26.952               |
| <b>PacBio Total</b>              |              |                       | <b>9,887</b>          | <b>7,745,233</b>     | <b>76.58</b>         |
| <b>PacBio Unique<sup>1</sup></b> |              |                       | <b>10,987</b>         | <b>6,167,714</b>     | <b>67.77</b>         |

28 430 1. Longest read per sequenced molecule (SMRT ZMW).  
29  
30  
31  
32 431  
33  
34  
35  
36 432  
37  
38  
39 433  
40  
41  
42  
43 434  
44  
45  
46  
47 435  
48  
49  
50 436  
51  
52 437  
53  
54  
55 438  
56  
57 439  
58  
59  
60 440

441 **Table 2.** Summary of genome assemblies. For comparison, statistics are provided for two existing  
 442 neobatrachian genomes, *Nanorana parkeri* (v2) [15] and *Lithobates catesbeianus* (v2.1)[14], and two  
 443 anuran reference genomes, *Xenopus tropicalis* (v9.1) [16] and *X. laevis* (v9.2) [17]. Lengths are given  
 444 to 3 s.f.

| Genome Assembly          | Hybrid (v2.2) | Short read | Long read | <i>N. parkeri</i> (v2.0) | <i>L. catesbeianus</i> (v2.1) | <i>X. tropi- calis</i> (v9.1) | <i>X. laevis</i> (v9.2) |
|--------------------------|---------------|------------|-----------|--------------------------|-------------------------------|-------------------------------|-------------------------|
| Total Length (Gb)        | 2.55          | 3.75       | 2.69      | 2.07                     | 6.25                          | 1.44                          | 2.72                    |
| No. scaffolds            | 31,392        | 19.9 M*    | 31,392*   | 135,808                  | 1.54 M                        | 6,822                         | 108,033                 |
| Proportion gap (%N)      | 0.00%         | 0.14%      | 0.00%     | 3.86%                    | 11.58%                        | 4.90%                         | 11.39%                  |
| N50                      | 168 kb        | 583 bp     | 167 kb    | 1.06 Mb                  | 39.4 kb                       | 135 Mb                        | 137 Mb                  |
| L50                      | 3,373         | 715 k      | 3,531     | 555                      | 31,248                        | 5                             | 9                       |
| Longest scaffold         | 3.53 Mb       | 72.6 kb    | 3.64 Mb   | 8.61 Mb                  | 1.38 Mb                       | 195 Mb                        | 220 Mb                  |
| GC                       | 43.23%        | 43.25%     | 42.88%    | 42.58%                   | 43.14%                        | 40.07%                        | 38.98%                  |
| <b>BUSCO<sup>1</sup></b> |               |            |           |                          |                               |                               |                         |
| Complete Single copy     | 80.9%         | 15.5%      | 2.2%      | 83.4%                    | 42.3%                         | 87.5%                         | 52.9%                   |
| Complete Duplicate       | 2.2%          | 0.7%       | 0.0%      | 1.6%                     | 0.9%                          | 1.0%                          | 39.8%                   |
| Fragment                 | 7.5%          | 33.6%      | 2.2%      | 7.2%                     | 22.3%                         | 6.0%                          | 3.2%                    |

445 1. BUSCO v2.0.1 short summary statistics (n=3950).

446 \* Statistics for short and long read assemblies refer to contigs used for hybrid assembly.

447

448 **Table 3.** GenomeScope genome size estimates for *Rhinella marina* based on raw trimmed Illumina data  
 449 using different combinations of k and maximum k-mer coverage. Lengths are in megabases (0 d.p.).

| Data       | Max<br>kmer<br>coverage | Unique Length<br>(Mb) |       | Repeat Length<br>(Mb) |     | Haploid Genome Size<br>(Mb) |       |
|------------|-------------------------|-----------------------|-------|-----------------------|-----|-----------------------------|-------|
|            |                         | Min                   | Max   | Min                   | Max | Min                         | Max   |
| Raw (k=21) | 1000                    | 1,365                 | 1,366 | 489                   | 489 | 1,853                       | 1,855 |
| Raw (k=21) | 10000                   | 1,365                 | 1,365 | 874                   | 874 | 2,239                       | 2,240 |
| Raw (k=23) | 1000                    | 1,453                 | 1,455 | 470                   | 471 | 1,924                       | 1,926 |
| Raw (k=23) | 10000                   | 1,454                 | 1,454 | 842                   | 842 | 2,296                       | 2,296 |
| Q30 (k=21) | 1000                    | 1,307                 | 1,308 | 462                   | 462 | 1,768                       | 1,771 |
| Q30 (k=21) | 10000                   | 1,307                 | 1,308 | 749                   | 749 | 2,056                       | 2,057 |
| Q30 (k=23) | 1000                    | 1,389                 | 1,391 | 438                   | 439 | 1,828                       | 1,830 |
| Q30 (k=23) | 10000                   | 1,390                 | 1,391 | 713                   | 713 | 2,103                       | 2,104 |

450

451

452

453

454

455

456

457

458

459

460 **Table 4.** Estimation of *Rhinella marina* genome size using various methods and the corresponding level  
 461 of sequencing coverage (3 s.f.). GenomeScope values in this table are mean values from the four setting  
 462 combinations.

| Method                | Estimated Genome Size (Gb) | Illumina coverage (X) | PacBio coverage (X) | Reference        |
|-----------------------|----------------------------|-----------------------|---------------------|------------------|
| Flow cytometry (mean) | 4.33                       | 65.3                  | 17.7                | [26, 33, 35, 38] |
| Flow cytometry (min)  | 3.98                       | 71.1                  | 19.2                | [38]             |
| Flow cytometry (max)  | 4.90                       | 57.7                  | 15.6                | [35]             |
| Densitometry (mean)   | 4.95                       | 57.1                  | 15.5                | [32, 34, 36, 37] |
| Densitometry (min)    | 4.06 <sup>#</sup>          | 69.7                  | 18.9                | [37]             |
| Densitometry (max)    | 5.65                       | 50.1                  | 13.6                | [32]             |
| GenomeScope (raw)     | 2.08                       | 136                   | 36.8                | -                |
| GenomeScope (Q30)     | 1.94                       | 146                   | 39.4                | -                |
| qPCR (zfp292)         | 2.38                       | 119                   | 32.1                | -                |
| Assembly (v2.2)       | 2.55                       | 111                   | 30.0                | -                |

463 # value adjusted to account for updated size of reference genome used to infer *R. marina* genome size.

471 **Table 5.** Summary statistics of consensus protein-coding gene predictions and predicted repeat  
 472 elements (including RNA genes) for the *Rhinella marina* v2.2 draft genome. Lengths are given to 3 s.f.  
 473 Coverage and mean depth statistics for PacBio and Q30-trimmed Illumina reads are given to 2 d.p.

| Element             | Count     | No. scaffolds | Avg. length | Total length | Genome coverage | PacBio depth (X) | Illumina depth (X) |
|---------------------|-----------|---------------|-------------|--------------|-----------------|------------------|--------------------|
| Protein-coding gene | 58,302    | 19,530        | 18.8 kb     | 1.10 Gb      | 42.91%          | 20.32            | 58.07              |
| Transcript          | 58,302    | 19,530        | 1.24 kb     | 72.3 Mb      | 2.83%           | 20.49            | 65.41              |
| - Similar to known  | 25,846    | 11,918        | 1.90 kb     | 49.1 Mb      | 1.92%           | 20.08            | 56.42              |
| - Unknown           | 32,456    | 15,213        | 714 bp      | 23.2 Mb      | 0.91%           | 20.98            | 68.82              |
| Exon                | 309,718   | 19,530        | 233 bp      | 72.3 Mb      | 2.83%           | 20.49            | 65.41              |
| - Coding            | 294,535   | 19,530        | 207 bp      | 60.8 Mb      | 2.38%           | 20.67            | 66.97              |
| Intron              | 251,416   | 18,509        | 4.08 kb     | 1.03 Gb      | 40.09%          | 20.30            | 57.55              |
| 5' UTR              | 15,855    | 8,839         | 208 bp      | 3.29 Mb      | 0.13%           | 18.69            | 53.86              |
| CDS                 | 58,302    | 19,530        | 1.04 kb     | 60.8 Mb      | 2.38%           | 20.67            | 66.97              |
| 3' UTR              | 11,965    | 5,780         | 682 bp      | 8.16 Mb      | 0.32%           | 19.91            | 58.52              |
| BUSCO SC Complete   | 3,194     | 2,014         | 32.6 kb     | 104 Mb       | 4.07%           | 19.89            | 53.01              |
| <b>Repeats</b>      |           |               |             |              |                 |                  |                    |
| SINE                | 21,620    | 9,322         | 338 bp      | 7.31 Mb      | 0.29%           | 19.45            | 58.23              |
| LINE                | 268,569   | 27,620        | 513 bp      | 138 Mb       | 5.38%           | 21.03            | 72.29              |
| LTR                 | 201,817   | 24,949        | 504 bp      | 102 Mb       | 3.98%           | 22.62            | 68.96              |
| DNA                 | 817,405   | 30,689        | 600 bp      | 490 Mb       | 19.17%          | 21.67            | 68.37              |
| Helitron            | 20,319    | 9,340         | 826 bp      | 16.8 Mb      | 0.66%           | 19.32            | 56.81              |
| Retroposon          | 1,042     | 829           | 549 bp      | 570 kb       | 0.02%           | 18.22            | 50.87              |
| Other               | 18        | 17            | 209 bp      | 3.7 kb       | 0.00%           | 14.27            | 24.60              |
| Unknown             | 1,610,883 | 30,966        | 513 bp      | 826 Mb       | 32.28%          | 20.12            | 59.39              |
| Satellite           | 25,557    | 10,270        | 440 bp      | 11.3 Mb      | 0.44%           | 18.38            | 54.21              |
| Simple repeats      | 968,947   | 30,620        | 56.9 bp     | 55.1 Mb      | 2.16%           | 18.88            | 48.51              |
| Low complexity      | 141,028   | 24,020        | 51.8 bp     | 7.30 Mb      | 0.29%           | 22.48            | 64.48              |
| rRNA                | 5,227     | 2,923         | 422 bp      | 2.20 Mb      | 0.09%           | 40.88            | 142.42             |
| tRNA                | 5,558     | 4,474         | 105 bp      | 583 kb       | 0.02%           | 29.15            | 140.06             |
| snRNA               | 21,788    | 9,432         | 546 bp      | 11.9 Mb      | 0.47%           | 24.63            | 89.12              |

|   |                          |           |        |         |         |       |       |        |
|---|--------------------------|-----------|--------|---------|---------|-------|-------|--------|
| 1 | srpRNA                   | 17        | 11     | 268 bp  | 4.55 kb | 0.00% | 22.11 | 140.44 |
| 2 | scRNA                    | 3         | 3      | 69.0 bp | 207 bp  | 0.00% | 15.53 | 47.29  |
| 3 | RNA                      | 418       | 266    | 482 bp  | 202 kb  | 0.01% | 32.65 | 173.99 |
| 4 |                          |           |        |         |         |       |       |        |
| 5 | <b>Repeat</b>            |           |        |         |         |       |       |        |
| 6 | <b>TOTAL<sup>1</sup></b> | 4,110,222 | 31,179 | 406 bp  | 1.63 Gb | 63.9% | 20.82 | 63.79  |

---

1. Values for repeat totals account for overlapping repeats.

7 474  
8  
9  
10  
11 475  
12  
13  
14 476  
15  
16  
17 477  
18  
19  
20 478  
21  
22  
23 479  
24  
25  
26 480  
27  
28  
29 481  
30  
31  
32 482  
33  
34  
35 483  
36  
37  
38  
39 484  
40  
41 485  
42  
43 486  
44  
45  
46 487  
47  
48 488  
49  
50  
51 489  
52  
53 490  
54  
55  
56 491  
57  
58 492  
59  
60  
61  
62  
63  
64  
65



493 **Table 6.** Proportions of predicted protein and transcript sequences exceeding 50%, 80%, 95% or 99%  
 494 coverage in the top BLAST+ hit from the published transcriptome [18], and combined coverage for the  
 495 top ten transcript hits. All percentages given to 3 s.f.

| Type                                | Count  | Coverage in top transcript hit |      |      |      | Coverage in top 10 transcript hits |      |      |      |
|-------------------------------------|--------|--------------------------------|------|------|------|------------------------------------|------|------|------|
|                                     |        | 50%+                           | 80%+ | 95%+ | 99%+ | 50%+                               | 80%+ | 95%+ | 99%+ |
| Protein<br>(similar to<br>known)    | 25,846 | 93.6                           | 76.7 | 56.5 | 40.7 | 97.5                               | 90.3 | 72.7 | 54.2 |
| Transcript<br>(similar to<br>known) | 25,846 | 75.0                           | 50.0 | 30.8 | 21.4 | 82.6                               | 73.1 | 57.2 | 40.9 |
| Protein<br>(unknown)                | 32,456 | 79.9                           | 49.8 | 27.1 | 15.8 | 85.7                               | 66.3 | 44.4 | 29.9 |
| Transcript<br>(unknown)             | 32,456 | 43.6                           | 21.5 | 12.1 | 8.61 | 52.6                               | 37.3 | 25.4 | 19.1 |

496

497

498

499

500

501

502

503

504

505

506

## 507 **Figure legends**

1  
2  
3 508 **Figure 1. *Rhinella marina*.** (A) An adult cane toad. (B) Phylogenetic tree of the five frog and toad  
4  
5 509 species used in this study, plus human as a reference. Taxonomic relationships and estimated divergence  
6  
7 510 times are from TimeTree [51] and visualised with MEGA7 [52]. Branch lengths indicate approximate  
8  
9 511 divergence times in millions of years (0 d.p.).

10  
11  
12 512 **Figure 2. Schematic overview of project workflow.** A summary of the experimental methods used  
13  
14 513 for sequencing, assembly, annotation and size estimation of the cane toad genome. Transcriptome data  
15  
16 514 (orange segment) was obtained from our previous study [18].

17  
18  
19  
20 515 **Figure 3. Assessment of genome assembly completeness.** BUSCO analysis of *Rhinella marina*  
21  
22 516 genome assembly (v2.0 uncorrected, v2.1 pilon polishing, v2.2 pilon and arrow polishing), *Lithobates*  
23  
24 517 *catesbeianus* (v2.1), *Nanorana parkeri* (v2.0), *Xenopus tropicalis* (v9.1) and *X. leavis* (v9.2) genomes  
25  
26 518 using the tetrapoda\_odb9 orthologue set (n=3950). The *X. leavis* genome duplication is made clear by  
27  
28 519 the large number of paralogs (light blue) with respect to other assemblies.

29  
30  
31  
32 520 **Figure 4. GenomeScope k-mer frequency and log-transformed k-mer coverage profiles.** (A) raw  
33  
34 521 Illumina data (k=23), (B) Q30 trimmed Illumina data (k=23). Profiles for k=21 are similar (data not  
35  
36 522 shown).

37  
38  
39  
40 523 **Figure 5. Summary of the main annotation classes for *Rhinella marina* genome assembly.**  
41  
42 524 Identified repeat classes exceeding 2% of assembly have been plotted separately (1 d.p.). All other  
43  
44 525 repeats, including “Unknown”, have been grouped as “Other repeats”. The percentage for introns  
45  
46 526 excludes any repeat sequences within those introns.

47  
48  
49 527  
50  
51  
52  
53  
54  
55  
56  
57  
58  
59  
60  
61  
62  
63  
64  
65

A.

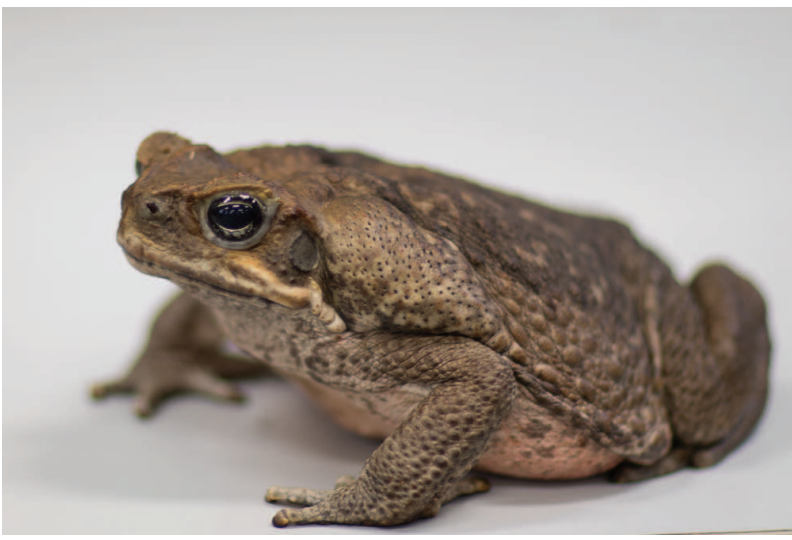

B.

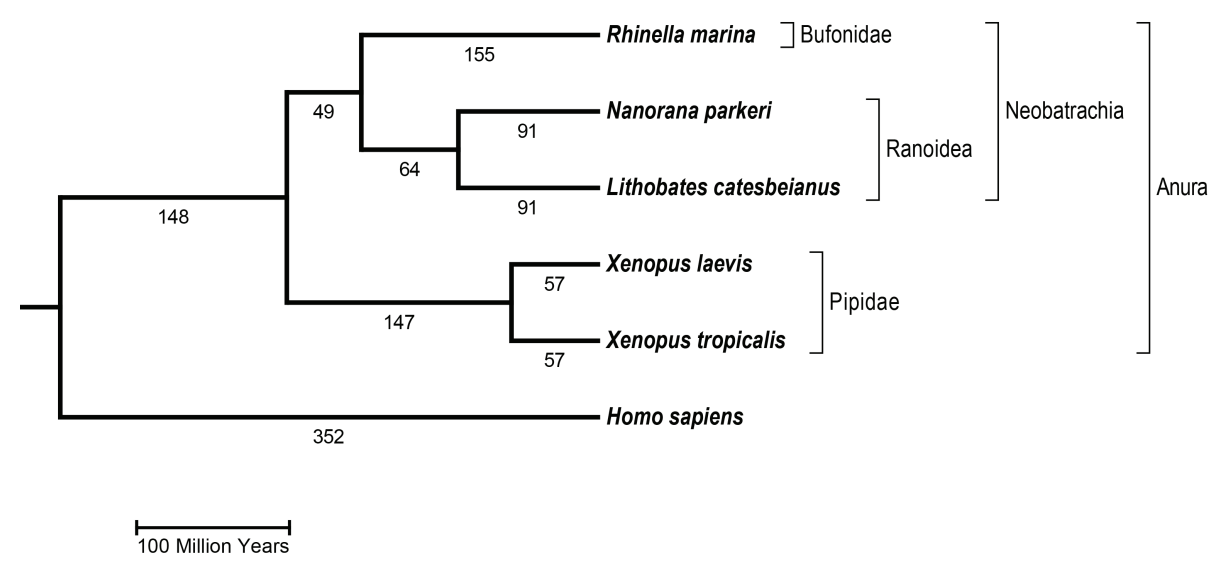

Figure 2

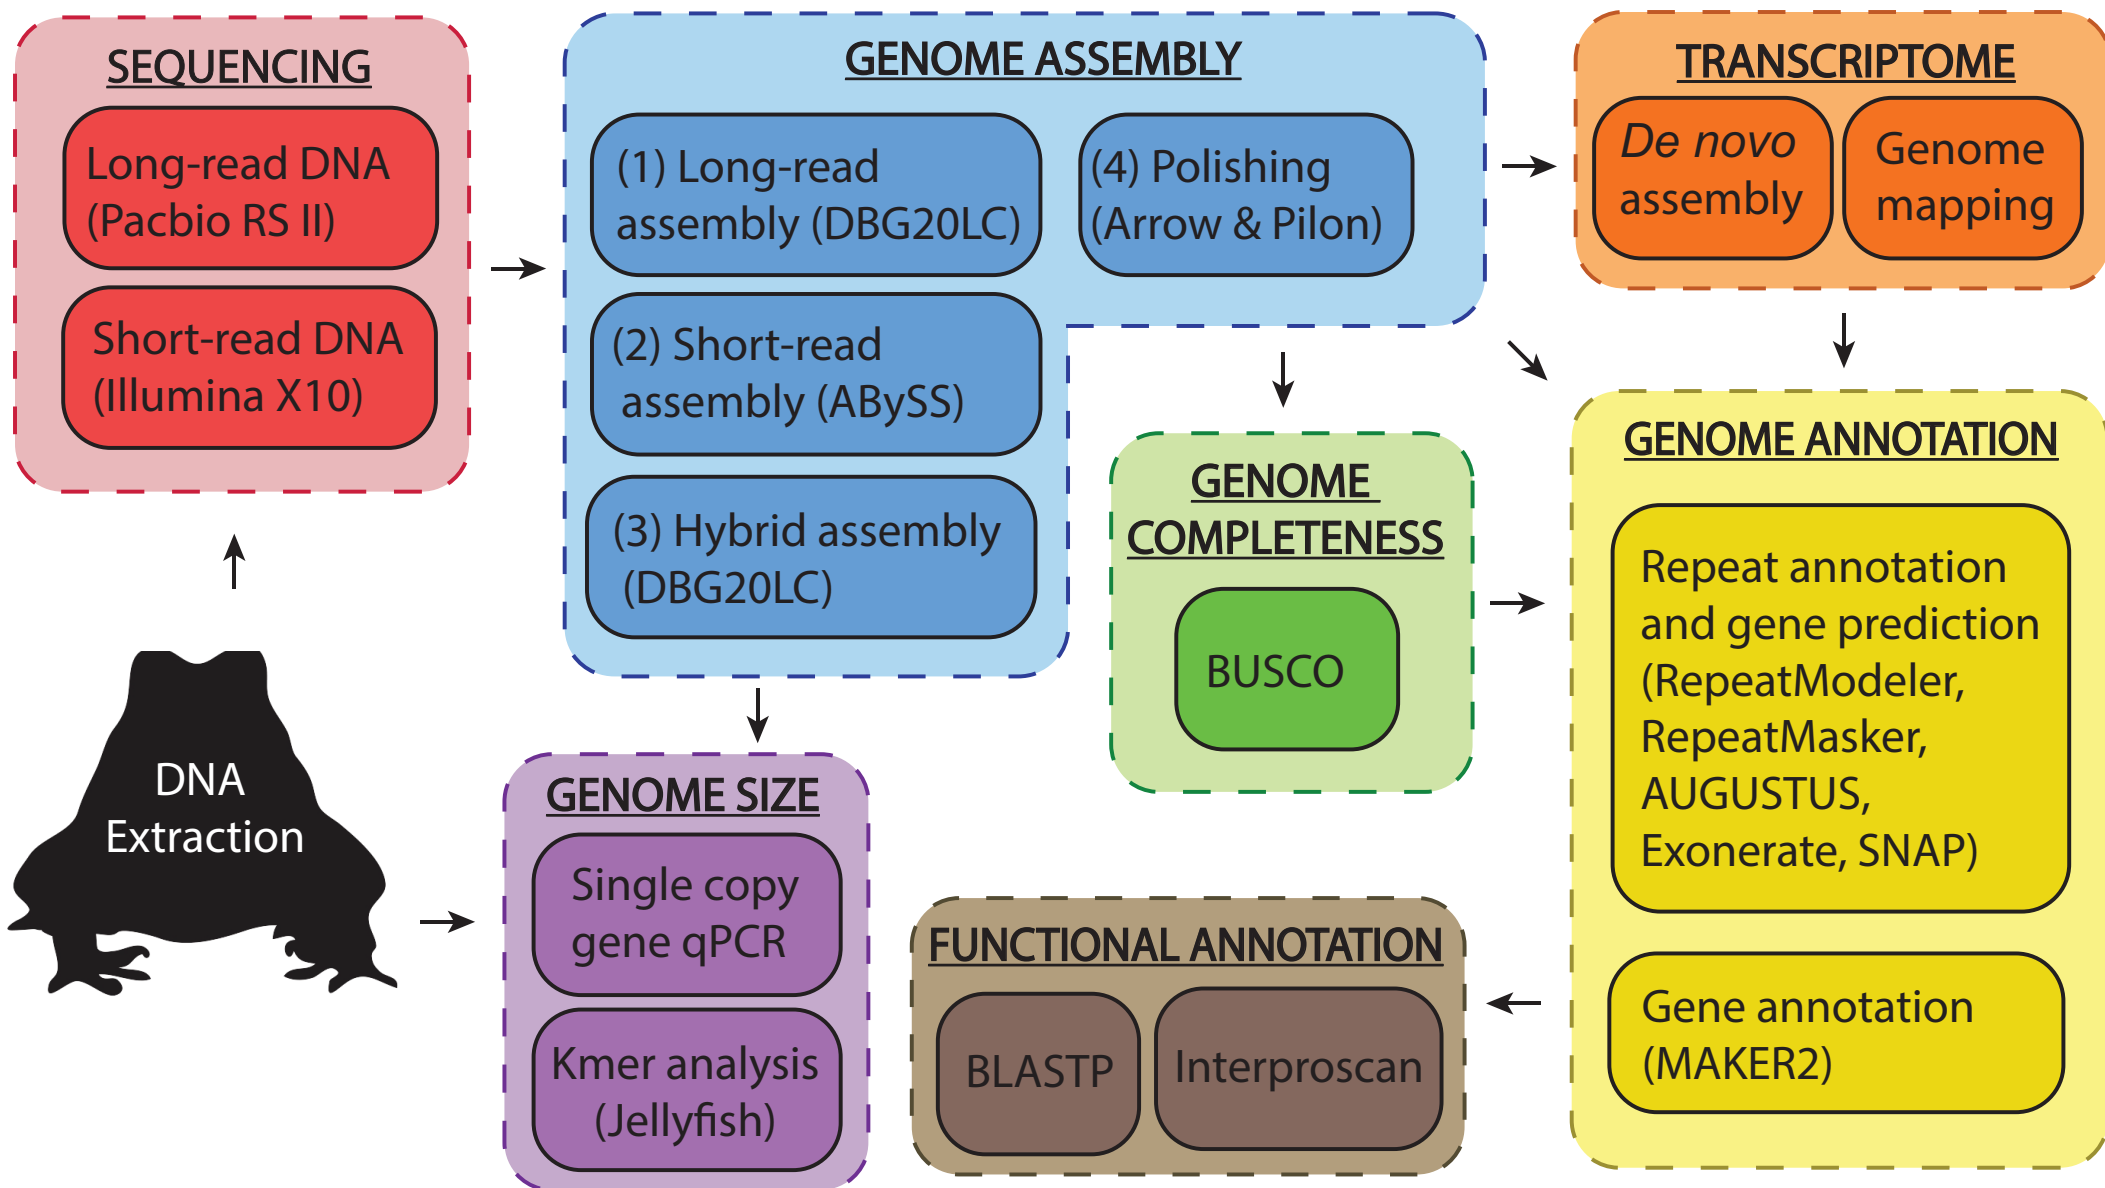

Figure 3 [Click here to download Figure Figure 3.pdf](#) 

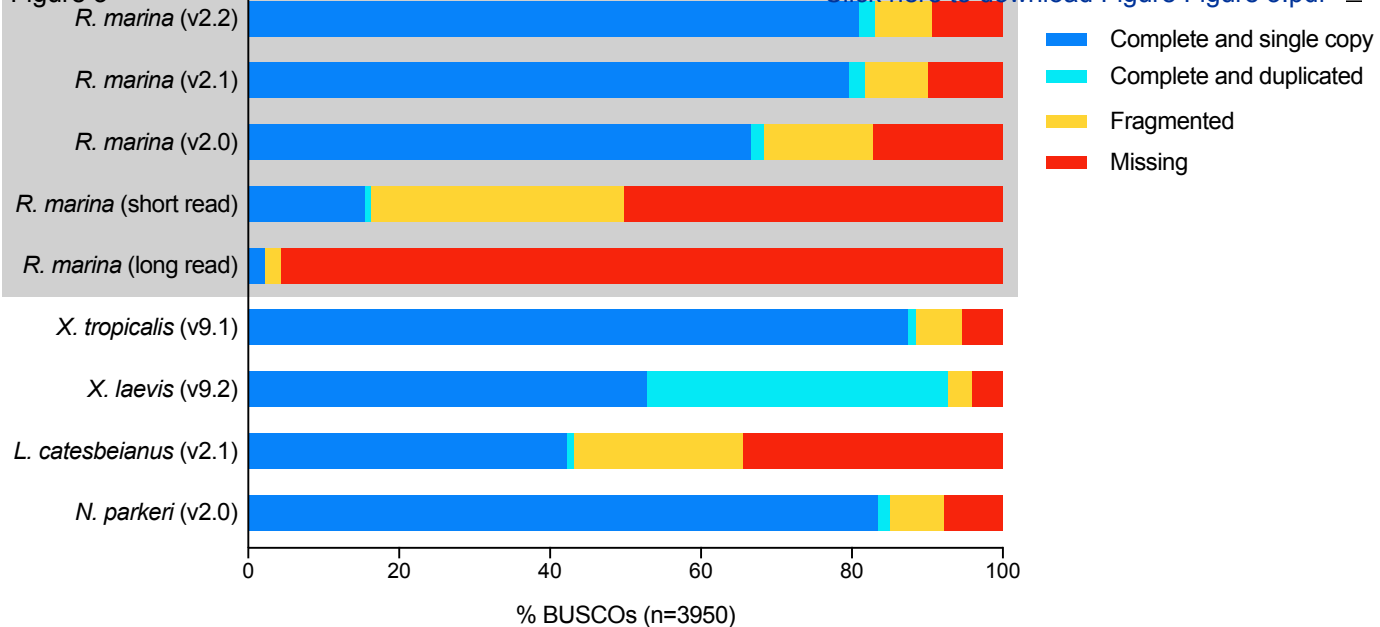

## A. Raw data (k=23)

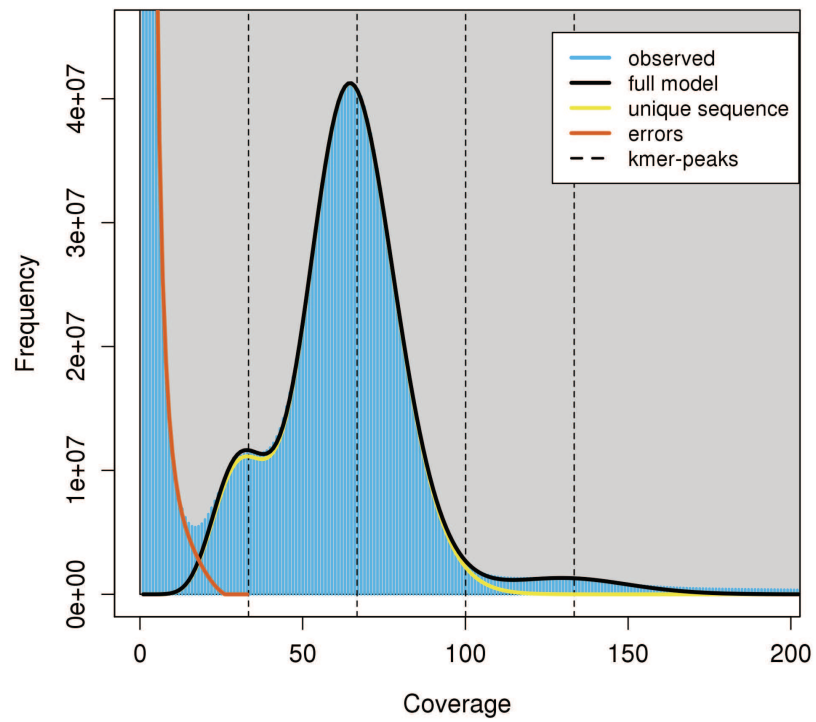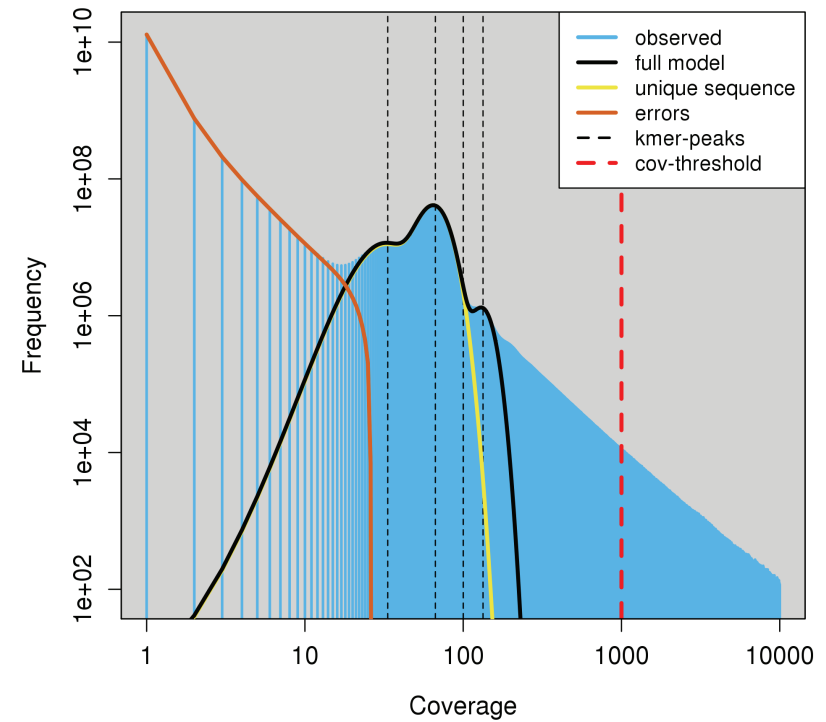

## B. Q30 trimmed data (k=23)

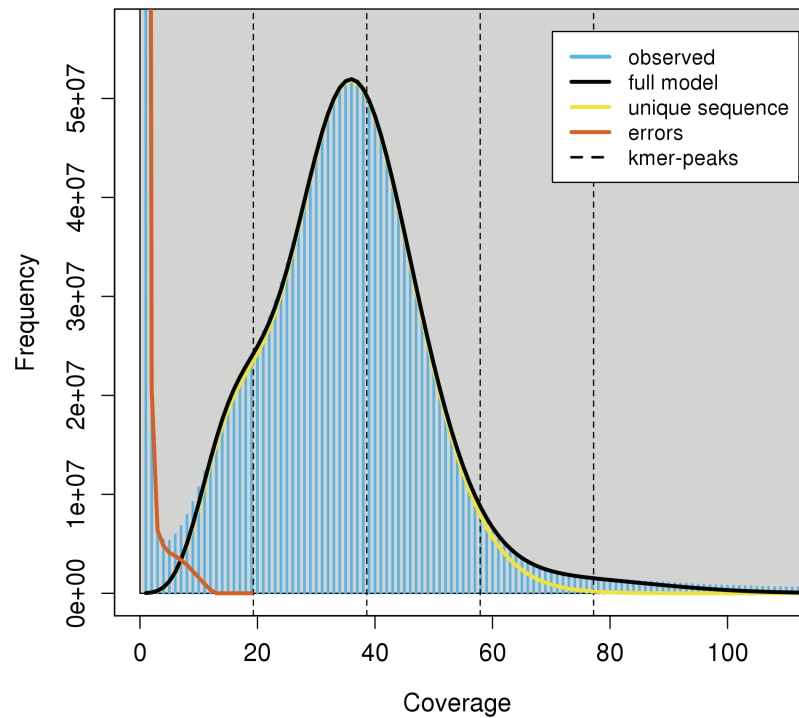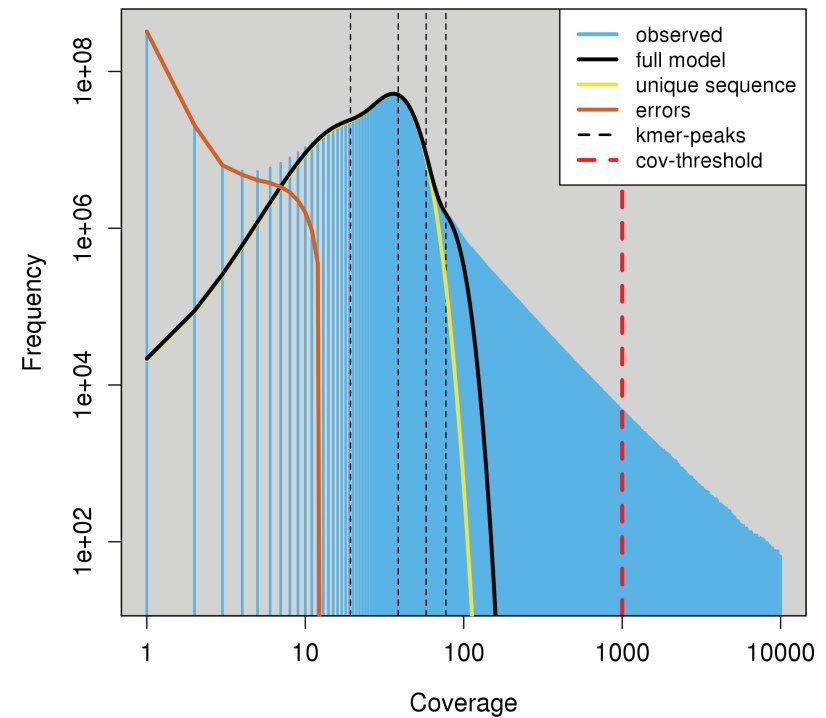

Figure 5

[Click here to download Figure Figure 5.pdf](#)

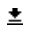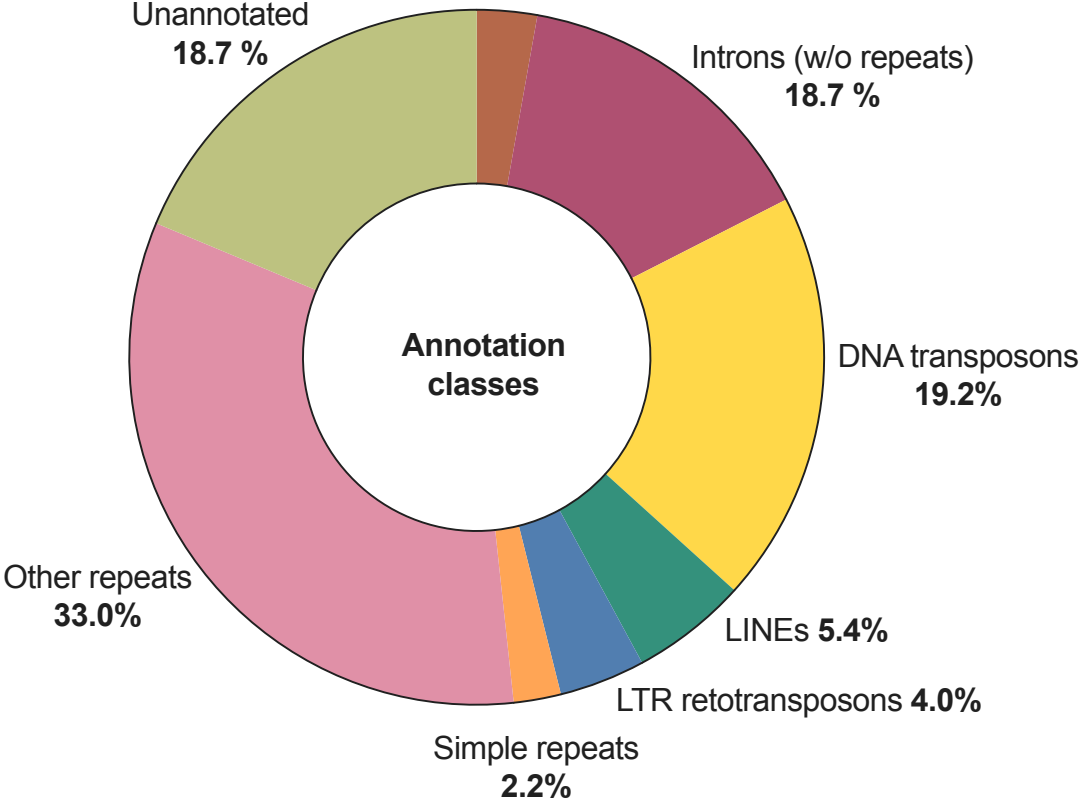



Click here to access/download  
**Supplementary Material**  
Table S1.xlsx





Click here to access/download  
**Supplementary Material**  
Table S2.xlsx
